# 1 Sex differentiation and a chromosomal inversion lead to cryptic 2 diversity in Lake Tanganyika sardines

3

4 Julian Junker\*<sup>1,2</sup>, Jessica A. Rick\*<sup>3</sup>, Peter B. McIntyre<sup>4</sup>, Ismael Kimirei<sup>5</sup>, Emmanuel A. Sweke<sup>5,7</sup>, Julieth  
5 B. Mosille<sup>5</sup>, Bernhard Werli<sup>1,6</sup>, Christian Dinkel<sup>1</sup>, Salome Mwaiko<sup>1,2</sup>, Ole Seehausen<sup>1,2</sup>, Catherine E.  
6 Wagner<sup>3</sup>

7 \* denotes equal contribution

8 1 EAWAG Swiss Federal Institute of Aquatic Science and Technology, CH-6047 Kastanienbaum,  
9 Switzerland

10 2 Division of Aquatic Ecology, Institute of Ecology & Evolution, University of Bern, CH-3012 Bern,  
11 Switzerland

12 3 Department of Botany and Program in Ecology, University of Wyoming, Laramie, Wyoming 82072  
13 USA

14 4 Department of Natural Resources, Cornell University, Ithaca NY 14850 USA

15 5 Tanzania Fisheries Research Institute (TAFIRI), Dar es Salaam, Tanzania

16 6 Institute of Biogeochemistry and Pollutant Dynamics, ETH Zurich, CH-8092 Zürich, Switzerland

17 7 Deep Sea Fishing Authority (DSFA), Zanzibar, Tanzania

18 Corresponding authors: Julian Junker ([Julian.junker@eawag.ch](mailto:Julian.junker@eawag.ch)), Jessica Rick ([jrick@uwyo.edu](mailto:jrick@uwyo.edu)) and  
19 Catherine E. Wagner ([Catherine.Wagner@uwyo.edu](mailto:Catherine.Wagner@uwyo.edu))

20

21

22

23

24

25

26

27

28

29

30

31

32

33 **Abstract**

34 Two endemic sardines in Lake Tanganyika, *Limnothrissa miodon* and *Stolothrissa tanganyicae*, are  
35 important components of the lake's total annual fishery harvest. These two species along with four  
36 endemic *Lates* species represent the dominant species in Lake Tanganyika's pelagic fish community,  
37 in contrast to the complex pelagic communities in nearby Lake Malawi and Victoria. We use reduced  
38 representation genomic sequencing methods to gain a better understanding of possible genetic  
39 structure among and within populations of Lake Tanganyika's sardines. Samples were collected along  
40 the Tanzanian, Congolese, and Zambian shores, as well as from nearby Lake Kivu, where *Limnothrissa*  
41 was introduced in 1959. Our results reveal unexpected cryptic differentiation within both *Stolothrissa*  
42 and *Limnothrissa*. We resolve this genetic structure to be due to the presence of large sex-specific  
43 regions in the genomes of both species, but involving different polymorphic sites in each species.  
44 Additionally, we find a large segregating inversion in *Limnothrissa*. We find all inversion karyotypes  
45 throughout the lake, but the frequencies vary along a north-south gradient within Lake Tanganyika,  
46 and differ substantially in the introduced Lake Kivu population. Little to no spatial genetic structure  
47 exists outside the inversion, even over the hundreds of kilometres covered by our sampling. These  
48 genetic analyses show that Lake Tanganyika's sardines have dynamically evolving genomes, and the  
49 analyses here represent a key first step in understanding the genetic structure of the Lake  
50 Tanganyika pelagic sardines.

51

52 **Keywords:** *Stolothrissa tanganyicae*, *Limnothrissa miodon*, Lake Tanganyika, Inversion, sex-specific  
53 region

54

55

## 56 Introduction

57 Identifying the genetic basis of ecological adaptation is a high priority in evolutionary biology and has  
58 important implications for population management. Recent research in this field focuses on genomic  
59 regions with reduced recombination rates, such as chromosomal inversions (e.g. Berg *et al.* 2017;  
60 Christmas *et al.* 2018; Kirubakaran *et al.* 2016; Lindtke *et al.* 2017), sex chromosome regions  
61 (Presgraves 2008; Qvarnstrom & Bailey 2009) or both (Connallon *et al.* 2018; Hooper *et al.* 2019;  
62 Natri *et al.* 2019). The reduced recombination rates in such chromosomal regions enable local  
63 adaptation even when gene flow is high (Kirkpatrick & Barton 2006). Furthermore, it appears that  
64 these mechanisms for restricted recombination are more prevalent in sympatric than in allopatric  
65 species, and fixation of inversions is faster in lineages with high rates of dispersal and gene flow (Berg  
66 *et al.* 2017). These patterns are consistent with theory in which the presence of gene flow favours  
67 diversification of chromosomal rearrangements caused by locally adapted loci (Berg *et al.* 2017;  
68 Kirkpatrick & Barton 2006).

69 Pelagic habitats represent uniform environments that allow for high dispersal rates due to the lack of  
70 physical barriers. Well known examples of species from pelagic habitats that carry chromosomal  
71 inversions or sex loci include Atlantic cod (*Cadus moruha*) (Berg *et al.* 2017; Kirubakaran *et al.* 2016),  
72 Atlantic herring (*Clupea harengus*) (Lamichhaney *et al.* 2017; Martinez Barrio *et al.* 2016) and  
73 stickleback (*Gasterosteus aculeatus*) (Jones *et al.* 2012). In Atlantic cod and herring populations, low  
74 genome-wide divergence is interspersed with highly divergent inverted regions. These inversions in  
75 cod distinguish between resident and migrating ecotypes (Berg *et al.* 2017; Kirubakaran *et al.* 2016),  
76 and in herring they separate spring and fall spawners (Lamichhaney *et al.* 2017; Martinez Barrio *et al.*  
77 2016). Additionally, inverted genomic regions in sticklebacks are involved in the divergence between  
78 lake and stream ecotypes (Marques *et al.* 2016; Roesti *et al.* 2015).

79 From management perspectives, pelagic mixed stocks are notoriously difficult (Belgrano & Fowler  
80 2011; Botsford *et al.* 1997) and part of this challenge lies in identifying Management Units (MUs)  
81 which are demographically independent and genetically distinct populations. In a uniform habitat  
82 without physical barriers, low genetic differentiation is typical, as there exist few environmental  
83 restrictions to gene flow. However, there are increasingly cases where small genomic differences  
84 lead to important variation in life history, influencing population resilience to fishing pressure (Berg  
85 *et al.* 2017; Hutchinson 2008; Kirubakaran *et al.* 2016). The use of next generation sequencing  
86 methods is therefore needed to shed light on population structure, particularly in species with low  
87 genetic differentiation, to facilitate the detection of chromosomal variants which may be linked to  
88 important ecological or local adaptation or selection (Lamichhane *et al.* 2017). This is because  
89 detailed information on the population structure, ecology and life history of harvested species is  
90 crucial for effective fisheries management.

91 Lake Tanganyika is volumetrically the second largest lake in the world consisting of deep basins in the  
92 north (~1200 m) and south (~1400 m), and a shallower basin (~800 m) in the middle region (Fig 1A)  
93 (McGlue *et al.* 2007). At 9-12 million years in age (Cohen *et al.* 1993), it hosts a long history of  
94 evolution, which has produced remarkable animal communities consisting largely of endemic species  
95 (Coulter 1991). Among these endemics are six fish species which comprise the bulk of the lake's  
96 pelagic fish community. These are two sardines, *Stolothrissa tanganyicae* and *Limnothrissa miodon*,  
97 and four endemic relatives of the Nile perch, *Lates stappersii*, *Lates mariae*, *Lates angustifrons* and  
98 *Lates microlepis*. While little is known about the evolutionary history of the *Lates* species, Wilson *et*  
99 *al.* (2008) showed evidence that the sardines of Lake Tanganyika descend from relatives in western  
100 Africa and diverged from a common ancestor about 8 MYA . The harvest of *Stolothrissa*, *Limnothrissa*  
101 and *L. stappersii* account for up to 95% of all catches within the lake (Coulter 1976, 1991; Mölsä *et*  
102 *al.* 2002), making the second largest inland fishery on the continent of Africa (FAO 1995). The fishing  
103 industry provides employment to an estimated 160'000 (Van der Knaap *et al.* 2014) to 1 million

104 people (Kimirei *et al.* 2008) and is an important source of protein to additional millions living on the  
105 shores of Lake Tanganyika and further inland (Kimirei *et al.* 2008; Mölsä *et al.* 2002; Sarvala *et al.*  
106 2002; Van der Knaap *et al.* 2014). Due to human population growth and an increased demand for  
107 protein, fishing pressure has increased during the last decades, resulting in a decline of pelagic fish  
108 stocks (Coulter 1991; van der Knaap 2013; Van der Knaap *et al.* 2014; van Zwieten *et al.* 2002). Also,  
109 long-term decrease in fish abundance is likely linked to the observed warming of Lake Tanganyika  
110 since the early 1900s, and further warming-induced decline in the lake's productivity is expected  
111 during the 21<sup>st</sup> century (Cohen *et al.* 2016; O'Reilly *et al.* 2003; Verburg & Hecky 2003; Verburg *et al.*  
112 2003). Consequently, there is increasing recognition of the need to develop sustainable management  
113 strategies for the lake's pelagic fish stocks (Kimirei *et al.* 2008; Mölsä *et al.* 1999; Mölsä *et al.* 2002;  
114 van der Knaap 2013; Van der Knaap *et al.* 2014; van Zwieten *et al.* 2002).

115 Despite the economic importance of the pelagic fisheries in this lake, very little previous work has  
116 investigated the genetic and phenotypic diversity and population structure of the key pelagic fish  
117 species or their evolutionary origins (but see De Keyzer *et al.* 2019; Hauser *et al.* 1995, 1998; Wilson  
118 *et al.* 2008). Lake Tanganyika's enormous size and spatial heterogeneity (e.g. Kurki *et al.* 1999;  
119 Loiselle *et al.* 2014) harbours the potential for spatial segregation that may lead to temporal  
120 differences in spawning and life history timing between distant sites. There are indeed indications of  
121 genetically differentiated stocks of some of the pelagic fish of Lake Tanganyika known from basic  
122 genetic work conducted two decades ago. For the sardines, these studies found no clear genetic  
123 population structure at a large geographical scale (Hauser *et al.* 1998; Kuusipalo 1999), but some  
124 small scale differences were found for *Limnothrissa* (Hauser *et al.* 1998). However, the genetic  
125 methods used in these older studies (RAPDs and microsatellites) have limited power, are known to  
126 suffer from error (RAPD, Williams *et al.* 1990), and in addition, have severe limitations in their  
127 resolution. De Keyzer *et al.* (2019) used a modern RAD sequencing approach to examine *Stolothrissa*

128 and found small, if any, spatial structure in *Stolothrissa* sampled from the north, middle, and south of  
129 Lake Tanganyika.

130 In this study, we focus on both sardine species, sampled from 13 sites spanning from the north to the  
131 south of Lake Tanganyika (Fig 1). We also included *Limnothrissa* individuals from the introduced  
132 population of this species present in Lake Kivu. Our null hypothesis was extremely simple: the surface  
133 water of a large lake is horizontally well mixed and therefore provide a homogeneous habitat. Pelagic  
134 fish can move freely and therefore due to the uniform environment, we should expect a lack of  
135 genetic structure of their populations due to free interbreeding. Using reduced representation  
136 genomic sequencing (RAD, Baird *et al.* 2008) we indeed do not find spatial genetic structure in either  
137 species, supporting this null hypothesis. However, many loci deviating from Hardy-Weinberg  
138 equilibrium differentiated the sexes in our samples, suggesting that these species have large sex-  
139 determining regions. Furthermore, we find additional cryptic diversity in *Limnothrissa* due to genetic  
140 patterns consistent with a chromosomal inversion. The generally low spatial genetic structure within  
141 these species facilitated the detection of the differentiated loci, which may be related to sex-specific  
142 or local adaptation.

143

## 144 **Material and Methods**

### 145 *Study system and sampling*

146 Our samples from Lake Tanganyika come from Tanzanian, Congolese and Zambian sites. Additionally  
147 we added Rwandan *Limnothrissa* from Lake Kivu, where the species was introduced during the 1950s  
148 (Collart 1960, 1989; Hauser *et al.* 1995) (Fig 1 and Table 1). Each fish was processed according to  
149 standard protocols, during which we take a cuvette photograph of the live fish and subsequently  
150 euthanize the fish with an overdose of MS222, and take fin clips and muscle tissue samples for  
151 genetic analysis and stable isotope analysis, respectively. The specimens are preserved in

152 formaldehyde and archived in the collections at EAWAG (2016, 2017, 2018 samples), the University  
153 of Wyoming Museum of Vertebrates (2015 samples), and the University of Wisconsin- Madison  
154 (2015 samples). Many fish for this project were obtained from fishermen and were already dead, and  
155 in this case we completed this same protocol without euthanasia.

156

### 157 *Phenotypic sexing*

158 Tanganyikan sardines caught by fishermen are frequently dried after being landed at the beach and  
159 although this does not inhibit the extraction of high-quality DNA, desiccated individuals cannot be  
160 accurately sexed. Therefore, we dissected 34 *Limnothrissa* and 15 *Stolothrissa* that were euthanized  
161 and preserved in formalin just after being caught. These individuals were fully mature and in  
162 excellent condition to accurately phenotypically sex them. We used these phenotypically sexed  
163 individuals to determine whether inferred genetic groups correlated to sex in each species.

164

### 165 *RAD sequencing*

166 We extracted DNA from 486 individuals (181 *Stolothrissa*; 291 *Limnothrissa*) and obtained genomic  
167 sequence data of these individuals using a reduced-representation genomic sequencing approach  
168 (RADseq). Both species were pooled, divided into 10 RAD libraries, and sequenced. The DNA from all  
169 individuals was extracted using Qiagen DNeasy Blood and Tissue kits (Qiagen, Switzerland). For 190  
170 individuals collected in 2015, this DNA was then standardized to 20ng/μL at the University of  
171 Wyoming, and then prepared for RAD sequencing by Floragenex Inc. (Eugene, Oregon), and  
172 sequenced at the University of Oregon on an Illumina HiSeq2000 (100bp SE). Individuals were  
173 multiplexed in groups of 95 individuals using P1 adapters with custom 10 base pair barcodes, and  
174 fragments between 200 and 400bp were selected for sequencing. In order to avoid library effects,  
175 each individual was sequenced in two different libraries and the reads were combined after

176 sequencing. The other 296 individuals collected in 2016 and 2017 were prepared for sequencing  
177 following the protocol by Baird *et al.* (2008) with slight modifications, including using between 400ng  
178 and 1000ng genomic DNA per sample and digesting with *SbfI* overnight. We multiplexed between 24  
179 and 67 of these individuals per library and used P1 adapters (synthesized by Microsynth) with custom  
180 six to eight base pair barcodes. These six libraries were sheared using an S220 series Adaptive  
181 Focused Acoustic (AFA) ultra-sonicator (Covaris Inc. 2012) with the manufacturer's settings for a 500  
182 bp mean fragment size. We selected fragments with a size between 300 and 700bp using a SageElf  
183 (Sage Scientific Electrophoretic Lateral Fractionator; Sage Science, Beverly, MA). The enrichment step  
184 was done in eight aliquots with a total volume of 200  $\mu$ l. Volumes were combined prior to a final size  
185 selection step using the SageELF. Sequencing was done by the Lausanne Genomic Technologies  
186 sequencing facilities of University of Lausanne, Switzerland. We sequenced each of six libraries on a  
187 single lane using an Illumina HiSeq2000 (Illumina Inc. 2010) (100bp SE) together with 7–20%  
188 bacteriophage PhiX genomic DNA.

189

#### 190 *Sequence data preparation*

191 We filtered raw sequencing reads from each library by first removing PhiX reads using bowtie2  
192 (Langmead & Salzberg 2012). Then we filtered reads for an intact *SbfI* restriction site, de-multiplexed  
193 the fastq file, and trimmed the reads down to 84 nucleotides using process\_radtags from Stacks  
194 v1.26 (Catchen *et al.* 2013) and a custom bash script. The FASTX toolkit v.0.0.13  
195 ([http://hannonlab.cshl.edu/fastx\\_toolkit/](http://hannonlab.cshl.edu/fastx_toolkit/)) and custom python scripts were used for quality filtering.

196 In a first step, we kept only reads with 100% of the bases with quality score of at least 10 and in a  
197 second step, we removed all reads with at least 5% of the bases with quality score below 30.

198

#### 199 *Assembly to reference genome*



200 We generated a reference genome from a male *Limnothrissa* individual collected near Kigoma,  
201 Tanzania, in 2018. High molecular weight DNA was extracted from fin tissue using the Qiagen HMW  
202 gDNA MagAttract Kit, and then libraries were prepared using 10X Genomics Chromium library  
203 preparation at the Hudson-Alpha Institute for Biotechnology Genomic Services Laboratory  
204 (Huntsville, AL). The sequencing libraries were then sequenced on the Illumina HiSeq Xten platform  
205 (150bp PE reads). Read quality was checked using FASTQC (Andrews 2010), and then reads were  
206 assembled using 10X Genomics' Supernova assembly software, using a maximum of 500 million  
207 reads. Assembly completeness was assessed using QUASt-LG (Mikheenko *et al.* 2018), which  
208 computes both standard summary statistics and detects the presence of orthologous gene  
209 sequences.

210 Reads for all *Limnothrissa* and *Stolothrissa* individuals were aligned to the reference genome using  
211 BWA mem (Li & Durbin 2009), following the filtering steps discussed above. Alignments were then  
212 processed using SAMtools v1.8 (Li *et al.* 2009b). We then identified variable sites in three different  
213 groups using SAMtools mpileup and bcftools v1.8 (Li *et al.* 2009a): (1) all individuals; (2) only  
214 *Limnothrissa* individuals; and (3) only *Stolothrissa* individuals. We obtained consistent results using  
215 different combinations of more stringent and relaxed filtering steps. The results shown here are  
216 based on a filtering as follows: within the two monospecific groups, we filtered SNPs using VCFTOOLS  
217 (Danecek *et al.* 2011) to allow no more than 50% missing data per site, removed SNPs with a minor  
218 allele frequency less than 0.01, included only high-quality variants (QUAL > 19), and retained only  
219 biallelic SNPs. For the dataset including both species, we relaxed the missing data filter to allow sites  
220 with up to 75% missing data.

221

222 *Population genetics and outlier detection*

223 After removing individuals with more than 25% missing data, we used the combined dataset to  
224 conduct principal component analysis (PCA) using the R package SNPrelate (Zheng *et al.* 2012). To  
225 delineate and visualize distinct groups, we performed K-means clustering (kmeans in R) on the first  
226 five principal component axes. The value for K was chosen using the broken-stick method based on  
227 the within-group sums of squares. We then used these groupings to assign individual fish to species  
228 and clusters within species. We combined these clustering results with sexed phenotypes to confirm  
229 the identity of each of these clusters.

230 After observing that the primary axis of differentiation in both *Stolothrissa* and *Limnothrissa* was  
231 based on sex, we used the single-species SNP datasets and the R package adegenet (Jombart 2008)  
232 to conduct discriminant analysis of principal components (DAPC, Jombart *et al.* 2010) on males  
233 versus females of *Stolothrissa* and *Limnothrissa* to identify loci contributing to these sex differences.  
234 We visually inspected the DAPC loading plots to determine an appropriate threshold for loading  
235 significance and pulled out loci with loadings above these thresholds in each species. We then  
236 calculated heterozygosity for these sex-associated loci using adegenet in R.

237 If *Stolothrissa* and *Limnothrissa* have a shared origin of these sex-linked loci, then we would expect  
238 them to occur in similar locations in the genome; however, if the sets of significant SNPs are located  
239 on different scaffolds for each of the two species, then expect these regions to more likely originate  
240 from independent evolution. We therefore checked whether the same genomic regions explain  
241 genetic differentiation between sexes in the two species. For this, we compared the location of SNPs  
242 identified in each of the *Stolothrissa* and *Limnothrissa* DAPC analyses, both using the species-specific  
243 and combined SNP data sets. We assessed the proportion of scaffolds shared among the two sets of  
244 significant SNPs. As an additional comparison between the two species, we calculated the proportion  
245 of *Limnothrissa* sex-linked SNPs that were polymorphic in *Stolothrissa*, and vice versa, as well as the  
246 observed heterozygosity of *Limnothrissa* individuals at *Stolothrissa* sex-linked SNPs, and vice versa.

247 For each species, we also investigated population structure beyond sex differences to determine  
248 whether there is any geographic signal of differentiation within each of the species. For this we  
249 removed the sex specific SNPs in the species-specific datasets of both species. In *Limnothrissa* we  
250 additionally removed the SNPs linked to the inverted region. We then calculated  $F_{ST}$  between all  
251 sampling site pairs using VCFTOOLS (Danecek *et al.* 2011). In addition, we calculated pairwise genetic  
252 distances between populations and used these in a Mantel test (using `mantel.randtest()` from  
253 `adegenet` in R) for each species, which tests for an association between genetic distances and  
254 Euclidean geographic distances between sites. For the Mantel tests, we used Edwards' Euclidean  
255 genetic distance (calculated using `dist.genpop()` from `adegenet` in R) and omitted Lake Kivu, as well as  
256 locations with fewer than 10 samples.

257 In *Limnothrissa*, the secondary axis of genetic differentiation clearly split the populations into three  
258 genetic groups. To investigate the genetic basis of these groupings, we used DAPC to identify the loci  
259 with high loadings on the differentiation between the two most extreme groups, using the dataset  
260 where variants were called on *Limnothrissa* individually. In addition, we omitted Lake Kivu individuals  
261 from this DAPC analysis. Once again, we visually inspected the loading plots to determine an  
262 appropriate threshold for significance. We then calculated heterozygosity for these significant loci  
263 using `adegenet` in R.

264 After assigning all individuals to one of the three distinct groups based on K-means clustering  
265 (`kmeans` in R), we counted the frequencies of the three groups at each sampling site. To determine  
266 whether the distribution of individuals among the clusters varied between regions in Lake  
267 Tanganyika, we conducted a two-proportion z-test (`prop.test()` in R) between the three general  
268 regions in Lake Tanganyika, as well as between each of these and Lake Kivu. Because patterns of  
269 heterozygosity were consistent with these three groups being determined by a segregating  
270 chromosomal inversion, we then tested whether the three genotypes are in Hardy-Weinberg

271 Equilibrium across all sampling sites, and within distinct geographic regions using the online tool

272 [www.dr-petrek.eu/documents/HWE.xls](http://www.dr-petrek.eu/documents/HWE.xls)

### 273 *Genetic diversity within and among clusters*

274 We performed population genetic analyses, including calculating genetic diversity within and  
275 divergence between the different intraspecific groups, on the aligned BAM files using ANGSD  
276 (Korneliussen *et al.* 2014), again using the *Limnothrissa* genome as a reference. Methods employed  
277 in ANGSD take genotype uncertainty into account instead of basing analyses on called genotypes,  
278 which is especially useful for low- and medium-depth genomic data (Korneliussen *et al.* 2014), such  
279 as those obtained using RAD methods. From these alignment files, we first calculated the site allele  
280 frequency likelihoods based on individual genotype likelihoods (option -doSaf 1) using the samtools  
281 model (option -GL 1), with major and minor alleles inferred from genotype likelihoods (option -  
282 doMajorMinor 1) and allele frequencies estimated according to the major allele (option -doMaf 2).  
283 We filtered sites for a minimum read depth of 1 and maximum depth of 100, minimum mapping  
284 quality of 20, and minimum quality (q-score) of 20. From the site allele frequency spectrum, we then  
285 calculated the maximum likelihood estimate of the folded site frequency spectrum (SFS) using the  
286 ANGSD realSFS program. The folded SFS was used to calculate per-site theta statistics and genome-  
287 wide summary statistics, including genetic diversity, using the ANGSD thetaStat program  
288 (Korneliussen *et al.* 2013). We performed each of these steps on all fish from each of *Limnothrissa*  
289 and *Stolothrissa*, and then individually for each sampling site, sex, and group (for *Limnothrissa*)  
290 within each species.

291

### 292 *Linkage disequilibrium among loci*

293 To investigate the extent to which the loci identified by DAPC are linked to one another, we used  
294 PLINK v1.9 (Purcell *et al.* 2007) to calculate pairwise linkage disequilibrium between all pairs of SNP

295 loci in our *Limnothrissa* and *Stolothrissa* data sets. Linkage disequilibrium was measured as the  
296 squared allelic correlation ( $R^2$ , Pritchard & Przeworski 2001). We then subsetted each of these  
297 comparisons to only the sex-linked loci identified using DAPC and compared the distribution of  
298 linkage values among the sex-linked loci to those values between all SNPs in the dataset for each of  
299 the two species. We then performed the same comparison for loci implicated in differences among  
300 the three groups in *Limnothrissa*. To determine whether sex and grouping loci are more linked than  
301 average across the genome, we performed a Mann-Whitney U test (`wilcox.test()` in R).

302

## 303 **Results**

### 304 *Genome assembly and variant calling*

305 The final assembly of the 10X Genomics Chromium-generated reference genome for *Limnothrissa*  
306 *miodon*, based on ~56x coverage, comprised 6730 scaffolds of length greater than 10Kb. The  
307 assembly had a scaffold N50 of 456Kb and a total assembly size of 551.1Mb. The genome contained  
308 83.5% complete single-copy BUSCO orthologs, as well as 4.62% fragmented and 11.82% missing  
309 BUSCO genes. We retained only scaffolds > 10Kb in length for the reference genome used in  
310 downstream alignment of the RAD reads.

311 The Floragenex libraries yielded between 306 and 328 million reads including 21–23% bacteriophage  
312 PhiX genomic DNA, while the libraries sequenced at the Lausanne Genomic Technologies sequencing  
313 facilities yielded between 167 and 248 million reads. On average, the mapping rate for *Stolothrissa*  
314 individuals' RAD reads to the *Limnothrissa* reference genome was 80.2%, whereas it was 80.0% for  
315 *Limnothrissa* individuals. We removed six *Stolothrissa* individuals and 10 *Limnothrissa* individuals due  
316 to low quality reads, or too much missing data. After filtering, our species-specific RAD datasets  
317 contained 8,323 SNPs from 175 *Stolothrissa* samples and 12,657 SNPs from 281 *Limnothrissa*  
318 samples. The final dataset for the combined species approach contained 35,966 SNPs.

319

320 *Population structure*

321 Principal component analysis revealed two distinct genetic clusters in each species (Fig 2A). These  
322 clusters correspond to sexes identified through sexing of individuals by dissection (Fig 2A and Table  
323 S1). In a DAPC to identify the loci underlying the strong genetic differentiation of the sexes for  
324 *Stolothrissa*, we visually selected a loadings cut off of 0.0009 on PC1 (Fig S1), which resulted in a total  
325 of 369 (4.4%) significant SNPs distributed over 123 scaffolds with high loadings on sex difference. In  
326 *Limnothrissa*, we selected a cut off of 0.0016 on PC1 based on the distribution of loadings (Fig S2).  
327 This cut off resulted in 218 (1.7%) SNPs across 85 scaffolds with high loadings on sex differences. All  
328 of these loci show an excess of homozygosity in females and an excess of heterozygosity in males (Fig  
329 2C and 2E).

330 The sampling sites generally had similar levels of genetic diversity ( $\Theta_w$ ) for both species (Table 2,  
331 Table 3). We found no evidence for significant spatial population structure or isolation by distance  
332 within either *Stolothrissa* or *Limnothrissa* (Fig 3A). Within *Stolothrissa*, we found little evidence for  
333 additional genetic structure beyond the genetic structure linked to sex (Fig 3B). In contrast, we find  
334 very strong genetic structure within each sex in *Limnothrissa* (Fig 3C), suggesting the existence of  
335 three distinct genetic groups of *Limnothrissa* in Lake Tanganyika. However, these three groups do not  
336 correspond to geographic location where the fish were sampled.

337

338 *Evidence for a segregating inversion in Limnothrissa*

339 *Limnothrissa* from Lake Kivu are divergent from individuals in Lake Tanganyika, but this  
340 differentiation is weaker than that between the three groups observed within Lake Tanganyika (Fig  
341 3C). The *Limnothrissa* individuals from Lake Kivu form additional clusters that are distinct from, but  
342 parallel to, the Tanganyika clusters along the second and third PC axis (Fig 3C). Within Lake

343 Tanganyika, we found individuals of all three clusters at single sampling sites, and there is no clear  
344 geographic signal to these groups (Fig 3C). DAPC analysis of the two most differentiated groups  
345 within Lake Tanganyika identified 25 SNPs across 15 scaffolds with high loadings ( $> 0.006$ ; Fig 4C and  
346 S3). Among these SNPs with high loadings, we found that two clusters of *Limnothrissa* individuals  
347 were predominantly homozygous for opposite alleles, while the third group consisted of  
348 heterozygotes at these loci (Fig. 4D). This suggests that the three distinct genetic groups we observe  
349 are due to a segregating inversion, with two of the groups representing homokaryotypes and the  
350 third a heterokaryotype for these SNPs (Fig 4 and S3).

351 With this suggestion of a segregating inversion within *Limnothrissa*, we tested for Hardy-Weinberg  
352 equilibrium among the three groups within the lake as a whole and at each sampling site individually  
353 (Fig 5). In Lake Tanganyika, all sampling sites, regions, and the lake as a whole were in HWE ( $X^2$ ,  $p >$   
354  $0.05$ ), while Lake Kivu frequencies differed significantly from HWE ( $X^2$ ,  $p = 0.005$ ) (Fig 5A and 5B). We  
355 additionally found that the proportions of all three karyotype groups differed significantly between  
356 Lake Kivu fish and the fish found in each of the north, middle (Mahale), and south basins in Lake  
357 Tanganyika ( $p = 0.012$ ,  $p = 0.0036$ ,  $p << 0.001$ ) (Fig 5B). This result seems to be driven by a much  
358 higher frequency of genotype group 3 in Lake Kivu samples than was found in Lake Tanganyika (Fig  
359 5B). The only difference between the three basins within Lake Tanganyika was that the northern  
360 basin had a greater frequency of fish with genotype group 3 than either the Mahale or southern  
361 basins ( $p = 0.025$ ; all others  $p > 0.05$ ) (Fig 5B).

362

### 363 *Linkage disequilibrium among identified loci*

364 The distribution of pairwise linkage disequilibrium values among loci in the species-specific and  
365 species-combined datasets were highly right-skewed, with the majority of loci pairs having low to no  
366 linkage (mean  $R^2 = 0.009$ ) (Fig 6). In contrast, the subsets of loci identified as sex-linked in *Stolothrissa*

367 and *Limnothrissa* had mean pairwise LD values of 0.858 and 0.844, respectively (Fig 6), suggesting  
368 that these sets of loci are more tightly linked than expected based on the distribution of LD values for  
369 all loci (Mann-Whitney test; *Stolothrissa*  $W = 1167300000$ ,  $p \ll 0.001$ ; *Limnothrissa*  $W = 202550000$ ,  
370  $p \ll 0.001$ ). In *Limnothrissa*, the group-delineating loci had a mean pairwise LD of 0.734, suggesting  
371 that they are also more linked than expected for random loci (Mann-Whitney test,  $W =$   
372  $23862000000$ ,  $p \ll 0.001$ ), but less tightly linked than the sex-linked loci (Mann-Whitney test,  $W =$   
373  $1862600$ ,  $p \ll 0.001$ ).

374

#### 375 *No overlap of sex linked loci in the two sardine species*

376 To test if the sex-linked loci overlap between the species, we used the species-combined dataset to  
377 perform DAPC between sexes for each species individually and identified loci with high loadings.  
378 Using this approach, we identified 570 SNPs across 133 scaffolds in *Stolothrissa* (loading  $> 0.0006$ ; Fig  
379 S4) and 334 SNPs across 91 scaffolds in *Limnothrissa* linked to sex (loading  $> 0.001$ ; Fig S5). These two  
380 sets of loci were completely non-overlapping, suggesting that the sex-linked loci are unique in each  
381 species. In addition, the scaffolds on which these loci were located were non-overlapping between  
382 the species, suggesting that the discrepancy between identified loci is not simply due to different  
383 coverage of the reference genome between *Stolothrissa* and *Limnothrissa* data. When looking at  
384 *Stolothrissa* sex-linked SNPs in *Limnothrissa* individuals, only 2.5% are polymorphic, and only 0.8% of  
385 *Limnothrissa* sex-linked SNPs are polymorphic in *Stolothrissa*. In addition, the sex loci for each species  
386 do not show the same patterns of heterozygosity in the opposite species (Fig S6).

387

#### 388 **Discussion**

389 Little to no spatial genetic structuring is a relatively common observation in pelagic fish species with  
390 continuous habitats (e.g. Canales-Aguirre *et al.* 2016; Hutchinson *et al.* 2001; Momigliano *et al.*



391 2017). However, many studies show that pelagic fish species harbour genetic structure that does not  
392 correspond with geographic distance, but instead correlates with ecological adaptation (Berg *et al.*  
393 2017; Kirubakaran *et al.* 2016; Roesti *et al.* 2015). We present here the largest genomic data sets  
394 analysed for the two freshwater sardines of Lake Tanganyika to date. We did not find evidence for  
395 spatial genetic structure in *Stolothrissa* or *Limnothrissa* of Lake Tanganyika (Fig 3), despite the  
396 immense size of this lake and extensive geographic sampling of populations of both species. Instead,  
397 we find evidence for the existence of many sex-linked loci in both *Stolothrissa* and *Limnothrissa*,  
398 including strong deviations from expected heterozygosity at these loci, with males being the  
399 heterogametic sex (Fig 2). In *Limnothrissa*, we additionally find three cryptic genetic groups, and  
400 patterns in heterozygosity indicate the presence of a segregating chromosomal inversion underlying  
401 this genetic structure (Fig 4). All three inversion genotypes (homokaryotypes and heterokaryotype)  
402 appear in *Limnothrissa* from both Lake Tanganyika and Lake Kivu, but relative frequencies of the  
403 karyotypes differ among these populations (Fig 5).

404

#### 405 *Genetic sex differentiation in both species*

406 According to the canonical model of sex chromosome evolution, development of sex chromosomes  
407 initiates with the appearance of a sex-determining allele in the vicinity of loci only favourable for one  
408 of the sexes. Mechanisms reducing recombination, such as inversions, support the spread of the sex-  
409 determining allele in combination with the sexually antagonistic region due to high physical linkage.  
410 Eventually neighbouring regions also reduce recombination rate and further mutations accumulate,  
411 leading to the formation of a new sex chromosome (Bachtrog 2013; Gammerdinger & Kocher 2018;  
412 Wright *et al.* 2016). Examples range from ancient, highly heteromorphic sex chromosomes, to recent  
413 neo-sex chromosomes, which are found in mammals (Cortez *et al.* 2014), avian species (Graves  
414 2014), and fishes (Feulner *et al.* 2018; Gammerdinger *et al.* 2018; Gammerdinger & Kocher 2018;

415 Kitano & Peichel 2012; Pennell *et al.* 2015; Roberts *et al.* 2009; Ross *et al.* 2009; Yoshida *et al.* 2014).

416 Our results suggest that sex-linked regions of the genome in both *Stolothrissa* and *Limnothrissa* are

417 large and highly differentiated between males and females (Fig. 2). The results from our analyses of

418 linkage disequilibrium suggest that these loci are more tightly linked in both *Limnothrissa* and

419 *Stolothrissa* than SNP loci are on average (Fig 6). The high number of loci implicated in these genetic

420 sex differences, and high linkage among those loci, in addition to clear patterns of excess

421 heterozygosity in males and homozygosity in females, give strong indication of the existence of large

422 sex-determining regions in these species, which may form distinct sex chromosomes. However, the

423 structural arrangement of these loci remains unclear with our current reference genome. It is worth

424 noting that the assembly of sex chromosomes remains challenging due to the haploid nature of sex

425 chromosomes and therefore reduced sequencing depth, and existence of ampliconic and repetitive

426 regions and a high amount of heterochromatin (Tomaszkiewicz *et al.* 2017). Such challenges with

427 assembling sex chromosomes may lead to many scaffolds being implicated in sex determination in

428 initial attempts at assembly, as we see in our analysis, even if these species actually have distinct sex

429 chromosomes.

430 We also show that *Stolothrissa* and *Limnothrissa* SNPs linked to sex are entirely distinct, representing

431 strong evidence for rapid evolution in these sex-linked regions (Fig S1 and S2). This means that if the

432 common ancestor of these species had a sex-determining region, the variants on this sex-linked

433 region have entirely turned over and become distinct in the two species, during the approximately

434 eight million years since these species diverged (Wilson *et al.* 2008). Rapid turnover of sex

435 chromosomes in closely related species are known from a diversity of taxa (e.g. (Jeffries *et al.* 2018;

436 Kitano & Peichel 2012; Ross *et al.* 2009; Tennessen *et al.* 2018). The proposed mechanisms leading to

437 such rapid turnover rates are chromosomal fusions of an autosome with an already existing sex

438 chromosome, forming a “neo sex chromosome” (Kitano & Peichel 2012; Ross *et al.* 2009) or the

439 translocation of sex loci from one chromosome to another (Tennessen *et al.* 2018). Understanding

440 the mechanisms responsible for the high turnover rate of the sex chromosomes in the Tanganyikan  
441 freshwater sardines is a fascinating area for future research.

442 Furthermore, it will be important for future work to investigate if the strong differentiation between  
443 the sexes might also be associated with adaptive differences between the sexes. Ecological  
444 polymorphism among sexes is known in fishes (Culumber & Tobler 2017; Laporte *et al.* 2018; Parker  
445 1992) and can be ecologically as important as differences between species (Start & De Lisle 2018).

446 It is worth noting that the strong sex-linked genetic differentiation in *Limnothrissa* and *Stolothrissa*  
447 could have been mistaken for population structure had we filtered our data for excess heterozygosity  
448 without first examining it, and had we not been able to carefully phenotypically sex well-preserved,  
449 reproductively mature individuals of both species to confirm that the two groups in each species do  
450 indeed correspond to sex (Table S1, Fig 2A). Because of the strong deviations from expected  
451 heterozygosity at sex-linked loci, any filtering for heterozygosity would remove these loci from the  
452 dataset, explaining why one previous study in *Stolothrissa* using RADseq data (De Keyzer *et al.* 2019)  
453 did not clearly identify this pattern despite its prevalence in the genome. For organisms with  
454 unknown sex determination systems, and for whom sex is not readily identifiable from phenotype,  
455 there is danger in conflating biased sampling of the sexes in different populations with population  
456 structure in genomic datasets (e.g. Benestan *et al.* 2017). This underscores the importance of sexing  
457 sampled individuals whenever possible when sex determination systems are unknown, when  
458 analyzing large genomic datasets. The phenotypic and genetic sex of the sardine samples were in  
459 agreement in all individuals except one *Stolothrissa* sample (Table S1, sample 138863.IKO02). This  
460 fish was phenotypically identified as a male but genetically clustered with female individuals. We  
461 believe that this individual was not yet fully mature, and therefore was misidentified phenotypically.

462

463 *No spatial genetic structure in Limnothrissa but cryptic diversity in sympatric Limnothrissa:*

464 Our results reveal the existence of three distinct genetic groups of *Limnothrissa*. Intriguingly, we find  
465 all three of these groups together within the same sampling sites, and even within the same single  
466 school of juvenile fishes (Fig S7). Given patterns of heterozygosity at loci that have high loadings for  
467 distinguishing among the genetic clusters (Fig 4D) together with the strong linkage (Fig 4E), this  
468 structure is consistent with a chromosomal inversion. Chromosomal inversions, first described by  
469 Sturtevant (1921), reduce recombination in the inverted region because of the prevention of  
470 crossover in heterogametic individuals (Cooper 1945; Kirkpatrick 2010; Wellenreuther & Bernatchez  
471 2018). Mutations in these chromosomal regions can therefore accumulate independently between  
472 the inverted and non-inverted haplotype. Although early work on chromosomal inversions in  
473 *Drosophila* has a rich history in evolutionary biology (Kirkpatrick 2010), inverted regions have  
474 recently been increasingly detected with the help of new genomic sequencing technologies in many  
475 species (e.g. Berg *et al.* 2017; Christmas *et al.* 2018; Kirubakaran *et al.* 2016; Lindtke *et al.* 2017;  
476 Zinzow-Kramer *et al.* 2015), with implications for the evolution of the populations with distinct  
477 inversion haplotypes. In *Limnothrissa*, the strong genetic divergence between the two inversion  
478 haplotypes (Fig 3C, 4A and 4B) is consistent with this pattern, and indeed the substantial  
479 independent evolution of these haplotypes is how the inversion is readily apparent even in a RADseq  
480 dataset. The divergence of the haplotypes, and the high frequency of both of these haplotypes,  
481 indicates that this inversion likely did not appear recently, although its apparent absence in  
482 *Stolothrissa* indicates it has arisen since the divergence of these sister taxa eight million years ago  
483 (95% reliability interval: 2.1–15.9 MYA; (Wilson *et al.* 2008)).

484 Given that both inversion haplotypes appear in relatively high numbers, it seems unlikely that drift  
485 alone could explain the rise of the inversion haplotype to its current frequencies in the *Limnothrissa*  
486 population. We expect that *Limnothrissa* have sustained large effective population sizes through  
487 much of their evolutionary history since their split with *Stolothrissa*, meaning that drift would have  
488 been a continually weak force. Although selection against inversions might occur due to an

489 inversion's disruption of meiosis or gene expression due to the position of the breakpoints  
490 (Kirkpatrick 2010), selection may also act on inversions when they carry alleles that themselves are  
491 under selection.

492 Due to the reduced recombination rates in inversions, these regions of the genome provide  
493 opportunities for local or ecological adaptation despite ongoing gene flow (Kirkpatrick & Barton  
494 2006). It is unclear given current data whether the inversion that we describe here in *Limnothrissa* is  
495 tied to differential ecological adaptation. When we examine frequencies of the inversion karyotypes  
496 pooled across all sampled populations, the observed frequencies do not differ from Hardy-Weinberg  
497 expectations (chi-square = 3.51; p-value = 0.06). However, the Lake Kivu population does show  
498 deviation from HWE (chi-square = 7.74; p-value = 0.005) when we examine sampled populations  
499 individually. Furthermore, frequencies of the inversion karyotypes among sampled populations  
500 differ: the proportions of all three karyotypes differ significantly between Lake Kivu and Lake  
501 Tanganyika populations, and within Lake Tanganyika, one of the homokaryotypes (represented as  
502 group 3 in Fig 5), has a higher frequency in the northern basin than in the middle or southern basins  
503 (Fig 5). In Lake Tanganyika, the southern and northern basin differ substantially in nutrient  
504 abundance and limnological dynamics, and the Mahale Mountain (middle) region represents the  
505 geographical transition between the two basins (Bergamino *et al.* 2010; Kraemer *et al.* 2015; Plisnier  
506 *et al.* 1999; Plisnier *et al.* 2009). Thus, it is plausible that differential ecological selection could be  
507 driving differences in the frequencies of the inversion karyotypes spatially within the lake. Genetic  
508 drift is another possibility to explain the spatial differences in frequencies, and although this is highly  
509 plausible in explaining the frequency differences between Lake Tanganyika and Lake Kivu (see  
510 below), given the lack of spatial genetic structure in Lake Tanganyika it seems a less likely explanation  
511 within this lake. Greater understanding of the ecology of these fishes in the north and the south of  
512 Lake Tanganyika, and assessment of the genes within the inverted region, is needed to clarify this  
513 question.

514 *Comparing Limnothrissa populations in Lake Tanganyika to that introduced to Lake Kivu*

515 We found substantial divergence between *Limnothrissa* in their native Lake Tanganyika and the  
516 introduced population in Lake Kivu. This could derive from founder effects, from drift within this  
517 population since their introduction in the absence of gene flow with the Lake Tanganyika population,  
518 or from adaptive evolution in the Lake Kivu population since their introduction to this substantially  
519 different lake environment. Future studies should examine these possibilities with a larger sample of  
520 individuals from Lake Kivu. We identified individuals in Lake Kivu with all three inversion genotypes  
521 that were detected in Lake Tanganyikan fish, suggesting that the inversion is also segregating in Lake  
522 Kivu, and that the founding individuals likely harboured this genetic variation. That said, the  
523 frequency of the karyotypes in Lake Kivu strongly deviates from Hardy-Weinberg expectations (Chi-  
524 square =7.74; p-value =0.005). This suggests that the inversion locus may be under directional  
525 selection. This finding is in contrast with frequent expectations for the behaviour of inversions:  
526 typically, one would predict some sort of balancing selection (e.g. negative frequency dependent  
527 selection) to maintain inversion haplotype diversity (Wellenreuther & Bernatchez 2018). Another  
528 possibility is that the inversion locus is linked to non-random mating in the Kivu population. In  
529 addition, the strong difference in the frequencies of the inversion haplotypes compared to Lake  
530 Tanganyika populations has also likely been influenced by founder effects. *Limnothrissa* were  
531 introduced to Lake Kivu in the 1950s (Hauser *et al.* (1995), and all introduced fish were brought from  
532 the northern part of Lake Tanganyika. The homokaryotype, represented as group 3, is the prevalent  
533 karyotype in Lake Kivu, and this karyotype also appears in highest frequencies in our samples from  
534 northern Lake Tanganyika sites (Fig 5). Thus, it is plausible that founder effects could have led to the  
535 increased frequency of this karyotype within the Lake Kivu population. This origin, however, does not  
536 explain current deviations from HWE given that the population was introduced decades ago.

537 *Conclusions*

538 Genomic data from *Stolothrissa* and *Limnothrissa* reveal an interesting array of unexpected patterns  
539 in chromosomal evolution. Modern fisheries management seeks to define locally adapted,  
540 demographically independent units. We do not find significant spatial genetic structure within these  
541 two freshwater sardine species from Lake Tanganyika. The genetic structure we find is all in  
542 sympatry, namely as strong genetic divergence between the sexes, and evidence of a segregating  
543 inversion in *Limnothrissa*. Further research should focus on the potential for adaptive differences  
544 between the sexes and between the inversion genotypes in *Limnothrissa*. Such work will contribute  
545 to better understanding the role that these key components of the pelagic community assume in the  
546 ecosystem of this lake, which provides important resources to millions of people living at its shores.

547

#### 548 Acknowledgements

549 This work was funded by the Swiss National Science Foundation (grant CR23I2-166589), a grant from  
550 The Nature Conservancy to CEW and PBM, and start-up funding from the University of Wyoming to  
551 CEW. CEW was partially supported by NSF grant DEB-1556963. Computing was accomplished with an  
552 allocation from the University of Wyoming's Advanced Research Computing Center, on its Teton Intel  
553 x86\_64 cluster (<https://doi.org/10.15786/M2FY47>) and the Genetic Diversity Center (GDC) of ETH  
554 Zürich. Special thanks go to Mupape Mukuli, for facilitating logistics during fieldwork and to the crew  
555 of the MV Maman Benita. We thank the whole team at the Tanzanian Fisheries Research Institute for  
556 their support. A special thank goes to Mary Kishe for her support during fieldwork permission  
557 processes and to the Tanzanian Commission for Science and Technology (COSTECH) for their support  
558 of this project through permits allowing us to do research in Tanzania. Thanks to Mark Kirkpatrick  
559 and his lab group for enlightening discussion regarding the interpretation of these data, and to the  
560 Wagner lab at the University of Wyoming, and the FishEc group at EAWAG, especially Kotaro Kagawa  
561 and Oliver Selz, for helpful discussion.

#### 562 References

- 563 Andrews S (2010) FASTQC. A quality control tool for high throughput sequence data.  
564 Bachtrog D (2013) Y-chromosome evolution: emerging insights into processes of Y-chromosome  
565 degeneration. *Nat Rev Genet* **14**, 113-124.  
566 Baird NA, Etter PD, Atwood TS, *et al.* (2008) Rapid SNP discovery and genetic mapping using  
567 sequenced RAD markers. *PLoS One* **3**.  
568 Belgrano A, Fowler CW (2011) *Ecosystem-based management for Marine Fisheries: An evolving*  
569 *perspective*.  
570 Benestan L, Moore JS, Sutherland BJG, *et al.* (2017) Sex matters in massive parallel sequencing:  
571 Evidence for biases in genetic parameter estimation and investigation of sex determination  
572 systems. *Mol Ecol* **26**, 6767-6783.  
573 Berg PR, Star B, Pampoulie C, *et al.* (2017) Trans-oceanic genomic divergence of Atlantic cod ecotypes  
574 is associated with large inversions. *Heredity (Edinb)* **119**, 418-428.



- 575 Bergamino N, Horion S, Stenuite S, *et al.* (2010) Spatio-temporal dynamics of phytoplankton and  
576 primary production in Lake Tanganyika using a MODIS based bio-optical time series. *Remote*  
577 *Sensing of Environment* **114**, 772-780.
- 578 Botsford LW, Castilla JC, Peterson CH (1997) The Management of Fisheries and Marine Ecosystems.  
579 *Science* **277**, 509-515.
- 580 Canales-Aguirre CB, Ferrada-Fuentes S, Galleguillos R, Hernandez CE (2016) Genetic Structure in a  
581 Small Pelagic Fish Coincides with a Marine Protected Area: Seascape Genetics in Patagonian  
582 Fjords. *PLoS One* **11**, e0160670.
- 583 Catchen J, Hohenlohe PA, Bassham S, Amores A, Cresko WA (2013) Stacks: an analysis tool set for  
584 population genomics. *Mol Ecol* **22**, 3124-3140.
- 585 Christmas MJ, Wallberg A, Bunikis I, *et al.* (2018) Chromosomal inversions associated with  
586 environmental adaptation in honeybees. *Mol Ecol*.
- 587 Cohen AS, Gergurich EL, Kraemer BM, *et al.* (2016) Climate warming reduces fish production and  
588 benthic habitat in Lake Tanganyika, one of the most biodiverse freshwater ecosystems. *Proc*  
589 *Natl Acad Sci U S A* **113**, 9563-9568.
- 590 Cohen AS, Soreghan MJ, Scholz CA (1993) Estimating the age of formation of lakes: an example from  
591 Lake Tanganyika, East African Rift system. *Geology* **21**, 511-514.
- 592 Collart A (1960) L'introduction du *Stolothrissa tanganicae* (Ndagala) au Lac Kivu. *Bulletin Agricole du*  
593 *Congo Belge*, 975-985.
- 594 Collart A (1989) Introduction et acclimatation de l'isambaza au Lac Kivu. Seminaire "Trente ans apres  
595 l'introduction l'isambaza au Lac Kivu". In: *FAO Report*, Gisenyi.
- 596 Connallon T, Olito C, Dutoit L, *et al.* (2018) Local adaptation and the evolution of inversions on sex  
597 chromosomes and autosomes. *Philos Trans R Soc Lond B Biol Sci* **373**.
- 598 Cooper KW (1945) NORMAL SEGREGATION WITHOUT CHIASMATA IN FEMALE DROSOPHILA  
599 MELANOGASTER *Genetics* **30**, 472-484.
- 600 Cortez D, Marin R, Toledo-Flores D, *et al.* (2014) Origins and functional evolution of Y chromosomes  
601 across mammals. *Nature* **508**, 488.
- 602 Coulter GW (1976) The biology of Lates species (Nile perch) in Lake Tanganyika, and the status of the  
603 pelagic fishery for Lates species and *Luciolates stappersii* (Blgr.). *Journal of Fish Biology* **9**,  
604 235-259.
- 605 Coulter GW (1991) *Lake Tanganyika and its Life* British Museum (Natural History) Cromwell Road,  
606 London SW7 5BD & Oxford University Press, Walton Street, Oxford OX2 6DP.
- 607 Culumber ZW, Tobler M (2017) Sex-specific evolution during the diversification of live-bearing fishes.  
608 *Nature Ecology & Evolution* **1**, 1185-1191.
- 609 Danecek P, Auton A, Abecasis G, *et al.* (2011) The variant call format and VCFtools. *Bioinformatics* **27**,  
610 2156-2158.
- 611 De Keyzer ELR, De Corte Z, Van Steenberge M, *et al.* (2019) First genomic study on Lake Tanganyika  
612 sprat *Stolothrissa tanganicae*: a lack of population structure calls for integrated management  
613 of this important fisheries target species. *BMC Evol Biol* **19**, 6.
- 614 FAO (1995) Management of African inland fisheries for sustainable production. In: *First Pan African*  
615 *Fisheries Congress and Exhibition*. FAO Rome, UNEP, NAIROBI.
- 616 Feulner PGD, Schwarzer J, Haesler MP, Meier JI, Seehausen O (2018) A Dense Linkage Map of Lake  
617 Victoria Cichlids Improved the *Pundamilia* Genome Assembly and Revealed a Major QTL for  
618 Sex-Determination. *G3 (Bethesda)* **8**, 2411-2420.
- 619 Gammerdinger WJ, Conte MA, Sandkam BA, *et al.* (2018) Novel Sex Chromosomes in 3 Cichlid Fishes  
620 from Lake Tanganyika. *J Hered* **109**, 489-500.
- 621 Gammerdinger WJ, Kocher TD (2018) Unusual Diversity of Sex Chromosomes in African Cichlid Fishes.  
622 *Genes (Basel)* **9**.
- 623 Graves JAM (2014) Avian sex, sex chromosomes, and dosage compensation in the age of genomics.  
624 *Chromosome Research* **22**, 45-57.



- 625 Hauser L, Carvalho GR, Pitcher TJ (1995) Morphological and genetic differentiation of the African  
626 clupeid *Limnothrissa miodon* 34 years after introduction to Lake Kivu. *Journal of Fish Biology*  
627 **47**, 127-144.
- 628 Hauser L, Carvalho GR, Pitcher TJ (1998) Genetic population structure in the Lake Tanganyika sardine  
629 *Limnothrissa miodon*. *Journal of Fish Biology* **53**, 413-429.
- 630 Hooper DM, Griffith SC, Price TD (2019) Sex chromosome inversions enforce reproductive isolation  
631 across an avian hybrid zone. *Mol Ecol* **28**, 1246-1262.
- 632 Hutchinson WF (2008) The dangers of ignoring stock complexity in fishery management: the case of  
633 the North Sea cod. *Biol Lett* **4**, 693-695.
- 634 Hutchinson WF, Carvalho GR, Rogers SI (2001) Marked genetic structuring in localised spawning  
635 populations of cod *Gadus morhua* in the North Sea and adjoining waters, as revealed by  
636 microsatellites. *Marine Ecology Progress Series* **223**, 251-269.
- 637 Jeffries DL, Lavanchy G, Sermier R, *et al.* (2018) A rapid rate of sex-chromosome turnover and non-  
638 random transitions in true frogs. *Nat Commun* **9**, 4088.
- 639 Jombart T (2008) adegenet: a R package for the multivariate analysis of genetic markers.  
640 *Bioinformatics* **24**, 1403-1405.
- 641 Jombart T, Devillard S, Balloux F (2010) Discriminant analysis of principal components: a new method  
642 for the analysis of genetically structured populations. *BMC Genetics* **11**, 94.
- 643 Jones FC, Grabherr MG, Chan YF, *et al.* (2012) The genomic basis of adaptive evolution in threespine  
644 sticklebacks. *Nature* **484**, 55-61.
- 645 Kimirei IA, Mgaya YD, Chande AI (2008) Changes in species composition and abundance of  
646 commercially important pelagic fish species in Kigoma area, Lake Tanganyika, Tanzania.  
647 *Aquatic Ecosystem Health and Management* **11**, 29-35.
- 648 Kirkpatrick M (2010) How and Why Chromosome Inversions Evolve. *PLoS Biology* **8**, e1000501.
- 649 Kirkpatrick M, Barton N (2006) Chromosome inversions, local adaptation and speciation. *Genetics*  
650 **173**, 419-434.
- 651 Kirubakaran TG, Grove H, Kent MP, *et al.* (2016) Two adjacent inversions maintain genomic  
652 differentiation between migratory and stationary ecotypes of Atlantic cod. *Mol Ecol* **25**,  
653 2130-2143.
- 654 Kitano J, Peichel CL (2012) Turnover of sex chromosomes and speciation in fishes. *Environ Biol Fishes*  
655 **94**, 549-558.
- 656 Korneliussen TS, Albrechtsen A, Nielsen R (2014) ANGSD: Analysis of Next Generation Sequencing  
657 Data. *BMC Bioinformatics* **15**, 356.
- 658 Korneliussen TS, Moltke I, Albrechtsen A, Nielsen R (2013) Calculation of Tajima's D and other  
659 neutrality test statistics from low depth next-generation sequencing data. *BMC*  
660 *Bioinformatics* **14**, 289.
- 661 Kraemer BM, Hook S, Huttula T, *et al.* (2015) Century-Long Warming Trends in the Upper Water  
662 Column of Lake Tanganyika. *PLoS One* **10**, e0132490.
- 663 Kurki H, Mannini P, Vuorinen I, *et al.* (1999) Macrozooplankton communities in Lake Tanganyika  
664 indicate food chain differences between the northern part and the main basins.  
665 *Hydrobiologia* **407**, 123-129.
- 666 Kuusipalo L (1999) Genetic variation in the populations of pelagic clupeids *Stolothrissa tanganicae*  
667 and *Limnothrissa miodon* and Nile perch (*Lates stappersii*, *L. mariae*) in Lake Tanganyika.  
668 FAO/FINNIDA Research for the Management of the Fisheries of Lake Tanganyika., p. 28p.
- 669 Lamichhaney S, Fuentes-Pardo AP, Rafati N, *et al.* (2017) Parallel adaptive evolution of geographically  
670 distant herring populations on both sides of the North Atlantic Ocean. *Proceedings of the*  
671 *National Academy of Sciences* **114**, E3452-E3461.
- 672 Langmead B, Salzberg SL (2012) Fast gapped-read alignment with Bowtie 2. *Nat Methods* **9**, 357-359.
- 673 Laporte M, Berrebi P, Claude J, *et al.* (2018) The ecology of sexual dimorphism in size and shape of  
674 the freshwater blenny *Salaria fluviatilis*. *Curr Zool* **64**, 183-191.

- 675 Li H, Durbin R (2009) Fast and accurate short read alignment with Burrows–Wheeler transform.  
676 *Bioinformatics* **25**, 1754-1760.
- 677 Li H, Handsaker B, Wysoker A, *et al.* (2009a) The Sequence Alignment/Map format and SAMtools.  
678 *Bioinformatics* **25**, 2078-2079.
- 679 Li H, Handsaker B, Wysoker A, *et al.* (2009b) The Sequence Alignment/Map format and SAMtools.  
680 *Bioinformatics* **25**, 2078-2079.
- 681 Lindtke D, Lucek K, Soria-Carrasco V, *et al.* (2017) Long-term balancing selection on chromosomal  
682 variants associated with crypsis in a stick insect. *Mol Ecol* **26**, 6189-6205.
- 683 Loiseau S, C  zar A, Adgo E, *et al.* (2014) Decadal Trends and Common Dynamics of the Bio-Optical  
684 and Thermal Characteristics of the African Great Lakes. *PLoS One* **9**, e93656.
- 685 Marques DA, Lucek K, Meier JI, *et al.* (2016) Genomics of Rapid Incipient Speciation in Sympatric  
686 Threespine Stickleback. *PLoS Genet* **12**, e1005887.
- 687 Martinez Barrio A, Lamichhaney S, Fan G, *et al.* (2016) The genetic basis for ecological adaptation of  
688 the Atlantic herring revealed by genome sequencing. *Elife* **5**.
- 689 McGlue MM, Lezzar KE, Cohen AS, *et al.* (2007) Seismic records of late Pleistocene aridity in Lake  
690 Tanganyika, tropical East Africa. *Journal of Paleolimnology* **40**, 635-653.
- 691 Mikheenko A, Prjibelski A, Saveliev V, Antipov D, Gurevich A (2018) Versatile genome assembly  
692 evaluation with QUAST-LG. *Bioinformatics* **34**, i142-i150.
- 693 M  ls   H, Reynolds JE, Coenen EJ, Lindqvist OV (1999) Fisheries research towards resource  
694 management on Lake Tanganyika. *Hydrobiologia* **407**, 1-24.
- 695 M  ls   H, Sarvala J, Badende S, *et al.* (2002) Ecosystem monitoring in the development of sustainable  
696 fisheries in Lake Tanganyika. *Aquatic Ecosystem Health and Management* **5**, 267-281.
- 697 Momigliano P, Jokinen H, Fraimout A, *et al.* (2017) Extraordinarily rapid speciation in a marine fish.  
698 *Proceedings of the National Academy of Sciences* **114**, 6074-6079.
- 699 Natri HM, Merila J, Shikano T (2019) The evolution of sex determination associated with a  
700 chromosomal inversion. *Nat Commun* **10**, 145.
- 701 O'Reilly CM, Alin SR, Piisnier PD, Cohen AS, McKee BA (2003) Climate change decreases aquatic  
702 ecosystem productivity of Lake Tanganyika, Africa. *Nature* **424**, 766-768.
- 703 Parker GA (1992) The evolution of sexual size dimorphism in fish. *Journal of Fish Biology*, 1-20.
- 704 Pennell MW, Kirkpatrick M, Otto SP, *et al.* (2015) Y Fuse? Sex Chromosome Fusions in Fishes and  
705 Reptiles. *PLOS Genetics* **11**, e1005237.
- 706 Plisnier PD, Chitamwebwa D, Mwape L, *et al.* (1999) Limnological annual cycle inferred from physical-  
707 chemical fluctuations at three stations of Lake Tanganyika. *Hydrobiologia* **407**, 45-58.
- 708 Plisnier PD, Mgana H, Kimirei I, *et al.* (2009) Limnological variability and pelagic fish abundance  
709 (*Stolothrissa tanganicae* and *Lates stappersii*) in Lake Tanganyika. *Hydrobiologia* **625**, 117-  
710 134.
- 711 Presgraves DC (2008) Sex chromosomes and speciation in *Drosophila*. *Trends in Genetics* **24**, 336-343.
- 712 Pritchard JK, Przeworski M (2001) Linkage Disequilibrium in Humans: Models and Data. *The American*  
713 *Journal of Human Genetics* **69**, 1-14.
- 714 Purcell S, Neale B, Todd-Brown K, *et al.* (2007) PLINK: A Tool Set for Whole-Genome Association and  
715 Population-Based Linkage Analyses. *The American Journal of Human Genetics* **81**, 559-575.
- 716 Qvarnstrom A, Bailey RI (2009) Speciation through evolution of sex-linked genes. *Heredity (Edinb)*  
717 **102**, 4-15.
- 718 Roberts RB, Ser JR, Kocher TD (2009) Sexual Conflict Resolved by Invasion of a Novel Sex Determiner  
719 in Lake Malawi Cichlid Fishes. *Science* **326**, 998-1001.
- 720 Roesti M, Kueng B, Moser D, Berner D (2015) The genomics of ecological vicariance in threespine  
721 stickleback fish. *Nat Commun* **6**, 8767.
- 722 Ross JA, Urton JR, Boland J, Shapiro MD, Peichel CL (2009) Turnover of Sex Chromosomes in the  
723 Stickleback Fishes (*Gasterosteidae*). *PLOS Genetics* **5**, e1000391.

- 724 Sarvala J, Tarvainen M, Salonen K, Mölsä H (2002) Pelagic food web as the basis of fisheries in Lake  
725 Tanganyika: A bioenergetic modeling analysis. *Aquatic Ecosystem Health and Management* **5**,  
726 283-292.
- 727 Start D, De Lisle S (2018) Sexual dimorphism in a top predator (*Notophthalmus viridescens*) drives  
728 aquatic prey community assembly. *Proc Biol Sci* **285**.
- 729 Sturtevant AH (1921) A Case of Rearrangement of Genes in *Drosophila*. *Genetics* **7**, 235-237.
- 730 Tennessen JA, Wei N, Straub SCK, *et al.* (2018) Repeated translocation of a gene cassette drives sex-  
731 chromosome turnover in strawberries. *PLoS Biol* **16**, e2006062.
- 732 Tomaszewicz M, Medvedev P, Makova KD (2017) Y and W Chromosome Assemblies: Approaches  
733 and Discoveries. *Trends Genet* **33**, 266-282.
- 734 van der Knaap M (2013) Comparative analysis of fisheries restoration and public participation in Lake  
735 Victoria and Lake Tanganyika. *Aquatic Ecosystem Health and Management* **16**, 279-287.
- 736 Van der Knaap M, Katonda KI, De Graaf GJ (2014) Lake Tanganyika fisheries frame survey analysis:  
737 Assessment of the options for management of the fisheries of Lake Tanganyika. *Aquatic*  
738 *Ecosystem Health and Management* **17**, 4-13.
- 739 van Zwieten PAM, Roest FC, Machiels MAM, Van Densen WLT (2002) Effects of inter-annual  
740 variability, seasonality and persistence on the perception of long-term trends in catch rates  
741 of the industrial pelagic purse-seine fishery of northern Lake Tanganyika (Burundi). *Fisheries*  
742 *Research* **54**, 329-348.
- 743 Verburg P, Hecky RE (2003) Wind patterns, evaporation, and related physical variables in Lake  
744 Tanganyika, east Africa. *Journal of Great Lakes Research* **29**, 48-61.
- 745 Verburg P, Hecky RE, Kling H (2003) Ecological consequences of a century of warming in Lake  
746 Tanganyika. *Science* **301**, 505-507.
- 747 Wellenreuther M, Bernatchez L (2018) Eco-Evolutionary Genomics of Chromosomal Inversions.  
748 *Trends Ecol Evol* **33**, 427-440.
- 749 Williams JGK, Kubelik AR, Livak KJ, Rafalski JA, Tingey SV (1990) DNA polymorphisms amplified by  
750 arbitrary primers are useful as genetic markers. *Nucleic Acids Research* **18**, 6531- 6535.
- 751 Wilson AB, Teugels GG, Meyer A (2008) Marine incursion: the freshwater herring of Lake Tanganyika  
752 are the product of a marine invasion into west Africa. *PLoS One* **3**, e1979.
- 753 Wright AE, Dean R, Zimmer F, Mank JE (2016) How to make a sex chromosome. *Nature*  
754 *Communications* **7**, 12087.
- 755 Yoshida K, Makino T, Yamaguchi K, *et al.* (2014) Sex Chromosome Turnover Contributes to Genomic  
756 Divergence between Incipient Stickleback Species. *PLOS Genetics* **10**, e1004223.
- 757 Zheng X, Levine D, Shen J, *et al.* (2012) A high-performance computing toolset for relatedness and  
758 principal component analysis of SNP data. *Bioinformatics* **28**, 3326-3328.
- 759 Zinzow-Kramer WM, Horton BM, McKee CD, *et al.* (2015) Genes located in a chromosomal inversion  
760 are correlated with territorial song in white-throated sparrows. *Genes Brain Behav* **14**, 641-  
761 654.

762

### 763 **Data Accessibility Statement**

764 We are happy to make our genetic data, including our reference genome, publically available by  
765 submitting it to the European Nucleotide Archive (ENA). We intend to submit as soon as possible but  
766 by the latest after acceptance of the manuscript.

767

768 Data Accessibility

769 - RAD sequences: will be uploaded to ENA as soon as possible but by the latest after acceptance

770 - Final DNA sequence assembly will be uploaded to ENA as soon as possible but by the latest after  
771 acceptance

772

773

774 Author contributions:

775 JJ: developing and writing SNSF grant, sampling and processing fish, identifying phenotypic sex of  
776 fish, DNA extractions, preparing RAD libraries, data analysis, writing on the manuscript

777 JR: sampling and processing fish, DNA extractions, whole genome assembly, data analysis, writing on  
778 the manuscript

779 PBM: developing grant for The Nature Conservancy, contributing samples, discussing results,  
780 reviewing manuscript

781 IK: developing and writing SNSF grant, facilitating permission processes, providing logistics for  
782 fieldwork, reviewing manuscript

783 EAS: sampling and processing fish, facilitating permission processes, providing logistics for fieldwork,  
784 enable collaboration with Tanzanian fishermen, discussing manuscript, reviewing manuscript

785 JBM: sampling and processing fish, facilitating permission processes, providing logistics for fieldwork,  
786 enable collaboration with Tanzanian fishermen, discussing and reviewing manuscript

787 BW: developing and writing SNSF grant, reviewing and discussing manuscript

788 CD: developing SNSF grant, sampling and processing fish, facilitating logistics during fieldwork,  
789 reviewing manuscript

790 SM: developing SNSF grant, facilitating permission process, RAD library preparation for sequencing,  
791 reviewing manuscript

792 OS: developing and writing SNSF grant, identifying phenotypic sex of fish, facilitating permission  
793 process, reviewing and discussing manuscript

794 CEW: developing and writing SNSF and TNC grants, sampling and processing fish, contributing  
795 samples, whole genome assembly, data analysis, discussing results, writing manuscript, revise  
796 manuscript

797

798

**Table 1.** Fish collected from Democratic Republic of Congo (DRC), Tanzania (TNZ), Zambia (ZM) and Rwanda (RW).

**Number of sequenced individuals**

| <b>Stolothrissa</b> | <b>Limnothrissa</b> | <b>Site</b>      | <b>Country</b> |
|---------------------|---------------------|------------------|----------------|
| 0                   | 21                  | Lake Kivu        | RW             |
| 7                   | 0                   | Kilomoni         | DRC            |
| 15                  | 0                   | Lusenda          | DRC            |
| 5                   | 2                   | Kabimba          | DRC            |
| 15                  | 17                  | Kagunga          | TNZ            |
| 61                  | 49                  | Kigoma           | TNZ            |
| 25                  | 37                  | North Mahale     | TNZ            |
| 6                   | 38                  | South Mahale     | TNZ            |
| 18                  | 11                  | Ikola            | TNZ            |
| 12                  | 61                  | Kipili           | TNZ            |
| 0                   | 41                  | Kasanga          | TNZ            |
| 17                  | 1                   | Mbete            | ZM             |
| 0                   | 13                  | Crocodile Island | ZM             |
| 181 Samples         | 291 Samples         | 13 Sites         | 4 Countries    |





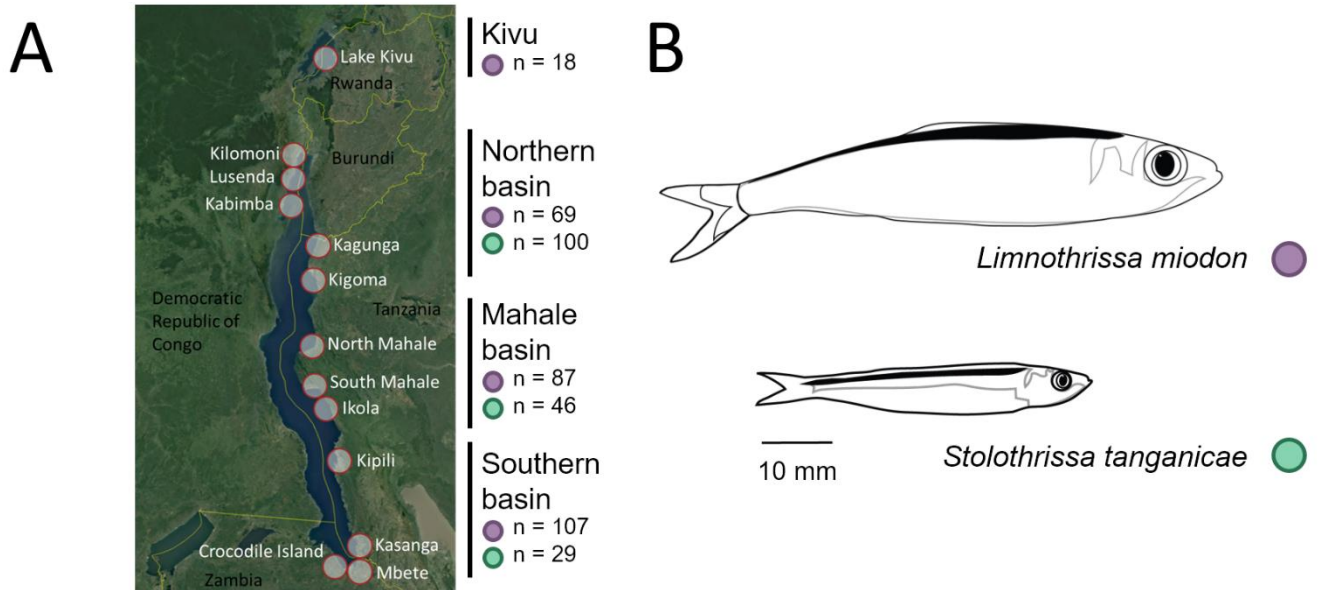

**Figure 1.** (A) Map of Lake Tanganyika, with sampling sites labeled and sample sizes from the three basins within Lake Tanganyika and Lake Kivu indicated for each species. (B) Drawings of *Limnothrissa miodon* and *Stolothrissa tanganicae*, with scale indicated for average mature sizes of the two species. Drawings courtesy of Jimena Golcher-Benavides.



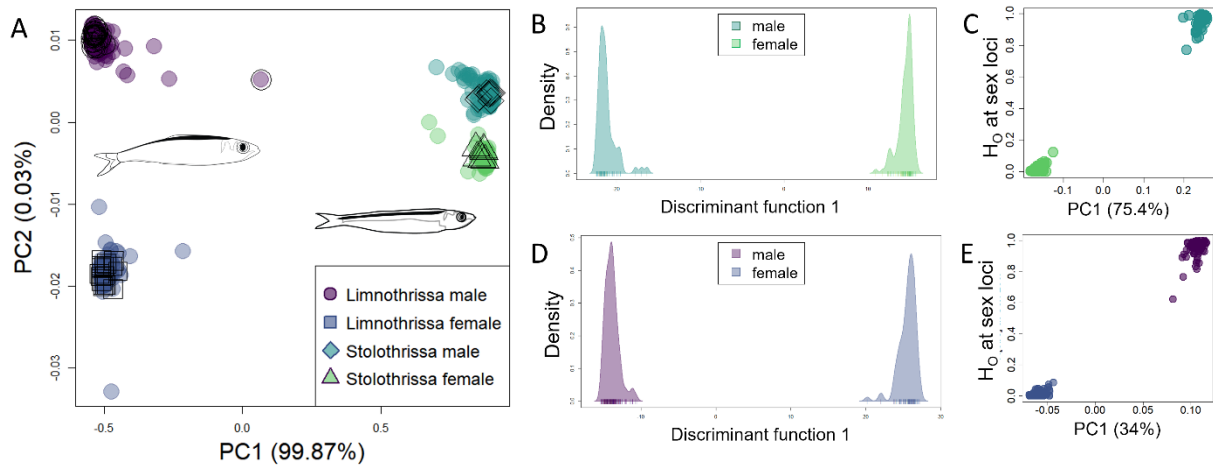

**Figure 2.** (A) Principal component analysis of all *Stolothrissa* and *Limnothrissa* individuals combined, colored by species identity and sex. Empty shapes denote individuals that were dissected and for whom sex was determined phenotypically. These dissection phenotypes group into genetic clusters, and therefore were used to identify the sex of each of the genetic clusters. In the combined PCA, the first axis generally corresponds to species, while the second axis corresponds to sex. Discriminant analysis of principal components (DAPC) results for (B) *Stolothrissa* and (D) *Limnothrissa* demonstrate distinct separation among males and females, with intraspecific differentiation ( $F_{ST}$ ) between the two groups indicated. DAPC was used to identify loci associated with this differentiation (see Supplementary Figure S1 and S2); observed heterozygosity ( $H_{obs}$ ) of each individual at those loci with high loadings is plotted against the first intraspecific PCA axis indicated in (C) for *Stolothrissa* and (E) for *Limnothrissa*, demonstrating both that sex dictates the first axis of differentiation in both species, and that males are the heterogametic sex at these loci in both species. There were 369 significant SNPs differentiating the sexes in *Stolothrissa* and 218 significant SNPs in *Limnothrissa*, with no overlap between the two species.

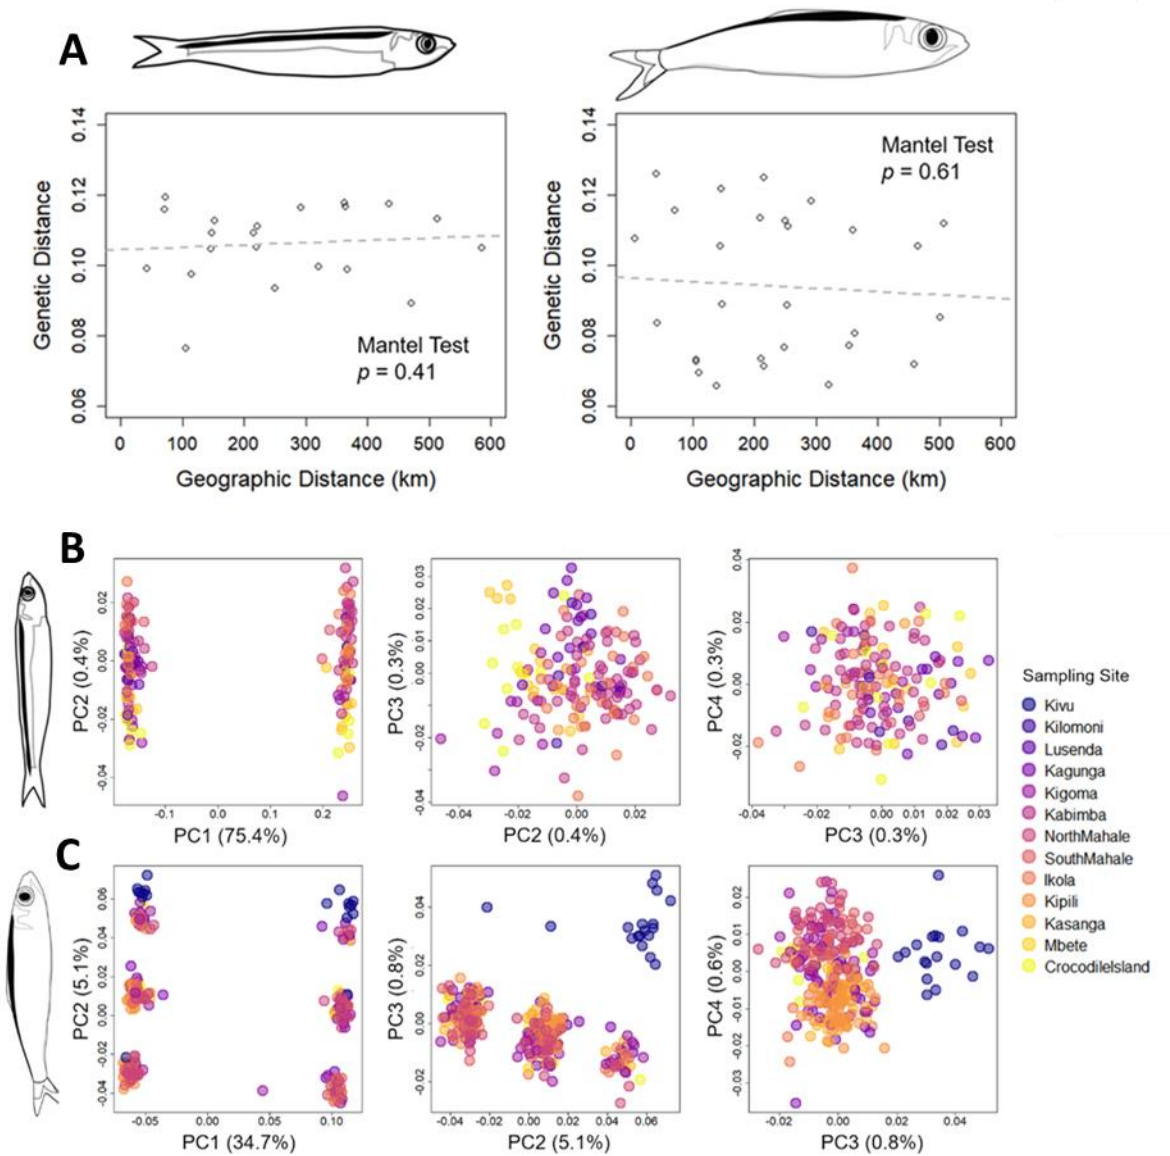

**Figure 3.** (A) shows the relationship between genetic and geographic distance. Neither species has evidence for statistically significant spatial population genetic structure using mantel test. (B) and (C) show Species-specific principal components analysis of *Stolothrissa* and *Limnothrissa* individuals, colored by sampling sites. In both species, PC1 differentiates the sexes; in *Limnothrissa*, PC2 separates each sex into three distinct groups, while PC3 separates individuals from Lake Kivu from those in Lake Tanganyika. Sampling sites are ordered from north (Kivu) to south (Crocodile Island).

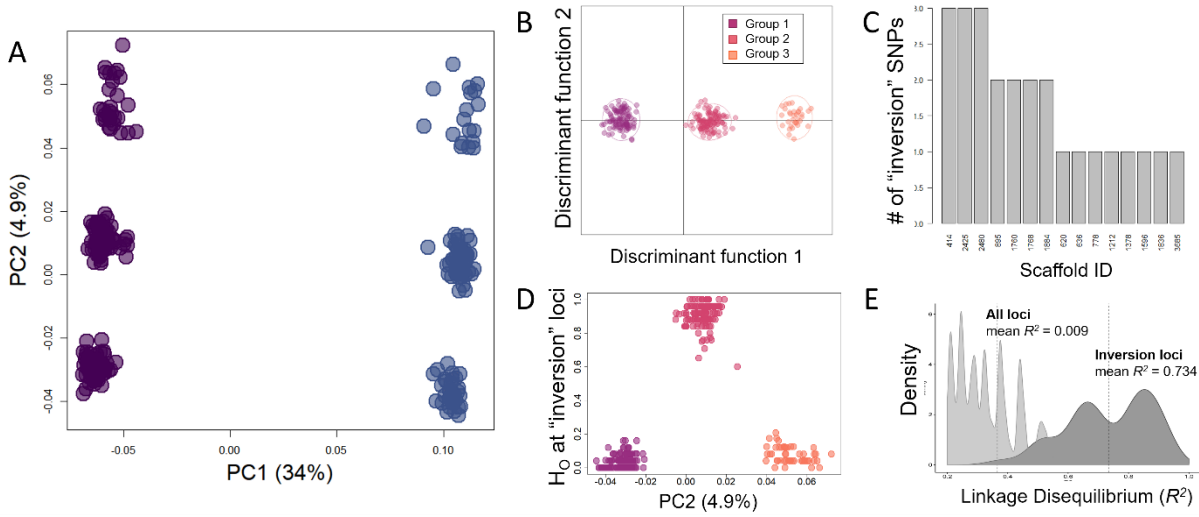

**Figure 4.** Evidence in *Limnothrissa* points to the existence of a segregating inversion. (A) Principal component analysis for all *Limnothrissa* individuals of Lake Tanganyika, demonstrating separation among sexes along the first principal component axis (PC1), and separation into three groups for both males (purple) and females (blue) on the second axis (PC2). For our discriminant analysis of principal components (B), we identified individuals according to these groups, and identified SNPs with high loadings along this axis. (C) Scaffold locations of SNPs with high loadings along this ‘group’ axis, showing that the 25 significant SNPs were found on 15 different scaffolds. At these significant loci, two groups were predominantly homozygous (D), while the third (intermediate) group was generally heterozygous. Despite the fact that these SNPs were spread out across several scaffolds, the distribution of pairwise linkage disequilibrium values (E) between just the inversion loci (dark) has a mean  $R^2 = 0.734$ , whereas the distribution for all loci in the data set for *Limnothrissa* (light) has a mean  $R^2 = 0.009$ .

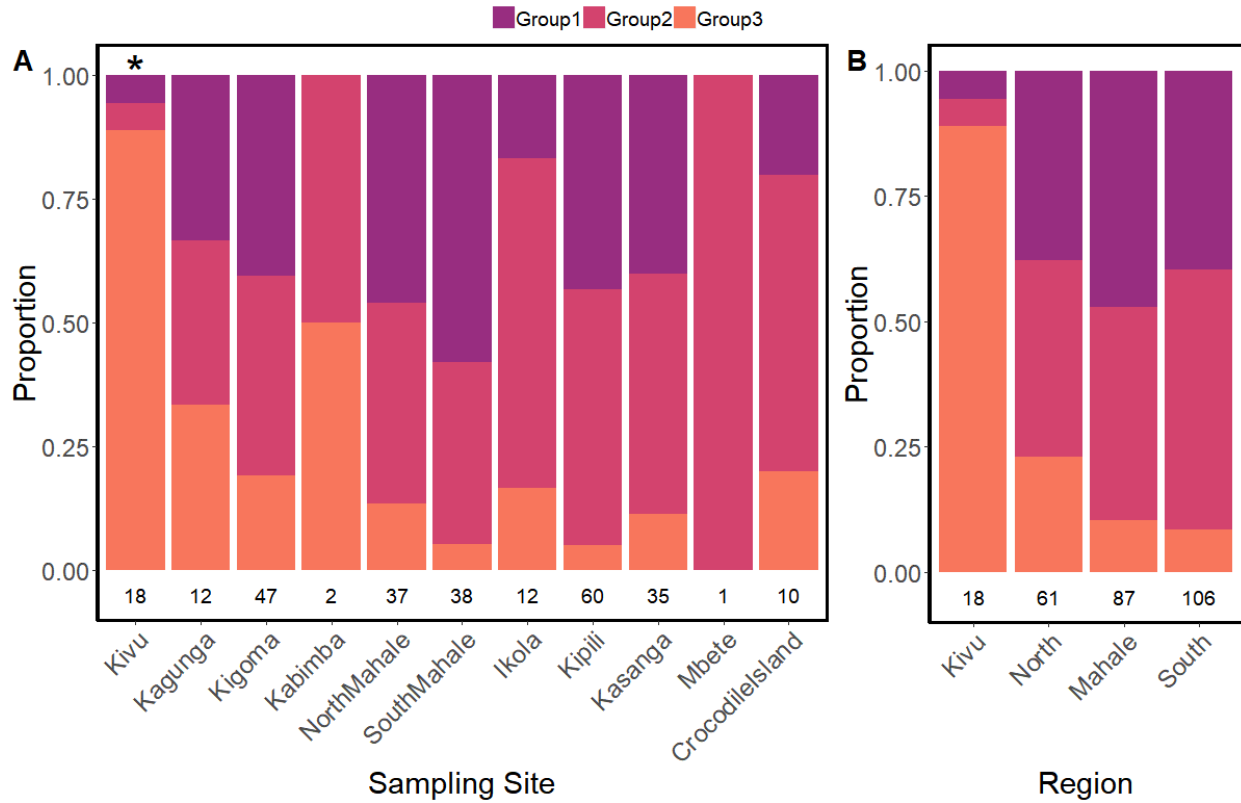

**Figure 5.** Proportion of individuals in each inversion karyotype group, by sampling site (A) and region (B). Sample sizes of individuals retained in analyses at each sampling site are indicated, as well as whether the distribution of the groups at each site differs from expectations under Hardy-Weinberg equilibrium (\* indicates rejection of HWE at the site). Sites are ordered by geographic location, from north (Kivu, Kagunga) to south (Crocodile Island). The relative proportions of each haplotype observed differed significantly between Lake Kivu and all three regions in Lake Tanganyika, while only the relative proportion of Group 3 differed among the three regions within Lake Tanganyika.

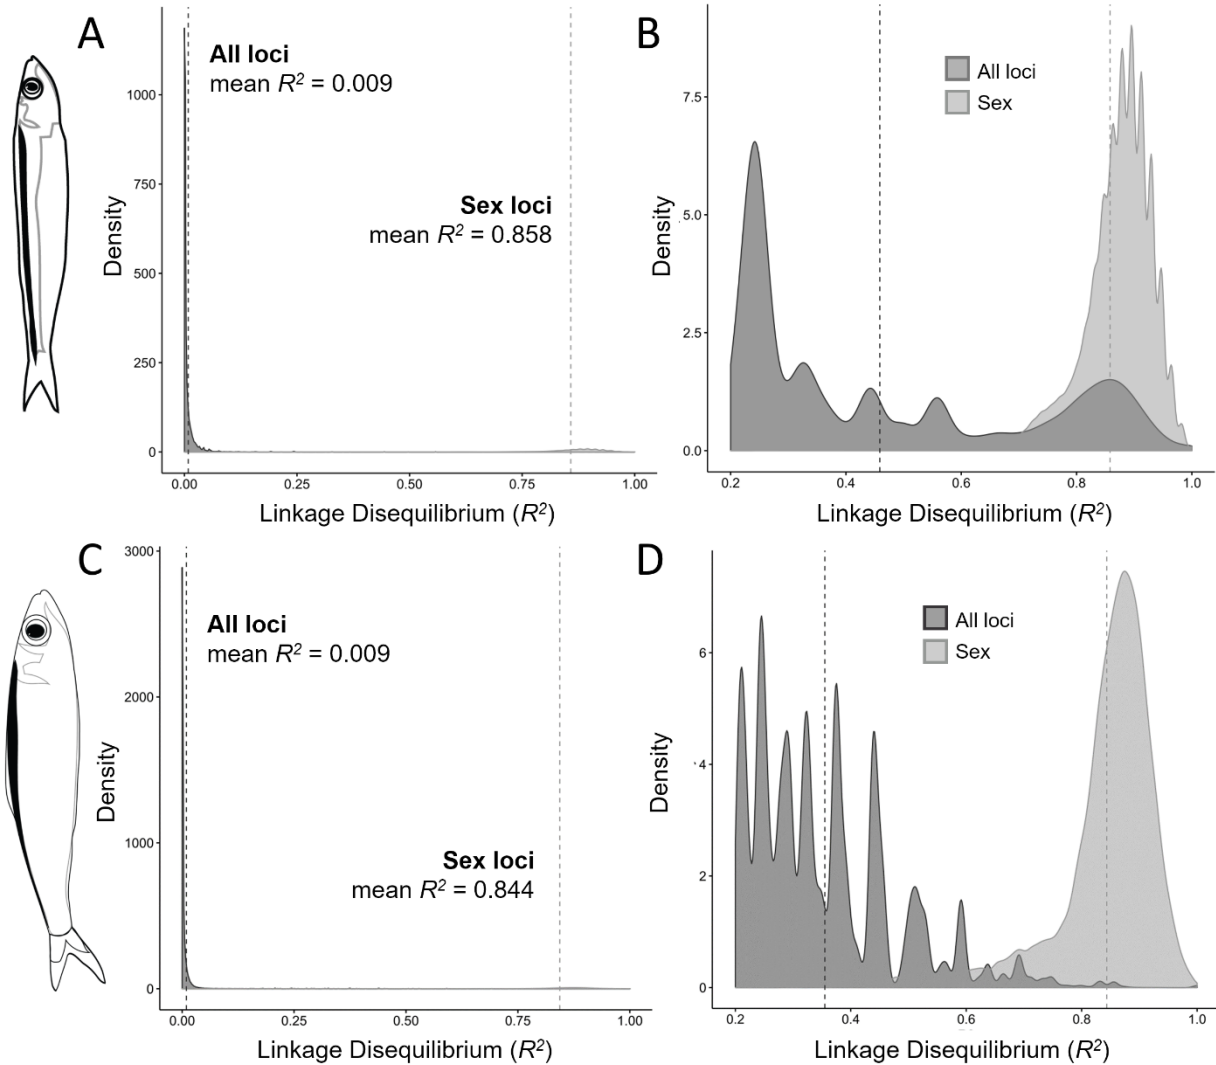

**Figure 6.** Results from an analysis of pairwise linkage disequilibrium (measured as  $R^2$ ) between SNPs in *Stolothrissa* (A-B) and *Limnothrissa* (C-D), demonstrating that loci associated with sex differences (light gray distributions) are more tightly linked than expected based on linkage values for all loci in the species-specific data sets (dark gray distributions). Panels (C) and (D) have been truncated at  $R^2 = 0.2$  to better visualize the distribution of LD values for sex-associated SNPs.
