# Sex differentiation and a chromosomal inversion lead to cryptic diversity in Lake Tanganyika sardines

Julian Junker<sup>\*1,2</sup>, Jessica A. Rick<sup>\*3</sup>, Peter B. McIntyre<sup>4</sup>, Ismael Kimirei<sup>5</sup>, Emmanuel A. Sweke<sup>5,7</sup>, Julieth B. Mosille<sup>5</sup>, Bernhard Wehrli<sup>1,6</sup>, Christian Dinkel<sup>1</sup>, Salome Mwaiko<sup>1,2</sup>, Ole Seehausen<sup>1,2</sup>, Catherine E. Wagner<sup>3</sup>

\* denotes equal contribution

1 EAWAG Swiss Federal Institute of Aquatic Science and Technology, CH-6047 Kastanienbaum, Switzerland

2 Division of Aquatic Ecology, Institute of Ecology & Evolution, University of Bern, CH-3012 Bern, Switzerland

3 Department of Botany and Program in Ecology, University of Wyoming, Laramie, Wyoming 82072 USA

4 Department of Natural Resources, Cornell University, Ithaca NY 14850 USA

5 Tanzania Fisheries Research Institute (TAFIRI), Dar es Salaam, Tanzania

6 Institute of Biogeochemistry and Pollutant Dynamics, ETH Zurich, CH-8092 Zürich, Switzerland

7 Deep Sea Fishing Authority (DSFA), Zanzibar, Tanzania

Corresponding authors: Julian Junker ([Julian.junker@eawag.ch](mailto:Julian.junker@eawag.ch)), Jessica Rick ([jrick@uwyo.edu](mailto:jrick@uwyo.edu)) and Catherine E. Wagner ([Catherine.Wagner@uwyo.edu](mailto:Catherine.Wagner@uwyo.edu))

33  
34  
35  
36  
37  
38  
39  
40  
41  
42  
43  
44  
45  
46  
47  
48  
49  
50  
51  
52  
53  
54  
55  
56  
57  
58

# **Abstract**

Two endemic sardines in Lake Tanganyika, *Limnothrissa miodon* and *Stolothrissa tanganicae*, are important components of the lake’s total annual fishery harvest. These two species along with four endemic *Lates* species represent the dominant species in Lake Tanganyika’s pelagic fish community, in contrast to the complex pelagic communities in nearby Lake Malawi and Victoria. We use reduced representation genomic sequencing methods to gain a better understanding of possible genetic structure among and within populations of Lake Tanganyika’s sardines. Samples were collected along the Tanzanian, Congolese, and Zambian shores, as well as from nearby Lake Kivu, where *Limnothrissa* was introduced in 1959. Our results reveal unexpected cryptic differentiation within both *Stolothrissa* and *Limnothrissa*. We resolve this genetic structure to be due to the presence of large sex-specific regions in the genomes of both species, but involving different polymorphic sites in each species. Additionally, we find a large segregating inversion in *Limnothrissa*. We find all inversion karyotypes throughout the lake, but the frequencies vary along a north-south gradient within Lake Tanganyika, and differ substantially in the introduced Lake Kivu population. Little to no spatial genetic structure exists outside the inversion, even over the hundreds of kilometres covered by our sampling. These genetic analyses show that Lake Tanganyika’s sardines have dynamically evolving genomes, and the analyses here represent a key first step in understanding the genetic structure of the Lake Tanganyika pelagic sardines.

**Keywords:** *Stolothrissa tanganicae*, *Limnothrissa miodon*, Lake Tanganyika, Inversion, sex-specific region

## 59 Introduction

60 Identifying the genetic basis of ecological adaptation is a high priority in evolutionary biology and has  
 61 important implications for population management. Recent research in this field focuses on genomic  
 62 regions with reduced recombination rates, such as chromosomal inversions (e.g. Berg *et al.* 2017;  
 63 Christmas *et al.* 2018; Kirubakaran *et al.* 2016; Lindtke *et al.* 2017), sex chromosome regions  
 64 (Presgraves 2008; Qvarnstrom & Bailey 2009) or both (Connallon *et al.* 2018; Hooper *et al.* 2019;  
 65 Natri *et al.* 2019). The reduced recombination rates in such chromosomal regions enable local  
 66 adaptation even when gene flow is high (Kirkpatrick & Barton 2006). Furthermore, it appears that  
 67 these mechanisms for restricted recombination are more prevalent in sympatric than in allopatric  
 68 species, and fixation of inversions is faster in lineages with high rates of dispersal and gene flow (Berg  
 69 *et al.* 2017). These patterns are consistent with theory in which the presence of gene flow favours  
 70 diversification of chromosomal rearrangements caused by locally adapted loci (Berg *et al.* 2017;  
 71 Kirkpatrick & Barton 2006).

72 Pelagic habitats represent uniform environments that allow for high dispersal rates due to the lack of  
 73 physical barriers. Well known examples of species from pelagic habitats that carry chromosomal  
 74 inversions or sex loci include Atlantic cod (*Gadus morhua*) (Berg *et al.* 2017; Kirubakaran *et al.* 2016),  
 75 Atlantic herring (*Clupea harengus*) (Lamichhaney *et al.* 2017; Martinez Barrio *et al.* 2016) and  
 76 stickleback (*Gasterosteus aculeatus*) (Jones *et al.* 2012). In Atlantic cod and herring populations, low  
 77 genome-wide divergence is interspersed with highly divergent inverted regions. These inversions in  
 78 cod distinguish between resident and migrating ecotypes (Berg *et al.* 2017; Kirubakaran *et al.* 2016),  
 79 and in herring they separate spring and fall spawners (Lamichhaney *et al.* 2017; Martinez Barrio *et al.*  
 80 2016). Additionally, inverted genomic regions in sticklebacks are involved in the divergence between  
 81 lake and stream ecotypes (Marques *et al.* 2016; Roesti *et al.* 2015).

82 From management perspectives, pelagic mixed stocks are notoriously difficult (Belgrano & Fowler  
83 2011; Botsford *et al.* 1997) and part of this challenge lies in identifying Management Units (MUs)  
84 which are demographically independent and genetically distinct populations. In a uniform habitat  
85 without physical barriers, low genetic differentiation is typical, as there exist few environmental  
86 restrictions to gene flow. However, there are increasingly cases where small genomic differences  
87 lead to important variation in life history, influencing population resilience to fishing pressure (Berg  
88 *et al.* 2017; Hutchinson 2008; Kirubakaran *et al.* 2016). The use of next generation sequencing  
89 methods is therefore needed to shed light on population structure, particularly in species with low  
90 genetic differentiation, to facilitate the detection of chromosomal variants which may be linked to  
91 important ecological or local adaptation or selection (Lamichhaney *et al.* 2017). This is because  
92 detailed information on the population structure, ecology and life history of harvested species is  
93 crucial for effective fisheries management.

94 Lake Tanganyika is volumetrically the second largest lake in the world consisting of deep basins in the  
95 north (~1200 m) and south (~1400 m), and a shallower basin (~800 m) in the middle region (Fig 1A)  
96 (McGlue *et al.* 2007). At 9-12 million years in age (Cohen *et al.* 1993), it hosts a long history of  
97 evolution, which has produced remarkable animal communities consisting largely of endemic species  
98 (Coulter 1991). Among these endemics are six fish species which comprise the bulk of the lake's  
99 pelagic fish community. These are two sardines, *Stolothrissa tanganyicae* and *Limnothrissa miodon*,  
100 and four endemic relatives of the Nile perch, *Lates stappersii*, *Lates mariae*, *Lates angustifrons* and  
101 *Lates microlepis*. While little is known about the evolutionary history of the *Lates* species, Wilson *et al.* (2008) showed evidence that the sardines of Lake Tanganyika descend from relatives in western  
102 Africa and diverged from a common ancestor about 8 MYA . The harvest of *Stolothrissa*, *Limnothrissa*  
103 and *L. stappersii* account for up to 95% of all catches within the lake (Coulter 1976, 1991; Mölsä *et al.* 2002), making the second largest inland fishery on the continent of Africa (FAO 1995). The fishing  
104 industry provides employment to an estimated 160'000 (Van der Knaap *et al.* 2014) to 1 million  
105  
106

people (Kimirei *et al.* 2008) and is an important source of protein to additional millions living on the shores of Lake Tanganyika and further inland (Kimirei *et al.* 2008; Mölsä *et al.* 2002; Sarvala *et al.* 2002; Van der Knaap *et al.* 2014). Due to human population growth and an increased demand for protein, fishing pressure has increased during the last decades, resulting in a decline of pelagic fish stocks (Coulter 1991; van der Knaap 2013; Van der Knaap *et al.* 2014; van Zwieten *et al.* 2002). Also, long-term decrease in fish abundance is likely linked to the observed warming of Lake Tanganyika since the early 1900s, and further warming-induced decline in the lake's productivity is expected during the 21<sup>st</sup> century (Cohen *et al.* 2016; O'Reilly *et al.* 2003; Verburg & Hecky 2003; Verburg *et al.* 2003). Consequently, there is increasing recognition of the need to develop sustainable management strategies for the lake's pelagic fish stocks (Kimirei *et al.* 2008; Mölsä *et al.* 1999; Mölsä *et al.* 2002; van der Knaap 2013; Van der Knaap *et al.* 2014; van Zwieten *et al.* 2002).

Despite the economic importance of the pelagic fisheries in this lake, very little previous work has investigated the genetic and phenotypic diversity and population structure of the key pelagic fish species or their evolutionary origins (but see De Keyzer *et al.* 2019; Hauser *et al.* 1995, 1998; Wilson *et al.* 2008). Lake Tanganyika's enormous size and spatial heterogeneity (e.g. Kurki *et al.* 1999; Loiselle *et al.* 2014) harbours the potential for spatial segregation that may lead to temporal differences in spawning and life history timing between distant sites. There are indeed indications of genetically differentiated stocks of some of the pelagic fish of Lake Tanganyika known from basic genetic work conducted two decades ago. For the sardines, these studies found no clear genetic population structure at a large geographical scale (Hauser *et al.* 1998; Kuusipalo 1999), but some small scale differences were found for *Limnothrissa* (Hauser *et al.* 1998). However, the genetic methods used in these older studies (RAPDs and microsatellites) have limited power, are known to suffer from error (RAPD, Williams *et al.* 1990), and in addition, have severe limitations in their resolution. De Keyzer *et al.* (2019) used a modern RAD sequencing approach to examine *Stolothrissa*

and found small, if any, spatial structure in *Stolothrissa* sampled from the north, middle, and south of Lake Tanganyika.

In this study, we focus on both sardine species, sampled from 13 sites spanning from the north to the south of Lake Tanganyika (Fig 1). We also included *Limnothrissa* individuals from the introduced population of this species present in Lake Kivu. Our null hypothesis was extremely simple: the surface water of a large lake is horizontally well mixed and therefore provide a homogeneous habitat. Pelagic fish can move freely and therefore due to the uniform environment, we should expect a lack of genetic structure of their populations due to free interbreeding. Using reduced representation genomic sequencing (RAD, Baird *et al.* 2008) we indeed do not find spatial genetic structure in either species, supporting this null hypothesis. However, many loci deviating from Hardy-Weinberg equilibrium differentiated the sexes in our samples, suggesting that these species have large sex-determining regions. Furthermore, we find additional cryptic diversity in *Limnothrissa* due to genetic patterns consistent with a chromosomal inversion. The generally low spatial genetic structure within these species facilitated the detection of the differentiated loci, which may be related to sex-specific or local adaptation.

## Material and Methods

### *Study system and sampling*

Our samples from Lake Tanganyika come from Tanzanian, Congolese and Zambian sites. Additionally we added Rwandan *Limnothrissa* from Lake Kivu, where the species was introduced during the 1950s (Collart 1960, 1989; Hauser *et al.* 1995) (Fig 1 and Table 1). Each fish was processed according to standard protocols, during which we take a cuvette photograph of the live fish and subsequently euthanize the fish with an overdose of MS222, and take fin clips and muscle tissue samples for genetic analysis and stable isotope analysis, respectively. The specimens are preserved in

formaldehyde and archived in the collections at EAWAG (2016, 2017, 2018 samples), the University of Wyoming Museum of Vertebrates (2015 samples), and the University of Wisconsin- Madison (2015 samples). Many fish for this project were obtained from fishermen and were already dead, and in this case we completed this same protocol without euthanasia.

# *Phenotypic sexing*

Tanganyikan sardines caught by fishermen are frequently dried after being landed at the beach and although this does not inhibit the extraction of high-quality DNA, desiccated individuals cannot be accurately sexed. Therefore, we dissected 34 *Limnothrissa* and 15 *Stolothrissa* that were euthanized and preserved in formalin just after being caught. These individuals were fully mature and in excellent condition to accurately phenotypically sex them. We used these phenotypically sexed individuals to determine whether inferred genetic groups correlated to sex in each species.

# *RAD sequencing*

We extracted DNA from 486 individuals (181 *Stolothrissa*; 291 *Limnothrissa*) and obtained genomic sequence data of these individuals using a reduced-representation genomic sequencing approach (RADseq). Both species were pooled, divided into 10 RAD libraries, and sequenced. The DNA from all individuals was extracted using Qiagen DNeasy Blood and Tissue kits (Qiagen, Switzerland). For 190 individuals collected in 2015, this DNA was then standardized to 20ng/μL at the University of Wyoming, and then prepared for RAD sequencing by Floragenex Inc. (Eugene, Oregon), and sequenced at the University of Oregon on an Illumina HiSeq2000 (100bp SE). Individuals were multiplexed in groups of 95 individuals using P1 adapters with custom 10 base pair barcodes, and fragments between 200 and 400bp were selected for sequencing. In order to avoid library effects, each individual was sequenced in two different libraries and the reads were combined after

sequencing. The other 296 individuals collected in 2016 and 2017 were prepared for sequencing following the protocol by Baird *et al.* (2008) with slight modifications, including using between 400ng and 1000ng genomic DNA per sample and digesting with *SbfI* overnight. We multiplexed between 24 and 67 of these individuals per library and used P1 adapters (synthesized by Microsynth) with custom six to eight base pair barcodes. These six libraries were sheared using an S220 series Adaptive Focused Acoustic (AFA) ultra-sonicator (Covaris Inc. 2012) with the manufacturer's settings for a 500 bp mean fragment size. We selected fragments with a size between 300 and 700bp using a SageElf (Sage Scientific Electrophoretic Lateral Fractionator; Sage Science, Beverly, MA). The enrichment step was done in eight aliquots with a total volume of 200 µl. Volumes were combined prior to a final size selection step using the SageELF. Sequencing was done by the Lausanne Genomic Technologies sequencing facilities of University of Lausanne, Switzerland. We sequenced each of six libraries on a single lane using an Illumina HiSeq2000 (Illumina Inc. 2010) (100bp SE) together with 7–20% bacteriophage PhiX genomic DNA.

### *Sequence data preparation*

We filtered raw sequencing reads from each library by first removing PhiX reads using bowtie2 (Langmead & Salzberg 2012). Then we filtered reads for an intact *SbfI* restriction site, de-multiplexed the fastq file, and trimmed the reads down to 84 nucleotides using process\_radtags from Stacks v1.26 (Catchen *et al.* 2013) and a custom bash script. The FASTX toolkit v.0.0.13 ([http://hannonlab.cshl.edu/fastx\\_toolkit/](http://hannonlab.cshl.edu/fastx_toolkit/)) and custom python scripts were used for quality filtering. In a first step, we kept only reads with 100% of the bases with quality score of at least 10 and in a second step, we removed all reads with at least 5% of the bases with quality score below 30.

### *Assembly to reference genome*



We generated a reference genome from a male *Limnothrissa* individual collected near Kigoma, Tanzania, in 2018. High molecular weight DNA was extracted from fin tissue using the Qiagen HMW gDNA MagAttract Kit, and then libraries were prepared using 10X Genomics Chromium library preparation at the Hudson-Alpha Institute for Biotechnology Genomic Services Laboratory (Huntsville, AL). The sequencing libraries were then sequenced on the Illumina HiSeq Xten platform (150bp PE reads). Read quality was checked using FASTQC (Andrews 2010), and then reads were assembled using 10X Genomics' Supernova assembly software, using a maximum of 500 million reads. Assembly completeness was assessed using QUAST-LG (Mikheenko *et al.* 2018), which computes both standard summary statistics and detects the presence of orthologous gene sequences.

Reads for all *Limnothrissa* and *Stolothrissa* individuals were aligned to the reference genome using BWA mem (Li & Durbin 2009), following the filtering steps discussed above. Alignments were then processed using SAMtools v1.8 (Li *et al.* 2009b). We then identified variable sites in three different groups using SAMtools mpileup and bcftools v1.8 (Li *et al.* 2009a): (1) all individuals; (2) only *Limnothrissa* individuals; and (3) only *Stolothrissa* individuals. We obtained consistent results using different combinations of more stringent and relaxed filtering steps. The results shown here are based on a filtering as follows: within the two monospecific groups, we filtered SNPs using VCFTOOLS (Danecek *et al.* 2011) to allow no more than 50% missing data per site, removed SNPs with a minor allele frequency less than 0.01, included only high-quality variants (QUAL > 19), and retained only biallelic SNPs. For the dataset including both species, we relaxed the missing data filter to allow sites with up to 75% missing data.

*Population genetics and outlier detection*

After removing individuals with more than 25% missing data, we used the combined dataset to conduct principal component analysis (PCA) using the R package SNPrelate (Zheng *et al.* 2012). To delineate and visualize distinct groups, we performed K-means clustering (kmeans in R) on the first five principal component axes. The value for K was chosen using the broken-stick method based on the within-group sums of squares. We then used these groupings to assign individual fish to species and clusters within species. We combined these clustering results with sexed phenotypes to confirm the identity of each of these clusters.

After observing that the primary axis of differentiation in both *Stolothrissa* and *Limnothrissa* was based on sex, we used the single-species SNP datasets and the R package adegenet (Jombart 2008) to conduct discriminant analysis of principal components (DAPC, Jombart *et al.* 2010) on males versus females of *Stolothrissa* and *Limnothrissa* to identify loci contributing to these sex differences. We visually inspected the DAPC loading plots to determine an appropriate threshold for loading significance and pulled out loci with loadings above these thresholds in each species. We then calculated heterozygosity for these sex-associated loci using adegenet in R.

If *Stolothrissa* and *Limnothrissa* have a shared origin of these sex-linked loci, then we would expect them to occur in similar locations in the genome; however, if the sets of significant SNPs are located on different scaffolds for each of the two species, then expect these regions to more likely originate from independent evolution. We therefore checked whether the same genomic regions explain genetic differentiation between sexes in the two species. For this, we compared the location of SNPs identified in each of the *Stolothrissa* and *Limnothrissa* DAPC analyses, both using the species-specific and combined SNP data sets. We assessed the proportion of scaffolds shared among the two sets of significant SNPs. As an additional comparison between the two species, we calculated the proportion of *Limnothrissa* sex-linked SNPs that were polymorphic in *Stolothrissa*, and vice versa, as well as the observed heterozygosity of *Limnothrissa* individuals at *Stolothrissa* sex-linked SNPs, and vice versa.

For each species, we also investigated population structure beyond sex differences to determine whether there is any geographic signal of differentiation within each of the species. For this we removed the sex specific SNPs in the species-specific datasets of both species. In *Limnothrissa* we additionally removed the SNPs linked to the inverted region. We then calculated  $F_{ST}$  between all sampling site pairs using VCFTOOLS (Danecek *et al.* 2011). In addition, we calculated pairwise genetic distances between populations and used these in a Mantel test (using `mantel.randtest()` from `adeigenet` in R) for each species, which tests for an association between genetic distances and Euclidean geographic distances between sites. For the Mantel tests, we used Edwards' Euclidean genetic distance (calculated using `dist.genpop()` from `adeigenet` in R) and omitted Lake Kivu, as well as locations with fewer than 10 samples.

In *Limnothrissa*, the secondary axis of genetic differentiation clearly split the populations into three genetic groups. To investigate the genetic basis of these groupings, we used DAPC to identify the loci with high loadings on the differentiation between the two most extreme groups, using the dataset where variants were called on *Limnothrissa* individually. In addition, we omitted Lake Kivu individuals from this DAPC analysis. Once again, we visually inspected the loading plots to determine an appropriate threshold for significance. We then calculated heterozygosity for these significant loci using `adeigenet` in R.

After assigning all individuals to one of the three distinct groups based on K-means clustering (`kmeans` in R), we counted the frequencies of the three groups at each sampling site. To determine whether the distribution of individuals among the clusters varied between regions in Lake Tanganyika, we conducted a two-proportion z-test (`prop.test()` in R) between the three general regions in Lake Tanganyika, as well as between each of these and Lake Kivu. Because patterns of heterozygosity were consistent with these three groups being determined by a segregating chromosomal inversion, we then tested whether the three genotypes are in Hardy-Weinberg

Equilibrium across all sampling sites, and within distinct geographic regions using the online tool

[www.dr-petrek.eu/documents/HWE.xls](http://www.dr-petrek.eu/documents/HWE.xls)

# *Genetic diversity within and among clusters*

We performed population genetic analyses, including calculating genetic diversity within and divergence between the different intraspecific groups, on the aligned BAM files using ANGSD (Korneliussen *et al.* 2014), again using the *Limnothrissa* genome as a reference. Methods employed in ANGSD take genotype uncertainty into account instead of basing analyses on called genotypes, which is especially useful for low- and medium-depth genomic data (Korneliussen *et al.* 2014), such as those obtained using RAD methods. From these alignment files, we first calculated the site allele frequency likelihoods based on individual genotype likelihoods (option -doSaf 1) using the samtools model (option -GL 1), with major and minor alleles inferred from genotype likelihoods (option -doMajorMinor 1) and allele frequencies estimated according to the major allele (option -doMaf 2). We filtered sites for a minimum read depth of 1 and maximum depth of 100, minimum mapping quality of 20, and minimum quality (q-score) of 20. From the site allele frequency spectrum, we then calculated the maximum likelihood estimate of the folded site frequency spectrum (SFS) using the ANGSD realSFS program. The folded SFS was used to calculate per-site theta statistics and genome-wide summary statistics, including genetic diversity, using the ANGSD thetaStat program (Korneliussen *et al.* 2013). We performed each of these steps on all fish from each of *Limnothrissa* and *Stolothrissa*, and then individually for each sampling site, sex, and group (for *Limnothrissa*) within each species.

# *Linkage disequilibrium among loci*

To investigate the extent to which the loci identified by DAPC are linked to one another, we used PLINK v1.9 (Purcell *et al.* 2007) to calculate pairwise linkage disequilibrium between all pairs of SNP

loci in our *Limnothrissa* and *Stolothrissa* data sets. Linkage disequilibrium was measured as the squared allelic correlation ( $R^2$ , Pritchard & Przeworski 2001). We then subsetted each of these comparisons to only the sex-linked loci identified using DAPC and compared the distribution of linkage values among the sex-linked loci to those values between all SNPs in the dataset for each of the two species. We then performed the same comparison for loci implicated in differences among the three groups in *Limnothrissa*. To determine whether sex and grouping loci are more linked than average across the genome, we performed a Mann-Whitney U test (`wilcox.test()` in R).

## Results

### *Genome assembly and variant calling*

The final assembly of the 10X Genomics Chromium-generated reference genome for *Limnothrissa miodon*, based on ~56x coverage, comprised 6730 scaffolds of length greater than 10Kb. The assembly had a scaffold N50 of 456Kb and a total assembly size of 551.1Mb. The genome contained 83.5% complete single-copy BUSCO orthologs, as well as 4.62% fragmented and 11.82% missing BUSCO genes. We retained only scaffolds > 10Kb in length for the reference genome used in downstream alignment of the RAD reads.

The Floragenex libraries yielded between 306 and 328 million reads including 21–23% bacteriophage PhiX genomic DNA, while the libraries sequenced at the Lausanne Genomic Technologies sequencing facilities yielded between 167 and 248 million reads. On average, the mapping rate for *Stolothrissa* individuals' RAD reads to the *Limnothrissa* reference genome was 80.2%, whereas it was 80.0% for *Limnothrissa* individuals. We removed six *Stolothrissa* individuals and 10 *Limnothrissa* individuals due to low quality reads, or too much missing data. After filtering, our species-specific RAD datasets contained 8,323 SNPs from 175 *Stolothrissa* samples and 12,657 SNPs from 281 *Limnothrissa* samples. The final dataset for the combined species approach contained 35,966 SNPs.

322

# 323 *Population structure*

324 Principal component analysis revealed two distinct genetic clusters in each species (Fig 2A). These  
325 clusters correspond to sexes identified through sexing of individuals by dissection (Fig 2A and Table  
326 S1). In a DAPC to identify the loci underlying the strong genetic differentiation of the sexes for  
327 *Stolothrissa*, we visually selected a loadings cut off of 0.0009 on PC1 (Fig S1), which resulted in a total  
328 of 369 (4.4%) significant SNPs distributed over 123 scaffolds with high loadings on sex difference. In  
329 *Limnothrissa*, we selected a cut off of 0.0016 on PC1 based on the distribution of loadings (Fig S2).  
330 This cut off resulted in 218 (1.7%) SNPs across 85 scaffolds with high loadings on sex differences. All  
331 of these loci show an excess of homozygosity in females and an excess of heterozygosity in males (Fig  
332 2C and 2E).

333 The sampling sites generally had similar levels of genetic diversity ( $\Theta_w$ ) for both species (Table 2,  
334 Table 3). We found no evidence for significant spatial population structure or isolation by distance  
335 within either *Stolothrissa* or *Limnothrissa* (Fig 3A). Within *Stolothrissa*, we found little evidence for  
336 additional genetic structure beyond the genetic structure linked to sex (Fig 3B). In contrast, we find  
337 very strong genetic structure within each sex in *Limnothrissa* (Fig 3C), suggesting the existence of  
338 three distinct genetic groups of *Limnothrissa* in Lake Tanganyika. However, these three groups do not  
339 correspond to geographic location where the fish were sampled.

340

# 341 *Evidence for a segregating inversion in Limnothrissa*

342 *Limnothrissa* from Lake Kivu are divergent from individuals in Lake Tanganyika, but this  
343 differentiation is weaker than that between the three groups observed within Lake Tanganyika (Fig  
344 3C). The *Limnothrissa* individuals from Lake Kivu form additional clusters that are distinct from, but  
345 parallel to, the Tanganyika clusters along the second and third PC axis (Fig 3C). Within Lake

Tanganyika, we found individuals of all three clusters at single sampling sites, and there is no clear geographic signal to these groups (Fig 3C). DAPC analysis of the two most differentiated groups within Lake Tanganyika identified 25 SNPs across 15 scaffolds with high loadings ( $> 0.006$ ; Fig 4C and S3). Among these SNPs with high loadings, we found that two clusters of *Limnothrissa* individuals were predominantly homozygous for opposite alleles, while the third group consisted of heterozygotes at these loci (Fig. 4D). This suggests that the three distinct genetic groups we observe are due to a segregating inversion, with two of the groups representing homokaryotypes and the third a heterokaryotype for these SNPs (Fig 4 and S3).

With this suggestion of a segregating inversion within *Limnothrissa*, we tested for Hardy-Weinberg equilibrium among the three groups within the lake as a whole and at each sampling site individually (Fig 5). In Lake Tanganyika, all sampling sites, regions, and the lake as a whole were in HWE ( $\chi^2$ ,  $p > 0.05$ ), while Lake Kivu frequencies differed significantly from HWE ( $\chi^2$ ,  $p = 0.005$ ) (Fig 5A and 5B). We additionally found that the proportions of all three karyotype groups differed significantly between Lake Kivu fish and the fish found in each of the north, middle (Mahale), and south basins in Lake Tanganyika ( $p = 0.012$ ,  $p = 0.0036$ ,  $p < 0.001$ ) (Fig 5B). This result seems to be driven by a much higher frequency of genotype group 3 in Lake Kivu samples than was found in Lake Tanganyika (Fig 5B). The only difference between the three basins within Lake Tanganyika was that the northern basin had a greater frequency of fish with genotype group 3 than either the Mahale or southern basins ( $p = 0.025$ ; all others  $p > 0.05$ ) (Fig 5B).

#### *Linkage disequilibrium among identified loci*

The distribution of pairwise linkage disequilibrium values among loci in the species-specific and species-combined datasets were highly right-skewed, with the majority of loci pairs having low to no linkage (mean  $R^2 = 0.009$ ) (Fig 6). In contrast, the subsets of loci identified as sex-linked in *Stolothrissa*

and *Limnothrissa* had mean pairwise LD values of 0.858 and 0.844, respectively (Fig 6), suggesting that these sets of loci are more tightly linked than expected based on the distribution of LD values for all loci (Mann-Whitney test; *Stolothrissa*  $W = 1167300000$ ,  $p < 0.001$ ; *Limnothrissa*  $W = 202550000$ ,  $p < 0.001$ ). In *Limnothrissa*, the group-delineating loci had a mean pairwise LD of 0.734, suggesting that they are also more linked than expected for random loci (Mann-Whitney test,  $W = 2386200000$ ,  $p < 0.001$ ), but less tightly linked than the sex-linked loci (Mann-Whitney test,  $W = 1862600$ ,  $p < 0.001$ ).

#### *No overlap of sex linked loci in the two sardine species*

To test if the sex-linked loci overlap between the species, we used the species-combined dataset to perform DAPC between sexes for each species individually and identified loci with high loadings. Using this approach, we identified 570 SNPs across 133 scaffolds in *Stolothrissa* (loading  $> 0.0006$ ; Fig S4) and 334 SNPs across 91 scaffolds in *Limnothrissa* linked to sex (loading  $> 0.001$ ; Fig S5). These two sets of loci were completely non-overlapping, suggesting that the sex-linked loci are unique in each species. In addition, the scaffolds on which these loci were located were non-overlapping between the species, suggesting that the discrepancy between identified loci is not simply due to different coverage of the reference genome between *Stolothrissa* and *Limnothrissa* data. When looking at *Stolothrissa* sex-linked SNPs in *Limnothrissa* individuals, only 2.5% are polymorphic, and only 0.8% of *Limnothrissa* sex-linked SNPs are polymorphic in *Stolothrissa*. In addition, the sex loci for each species do not show the same patterns of heterozygosity in the opposite species (Fig S6).

## **Discussion**

Little to no spatial genetic structuring is a relatively common observation in pelagic fish species with continuous habitats (e.g. Canales-Aguirre *et al.* 2016; Hutchinson *et al.* 2001; Momigliano *et al.*



2017). However, many studies show that pelagic fish species harbour genetic structure that does not correspond with geographic distance, but instead correlates with ecological adaptation (Berg *et al.* 2017; Kirubakaran *et al.* 2016; Roesti *et al.* 2015). We present here the largest genomic data sets analysed for the two freshwater sardines of Lake Tanganyika to date. We did not find evidence for spatial genetic structure in *Stolothrissa* or *Limnothrissa* of Lake Tanganyika (Fig 3), despite the immense size of this lake and extensive geographic sampling of populations of both species. Instead, we find evidence for the existence of many sex-linked loci in both *Stolothrissa* and *Limnothrissa*, including strong deviations from expected heterozygosity at these loci, with males being the heterogametic sex (Fig 2). In *Limnothrissa*, we additionally find three cryptic genetic groups, and patterns in heterozygosity indicate the presence of a segregating chromosomal inversion underlying this genetic structure (Fig 4). All three inversion genotypes (homokaryotypes and heterokaryotype) appear in *Limnothrissa* from both Lake Tanganyika and Lake Kivu, but relative frequencies of the karyotypes differ among these populations (Fig 5).

#### *Genetic sex differentiation in both species*

According to the canonical model of sex chromosome evolution, development of sex chromosomes initiates with the appearance of a sex-determining allele in the vicinity of loci only favourable for one of the sexes. Mechanisms reducing recombination, such as inversions, support the spread of the sex-determining allele in combination with the sexually antagonistic region due to high physical linkage. Eventually neighbouring regions also reduce recombination rate and further mutations accumulate, leading to the formation of a new sex chromosome (Bachtrog 2013; Gammerdinger & Kocher 2018; Wright *et al.* 2016). Examples range from ancient, highly heteromorphic sex chromosomes, to recent neo-sex chromosomes, which are found in mammals (Cortez *et al.* 2014), avian species (Graves 2014), and fishes (Feulner *et al.* 2018; Gammerdinger *et al.* 2018; Gammerdinger & Kocher 2018;

Kitano & Peichel 2012; Pennell *et al.* 2015; Roberts *et al.* 2009; Ross *et al.* 2009; Yoshida *et al.* 2014).

Our results suggest that sex-linked regions of the genome in both *Stolothrissa* and *Limnothrissa* are large and highly differentiated between males and females (Fig. 2). The results from our analyses of linkage disequilibrium suggest that these loci are more tightly linked in both *Limnothrissa* and *Stolothrissa* than SNP loci are on average (Fig 6). The high number of loci implicated in these genetic sex differences, and high linkage among those loci, in addition to clear patterns of excess heterozygosity in males and homozygosity in females, give strong indication of the existence of large sex-determining regions in these species, which may form distinct sex chromosomes. However, the structural arrangement of these loci remains unclear with our current reference genome. It is worth noting that the assembly of sex chromosomes remains challenging due to the haploid nature of sex chromosomes and therefore reduced sequencing depth, and existence of ampliconic and repetitive regions and a high amount of heterochromatin (Tomaszkiewicz *et al.* 2017). Such challenges with assembling sex chromosomes may lead to many scaffolds being implicated in sex determination in initial attempts at assembly, as we see in our analysis, even if these species actually have distinct sex chromosomes.

We also show that *Stolothrissa* and *Limnothrissa* SNPs linked to sex are entirely distinct, representing strong evidence for rapid evolution in these sex-linked regions (Fig S1 and S2). This means that if the common ancestor of these species had a sex-determining region, the variants on this sex-linked region have entirely turned over and become distinct in the two species, during the approximately eight million years since these species diverged (Wilson *et al.* 2008). Rapid turnover of sex chromosomes in closely related species are known from a diversity of taxa (e.g. (Jeffries *et al.* 2018; Kitano & Peichel 2012; Ross *et al.* 2009; Tennesen *et al.* 2018). The proposed mechanisms leading to such rapid turnover rates are chromosomal fusions of an autosome with an already existing sex chromosome, forming a “neo sex chromosome” (Kitano & Peichel 2012; Ross *et al.* 2009) or the translocation of sex loci from one chromosome to another (Tennesen *et al.* 2018). Understanding

the mechanisms responsible for the high turnover rate of the sex chromosomes in the Tanganyikan freshwater sardines is a fascinating area for future research.

Furthermore, it will be important for future work to investigate if the strong differentiation between the sexes might also be associated with adaptive differences between the sexes. Ecological polymorphism among sexes is known in fishes (Culumber & Tobler 2017; Laporte *et al.* 2018; Parker 1992) and can be ecologically as important as differences between species (Start & De Lisle 2018).

It is worth noting that the strong sex-linked genetic differentiation in *Limnothrissa* and *Stolothrissa* could have been mistaken for population structure had we filtered our data for excess heterozygosity without first examining it, and had we not been able to carefully phenotypically sex well-preserved, reproductively mature individuals of both species to confirm that the two groups in each species do indeed correspond to sex (Table S1, Fig 2A). Because of the strong deviations from expected heterozygosity at sex-linked loci, any filtering for heterozygosity would remove these loci from the dataset, explaining why one previous study in *Stolothrissa* using RADseq data (De Keyzer *et al.* 2019) did not clearly identify this pattern despite its prevalence in the genome. For organisms with unknown sex determination systems, and for whom sex is not readily identifiable from phenotype, there is danger in conflating biased sampling of the sexes in different populations with population structure in genomic datasets (e.g. Benestan *et al.* 2017). This underscores the importance of sexing sampled individuals whenever possible when sex determination systems are unknown, when analyzing large genomic datasets. The phenotypic and genetic sex of the sardine samples were in agreement in all individuals except one *Stolothrissa* sample (Table S1, sample 138863.IKO02). This fish was phenotypically identified as a male but genetically clustered with female individuals. We believe that this individual was not yet fully mature, and therefore was misidentified phenotypically.

*No spatial genetic structure in Limnothrissa but cryptic diversity in sympatric Limnothrissa:*

Our results reveal the existence of three distinct genetic groups of *Limnothrissa*. Intriguingly, we find all three of these groups together within the same sampling sites, and even within the same single school of juvenile fishes (Fig S7). Given patterns of heterozygosity at loci that have high loadings for distinguishing among the genetic clusters (Fig 4D) together with the strong linkage (Fig 4E), this structure is consistent with a chromosomal inversion. Chromosomal inversions, first described by Sturtevant (1921), reduce recombination in the inverted region because of the prevention of crossover in heterogametic individuals (Cooper 1945; Kirkpatrick 2010; Wellenreuther & Bernatchez 2018). Mutations in these chromosomal regions can therefore accumulate independently between the inverted and non-inverted haplotype. Although early work on chromosomal inversions in *Drosophila* has a rich history in evolutionary biology (Kirkpatrick 2010), inverted regions have recently been increasingly detected with the help of new genomic sequencing technologies in many species (e.g. Berg *et al.* 2017; Christmas *et al.* 2018; Kirubakaran *et al.* 2016; Lindtke *et al.* 2017; Zinzow-Kramer *et al.* 2015), with implications for the evolution of the populations with distinct inversion haplotypes. In *Limnothrissa*, the strong genetic divergence between the two inversion haplotypes (Fig 3C, 4A and 4B) is consistent with this pattern, and indeed the substantial independent evolution of these haplotypes is how the inversion is readily apparent even in a RADseq dataset. The divergence of the haplotypes, and the high frequency of both of these haplotypes, indicates that this inversion likely did not appear recently, although its apparent absence in *Stolothrissa* indicates it has arisen since the divergence of these sister taxa eight million years ago (95% reliability interval: 2.1–15.9 MYA; (Wilson *et al.* 2008)).

Given that both inversion haplotypes appear in relatively high numbers, it seems unlikely that drift alone could explain the rise of the inversion haplotype to its current frequencies in the *Limnothrissa* population. We expect that *Limnothrissa* have sustained large effective population sizes through much of their evolutionary history since their split with *Stolothrissa*, meaning that drift would have been a continually weak force. Although selection against inversions might occur due to an

inversion's disruption of meiosis or gene expression due to the position of the breakpoints (Kirkpatrick 2010), selection may also act on inversions when they carry alleles that themselves are under selection.

Due to the reduced recombination rates in inversions, these regions of the genome provide opportunities for local or ecological adaptation despite ongoing gene flow (Kirkpatrick & Barton 2006). It is unclear given current data whether the inversion that we describe here in *Limnothrissa* is tied to differential ecological adaptation. When we examine frequencies of the inversion karyotypes pooled across all sampled populations, the observed frequencies do not differ from Hardy-Weinberg expectations (chi-square = 3.51; p-value = 0.06). However, the Lake Kivu population does show deviation from HWE (chi-square = 7.74; p-value = 0.005) when we examine sampled populations individually. Furthermore, frequencies of the inversion karyotypes among sampled populations differ: the proportions of all three karyotypes differ significantly between Lake Kivu and Lake Tanganyika populations, and within Lake Tanganyika, one of the homokaryotypes (represented as group 3 in Fig 5), has a higher frequency in the northern basin than in the middle or southern basins (Fig 5). In Lake Tanganyika, the southern and northern basin differ substantially in nutrient abundance and limnological dynamics, and the Mahale Mountain (middle) region represents the geographical transition between the two basins (Bergamino *et al.* 2010; Kraemer *et al.* 2015; Plisnier *et al.* 1999; Plisnier *et al.* 2009). Thus, it is plausible that differential ecological selection could be driving differences in the frequencies on the inversion karyotypes spatially within the lake. Genetic drift is another possibility to explain the spatial differences in frequencies, and although this is highly plausible in explaining the frequency differences between Lake Tanganyika and Lake Kivu (see below), given the lack of spatial genetic structure in Lake Tanganyika it seems a less likely explanation within this lake. Greater understanding of the ecology of these fishes in the north and the south of Lake Tanganyika, and assessment of the genes within the inverted region, is needed to clarify this question.

## Comparing *Limnothrissa* populations in Lake Tanganyika to that introduced to Lake Kivu

We found substantial divergence between *Limnothrissa* in their native Lake Tanganyika and the introduced population in Lake Kivu. This could derive from founder effects, from drift within this population since their introduction in the absence of gene flow with the Lake Tanganyika population, or from adaptive evolution in the Lake Kivu population since their introduction to this substantially different lake environment. Future studies should examine these possibilities with a larger sample of individuals from Lake Kivu. We identified individuals in Lake Kivu with all three inversion genotypes that were detected in Lake Tanganyikan fish, suggesting that the inversion is also segregating in Lake Kivu, and that the founding individuals likely harboured this genetic variation. That said, the frequency of the karyotypes in Lake Kivu strongly deviates from Hardy-Weinberg expectations ( $\chi^2 = 7.74$ ;  $p$ -value = 0.005). This suggests that the inversion locus may be under directional selection. This finding is in contrast with frequent expectations for the behaviour of inversions: typically, one would predict some sort of balancing selection (e.g. negative frequency dependent selection) to maintain inversion haplotype diversity (Wellenreuther & Bernatchez 2018). Another possibility is that the inversion locus is linked to non-random mating in the Kivu population. In addition, the strong difference in the frequencies of the inversion haplotypes compared to Lake Tanganyika populations has also likely been influenced by founder effects. *Limnothrissa* were introduced to Lake Kivu in the 1950s (Hauser *et al.* (1995), and all introduced fish were brought from the northern part of Lake Tanganyika. The homokaryotype, represented as group 3, is the prevalent karyotype in Lake Kivu, and this karyotype also appears in highest frequencies in our samples from northern Lake Tanganyika sites (Fig 5). Thus, it is plausible that founder effects could have led to the increased frequency of this karyotype within the Lake Kivu population. This origin, however, does not explain current deviations from HWE given that the population was introduced decades ago.

## Conclusions

Genomic data from *Stolothrissa* and *Limnothrissa* reveal an interesting array of unexpected patterns in chromosomal evolution. Modern fisheries management seeks to define locally adapted, demographically independent units. We do not find significant spatial genetic structure within these two freshwater sardine species from Lake Tanganyika. The genetic structure we find is all in sympatry, namely as strong genetic divergence between the sexes, and evidence of a segregating inversion in *Limnothrissa*. Further research should focus on the potential for adaptive differences between the sexes and between the inversion genotypes in *Limnothrissa*. Such work will contribute to better understanding the role that these key components of the pelagic community assume in the ecosystem of this lake, which provides important resources to millions of people living at its shores.

## Acknowledgements

This work was funded by the Swiss National Science Foundation (grant CR23I2-166589), a grant from The Nature Conservancy to CEW and PBM, and start-up funding from the University of Wyoming to CEW. CEW was partially supported by NSF grant DEB-1556963. Computing was accomplished with an allocation from the University of Wyoming's Advanced Research Computing Center, on its Teton Intel x86\_64 cluster (<https://doi.org/10.15786/M2FY47>) and the Genetic Diversity Center (GDC) of ETH Zürich. Special thanks go to Mupape Mukuli, for facilitating logistics during fieldwork and to the crew of the MV Maman Benita. We thank the whole team at the Tanzanian Fisheries Research Institute for their support. A special thank goes to Mary Kishe for her support during fieldwork permission processes and to the Tanzanian Commission for Science and Technology (COSTECH) for their support of this project through permits allowing us to do research in Tanzania. Thanks to Mark Kirkpatrick and his lab group for enlightening discussion regarding the interpretation of these data, and to the Wagner lab at the University of Wyoming, and the FishEc group at EAWAG, especially Kotaro Kagawa and Oliver Selz, for helpful discussion.

## References

- Andrews S (2010) FASTQC. A quality control tool for high throughput sequence data.
- Bachtrog D (2013) Y-chromosome evolution: emerging insights into processes of Y-chromosome degeneration. *Nat Rev Genet* **14**, 113-124.
- Baird NA, Etter PD, Atwood TS, *et al.* (2008) Rapid SNP discovery and genetic mapping using sequenced RAD markers. *PLoS One* **3**.
- Belgrano A, Fowler CW (2011) *Ecosystem-based management for Marine Fisheries: An evolving perspective*.
- Benestan L, Moore JS, Sutherland BJG, *et al.* (2017) Sex matters in massive parallel sequencing: Evidence for biases in genetic parameter estimation and investigation of sex determination systems. *Mol Ecol* **26**, 6767-6783.
- Berg PR, Star B, Pampoulie C, *et al.* (2017) Trans-oceanic genomic divergence of Atlantic cod ecotypes is associated with large inversions. *Heredity (Edinb)* **119**, 418-428.

- Bergamino N, Horion S, Stenuite S, *et al.* (2010) Spatio-temporal dynamics of phytoplankton and primary production in Lake Tanganyika using a MODIS based bio-optical time series. *Remote Sensing of Environment* **114**, 772-780.
- Botsford LW, Castilla JC, Peterson CH (1997) The Management of Fisheries and Marine Ecosystems. *Science* **277**, 509-515.
- Canales-Aguirre CB, Ferrada-Fuentes S, Galleguillos R, Hernandez CE (2016) Genetic Structure in a Small Pelagic Fish Coincides with a Marine Protected Area: Seascape Genetics in Patagonian Fjords. *PLoS One* **11**, e0160670.
- Catchen J, Hohenlohe PA, Bassham S, Amores A, Cresko WA (2013) Stacks: an analysis tool set for population genomics. *Mol Ecol* **22**, 3124-3140.
- Christmas MJ, Wallberg A, Bunikis I, *et al.* (2018) Chromosomal inversions associated with environmental adaptation in honeybees. *Mol Ecol*.
- Cohen AS, Gergurich EL, Kraemer BM, *et al.* (2016) Climate warming reduces fish production and benthic habitat in Lake Tanganyika, one of the most biodiverse freshwater ecosystems. *Proc Natl Acad Sci U S A* **113**, 9563-9568.
- Cohen AS, Soreghan MJ, Scholz CA (1993) Estimating the age of formation of lakes: an example from Lake Tanganyika, East African Rift system. *Geology* **21**, 511-514.
- Collart A (1960) L'introduction du *Stolothrissa tanganicae* (Ndagala) au Lac Kivu. *Bulletin Agricole du Congo Belge*, 975-985.
- Collart A (1989) Introduction et acclimatation de l'isambaza au Lac Kivu. Seminaire "Trente ans apres l'introduction l'isambaza au Lac Kivu ". In: *FAO Report*, Gisenyi.
- Connallon T, Olito C, Dutoit L, *et al.* (2018) Local adaptation and the evolution of inversions on sex chromosomes and autosomes. *Philos Trans R Soc Lond B Biol Sci* **373**.
- Cooper KW (1945) NORMAL SEGREGATION WITHOUT CHIASMATA IN FEMALE DROSOPHILA MELANOGASTER *Genetics* **30**, 472-484.
- Cortez D, Marin R, Toledo-Flores D, *et al.* (2014) Origins and functional evolution of Y chromosomes across mammals. *Nature* **508**, 488.
- Coulter GW (1976) The biology of Lates species (Nile perch) in Lake Tanganyika, and the status of the pelagic fishery for Lates species and *Luciolates stappersii* (Blgr.). *Journal of Fish Biology* **9**, 235-259.
- Coulter GW (1991) *Lake Tanganyika and its Life* British Museum (Natural History) Cromwell Road, London SW7 5BD & Oxford University Press, Walton Street, Oxford OX2 6DP.
- Culumber ZW, Tobler M (2017) Sex-specific evolution during the diversification of live-bearing fishes. *Nature Ecology & Evolution* **1**, 1185-1191.
- Danecek P, Auton A, Abecasis G, *et al.* (2011) The variant call format and VCFtools. *Bioinformatics* **27**, 2156-2158.
- De Keyzer ELR, De Corte Z, Van Steenberge M, *et al.* (2019) First genomic study on Lake Tanganyika sprat *Stolothrissa tanganicae*: a lack of population structure calls for integrated management of this important fisheries target species. *BMC Evol Biol* **19**, 6.
- FAO (1995) Management of African inland fisheries for sustainable production. In: *First Pan African Fisheries Congress and Exhibition*. FAO Rome, UNEP, NAIROBI.
- Feulner PGD, Schwarzer J, Haesler MP, Meier JI, Seehausen O (2018) A Dense Linkage Map of Lake Victoria Cichlids Improved the Pundamilia Genome Assembly and Revealed a Major QTL for Sex-Determination. *G3 (Bethesda)* **8**, 2411-2420.
- Gammerdinger WJ, Conte MA, Sandkam BA, *et al.* (2018) Novel Sex Chromosomes in 3 Cichlid Fishes from Lake Tanganyika. *J Hered* **109**, 489-500.
- Gammerdinger WJ, Kocher TD (2018) Unusual Diversity of Sex Chromosomes in African Cichlid Fishes. *Genes (Basel)* **9**.



- Graves JAM (2014) Avian sex, sex chromosomes, and dosage compensation in the age of genomics. *Chromosome Research* **22**, 45-57.
- Hauser L, Carvalho GR, Pitcher TJ (1995) Morphological and genetic differentiation of the African clupeid *Limnothrissa miodon* 34 years after introduction to Lake Kivu. *Journal of Fish Biology* **47**, 127-144.
- Hauser L, Carvalho GR, Pitcher TJ (1998) Genetic population structure in the Lake Tanganyika sardine *Limnothrissa miodon*. *Journal of Fish Biology* **53**, 413-429.
- Hooper DM, Griffith SC, Price TD (2019) Sex chromosome inversions enforce reproductive isolation across an avian hybrid zone. *Mol Ecol* **28**, 1246-1262.
- Hutchinson WF (2008) The dangers of ignoring stock complexity in fishery management: the case of the North Sea cod. *Biol Lett* **4**, 693-695.
- Hutchinson WF, Carvalho GR, Rogers SI (2001) Marked genetic structuring in localised spawning populations of cod *Gadus morhua* in the North Sea and adjoining waters, as revealed by microsatellites. *Marine Ecology Progress Series* **223**, 251-269.
- Jeffries DL, Lavanchy G, Sermier R, et al. (2018) A rapid rate of sex-chromosome turnover and non-random transitions in true frogs. *Nat Commun* **9**, 4088.
- Jombart T (2008) adegenet: a R package for the multivariate analysis of genetic markers. *Bioinformatics* **24**, 1403-1405.
- Jombart T, Devillard S, Balloux F (2010) Discriminant analysis of principal components: a new method for the analysis of genetically structured populations. *BMC Genetics* **11**, 94.
- Jones FC, Grabherr MG, Chan YF, et al. (2012) The genomic basis of adaptive evolution in threespine sticklebacks. *Nature* **484**, 55-61.
- Kimirei IA, Mgaya YD, Chande AI (2008) Changes in species composition and abundance of commercially important pelagic fish species in Kigoma area, Lake Tanganyika, Tanzania. *Aquatic Ecosystem Health and Management* **11**, 29-35.
- Kirkpatrick M (2010) How and Why Chromosome Inversions Evolve. *PLoS Biology* **8**, e1000501.
- Kirkpatrick M, Barton N (2006) Chromosome inversions, local adaptation and speciation. *Genetics* **173**, 419-434.
- Kirubakaran TG, Grove H, Kent MP, et al. (2016) Two adjacent inversions maintain genomic differentiation between migratory and stationary ecotypes of Atlantic cod. *Mol Ecol* **25**, 2130-2143.
- Kitano J, Peichel CL (2012) Turnover of sex chromosomes and speciation in fishes. *Environ Biol Fishes* **94**, 549-558.
- Korneliussen TS, Albrechtsen A, Nielsen R (2014) ANGSD: Analysis of Next Generation Sequencing Data. *BMC Bioinformatics* **15**, 356.
- Korneliussen TS, Moltke I, Albrechtsen A, Nielsen R (2013) Calculation of Tajima's D and other neutrality test statistics from low depth next-generation sequencing data. *BMC Bioinformatics* **14**, 289.
- Kraemer BM, Hook S, Huttula T, et al. (2015) Century-Long Warming Trends in the Upper Water Column of Lake Tanganyika. *PLoS One* **10**, e0132490.
- Kurki H, Mannini P, Vuorinen I, et al. (1999) Macrozooplankton communities in Lake Tanganyika indicate food chain differences between the northern part and the main basins. *Hydrobiologia* **407**, 123-129.
- Kuusipalo L (1999) Genetic variation in the populations of pelagic clupeids *Stolothrissa tanganicae* and *Limnothrissa miodon* and Nile perch (*Lates niloticus*, *L. mariae*) in Lake Tanganyika. FAO/FINNIDA Research for the Management of the Fisheries of Lake Tanganyika., p. 28p.
- Lamichhaney S, Fuentes-Pardo AP, Rafati N, et al. (2017) Parallel adaptive evolution of geographically distant herring populations on both sides of the North Atlantic Ocean. *Proceedings of the National Academy of Sciences* **114**, E3452-E3461.

Langmead B, Salzberg SL (2012) Fast gapped-read alignment with Bowtie 2. *Nat Methods* **9**, 357-359.

Laporte M, Berrebi P, Claude J, *et al.* (2018) The ecology of sexual dimorphism in size and shape of the freshwater blenny *Salaria fluviatilis*. *Curr Zool* **64**, 183-191.

Li H, Durbin R (2009) Fast and accurate short read alignment with Burrows–Wheeler transform. *Bioinformatics* **25**, 1754-1760.

Li H, Handsaker B, Wysoker A, *et al.* (2009a) The Sequence Alignment/Map format and SAMtools. *Bioinformatics* **25**, 2078-2079.

Li H, Handsaker B, Wysoker A, *et al.* (2009b) The Sequence Alignment/Map format and SAMtools. *Bioinformatics* **25**, 2078-2079.

Lindtke D, Lucek K, Soria-Carrasco V, *et al.* (2017) Long-term balancing selection on chromosomal variants associated with crypsis in a stick insect. *Mol Ecol* **26**, 6189-6205.

Loiselle S, C  zar A, Adgo E, *et al.* (2014) Decadal Trends and Common Dynamics of the Bio-Optical and Thermal Characteristics of the African Great Lakes. *PLoS One* **9**, e93656.

Marques DA, Lucek K, Meier JJ, *et al.* (2016) Genomics of Rapid Incipient Speciation in Sympatric Threespine Stickleback. *PLoS Genet* **12**, e1005887.

Martinez Barrio A, Lamichhaney S, Fan G, *et al.* (2016) The genetic basis for ecological adaptation of the Atlantic herring revealed by genome sequencing. *Elife* **5**.

McGlue MM, Lezzar KE, Cohen AS, *et al.* (2007) Seismic records of late Pleistocene aridity in Lake Tanganyika, tropical East Africa. *Journal of Paleolimnology* **40**, 635-653.

Mikheenko A, Pribelski A, Saveliev V, Antipov D, Gurevich A (2018) Versatile genome assembly evaluation with QUAST-LG. *Bioinformatics* **34**, i142-i150.

M  ls   H, Reynolds JE, Coenen EJ, Lindqvist OV (1999) Fisheries research towards resource management on Lake Tanganyika. *Hydrobiologia* **407**, 1-24.

M  ls   H, Sarvala J, Badende S, *et al.* (2002) Ecosystem monitoring in the development of sustainable fisheries in Lake Tanganyika. *Aquatic Ecosystem Health and Management* **5**, 267-281.

Momigliano P, Jokinen H, Fraimout A, *et al.* (2017) Extraordinarily rapid speciation in a marine fish. *Proceedings of the National Academy of Sciences* **114**, 6074-6079.

Natri HM, Merila J, Shikano T (2019) The evolution of sex determination associated with a chromosomal inversion. *Nat Commun* **10**, 145.

O'Reilly CM, Alin SR, Plisnier PD, Cohen AS, McKee BA (2003) Climate change decreases aquatic ecosystem productivity of Lake Tanganyika, Africa. *Nature* **424**, 766-768.

Parker GA (1992) The evolution of sexual size dimorphism in fish. *Journal of Fish Biology*, 1-20.

Pennell MW, Kirkpatrick M, Otto SP, *et al.* (2015) Y Fuse? Sex Chromosome Fusions in Fishes and Reptiles. *PLOS Genetics* **11**, e1005237.

Plisnier PD, Chitamwebwa D, Mwape L, *et al.* (1999) Limnological annual cycle inferred from physical-chemical fluctuations at three stations of Lake Tanganyika. *Hydrobiologia* **407**, 45-58.

Plisnier PD, Mgana H, Kimirei I, *et al.* (2009) Limnological variability and pelagic fish abundance (*Stolothrissa tanganicae* and *Lates stappersii*) in Lake Tanganyika. *Hydrobiologia* **625**, 117-134.

Presgraves DC (2008) Sex chromosomes and speciation in *Drosophila*. *Trends in Genetics* **24**, 336-343.

Pritchard JK, Przeworski M (2001) Linkage Disequilibrium in Humans: Models and Data. *The American Journal of Human Genetics* **69**, 1-14.

Purcell S, Neale B, Todd-Brown K, *et al.* (2007) PLINK: A Tool Set for Whole-Genome Association and Population-Based Linkage Analyses. *The American Journal of Human Genetics* **81**, 559-575.

Qvarnstrom A, Bailey RI (2009) Speciation through evolution of sex-linked genes. *Heredity (Edinb)* **102**, 4-15.

Roberts RB, Ser JR, Kocher TD (2009) Sexual Conflict Resolved by Invasion of a Novel Sex Determiner in Lake Malawi Cichlid Fishes. *Science* **326**, 998-1001.

- Roesti M, Kueng B, Moser D, Berner D (2015) The genomics of ecological vicariance in threespine stickleback fish. *Nat Commun* **6**, 8767.
- Ross JA, Urton JR, Boland J, Shapiro MD, Peichel CL (2009) Turnover of Sex Chromosomes in the Stickleback Fishes (Gasterosteidae). *PLOS Genetics* **5**, e1000391.
- Sarvala J, Tarvainen M, Salonen K, Mölsä H (2002) Pelagic food web as the basis of fisheries in Lake Tanganyika: A bioenergetic modeling analysis. *Aquatic Ecosystem Health and Management* **5**, 283-292.
- Start D, De Lisle S (2018) Sexual dimorphism in a top predator (*Notophthalmus viridescens*) drives aquatic prey community assembly. *Proc Biol Sci* **285**.
- Sturtevant AH (1921) A Case of Rearrangement of Genes in Drosophila. *Genetics* **7**, 235-237.
- Tennessen JA, Wei N, Straub SCK, et al. (2018) Repeated translocation of a gene cassette drives sex-chromosome turnover in strawberries. *PLoS Biol* **16**, e2006062.
- Tomaszkiewicz M, Medvedev P, Makova KD (2017) Y and W Chromosome Assemblies: Approaches and Discoveries. *Trends Genet* **33**, 266-282.
- van der Knaap M (2013) Comparative analysis of fisheries restoration and public participation in Lake Victoria and Lake Tanganyika. *Aquatic Ecosystem Health and Management* **16**, 279-287.
- Van der Knaap M, Katonda KI, De Graaf GJ (2014) Lake Tanganyika fisheries frame survey analysis: Assessment of the options for management of the fisheries of Lake Tanganyika. *Aquatic Ecosystem Health and Management* **17**, 4-13.
- van Zwieten PAM, Roest FC, Machiels MAM, Van Densen WLT (2002) Effects of inter-annual variability, seasonality and persistence on the perception of long-term trends in catch rates of the industrial pelagic purse-seine fishery of northern Lake Tanganyika (Burundi). *Fisheries Research* **54**, 329-348.
- Verburg P, Hecky RE (2003) Wind patterns, evaporation, and related physical variables in Lake Tanganyika, east Africa. *Journal of Great Lakes Research* **29**, 48-61.
- Verburg P, Hecky RE, Kling H (2003) Ecological consequences of a century of warming in Lake Tanganyika. *Science* **301**, 505-507.
- Wellenreuther M, Bernatchez L (2018) Eco-Evolutionary Genomics of Chromosomal Inversions. *Trends Ecol Evol* **33**, 427-440.
- Williams JGK, Kubelik AR, Livak KJ, Rafalski JA, Tingey SV (1990) DNA polymorphisms amplified by arbitrary primers are useful as genetic markers. *Nucleic Acids Research* **18**, 6531- 6535.
- Wilson AB, Teugels GG, Meyer A (2008) Marine incursion: the freshwater herring of Lake Tanganyika are the product of a marine invasion into west Africa. *PLoS One* **3**, e1979.
- Wright AE, Dean R, Zimmer F, Mank JE (2016) How to make a sex chromosome. *Nature Communications* **7**, 12087.
- Yoshida K, Makino T, Yamaguchi K, et al. (2014) Sex Chromosome Turnover Contributes to Genomic Divergence between Incipient Stickleback Species. *PLOS Genetics* **10**, e1004223.
- Zheng X, Levine D, Shen J, et al. (2012) A high-performance computing toolset for relatedness and principal component analysis of SNP data. *Bioinformatics* **28**, 3326-3328.
- Zinzow-Kramer WM, Horton BM, McKee CD, et al. (2015) Genes located in a chromosomal inversion are correlated with territorial song in white-throated sparrows. *Genes Brain Behav* **14**, 641-654.

# **Data Accessibility Statement**

We are happy, to make our genetic data, including our reference genome, publically available by submitting it to the European Nucleotide Archive (ENA). We intend to submit as soon as possible but by the latest after acceptance of the manuscript.

770

771 Data Accessibility

772 - RAD sequences: will be uploaded to ENA as soon as possible but by the latest after acceptance

773 - Final DNA sequence assembly will be uploaded to ENA as soon as possible but by the latest after  
774 acceptance

775

776

777 Author contributions:

778 JJ: developing and writing SNSF grant, sampling and processing fish, identifying phenotypic sex of  
779 fish, DNA extractions, preparing RAD libraries, data analysis, writing on the manuscript

780 JR: sampling and processing fish, DNA extractions, whole genome assembly, data analysis, writing on  
781 the manuscript

782 PBM: developing grant for The Nature Conservancy, contributing samples, discussing results,  
783 reviewing manuscript

784 IK: developing and writing SNSF grant, facilitating permission processes, providing logistics for  
785 fieldwork, reviewing manuscript

786 EAS: sampling and processing fish, facilitating permission processes, providing logistics for fieldwork,  
787 enable collaboration with Tanzanian fishermen, discussing manuscript, reviewing manuscript

788 JBM: sampling and processing fish, facilitating permission processes, providing logistics for fieldwork,  
789 enable collaboration with Tanzanian fishermen, discussing and reviewing manuscript

790 BW: developing and writing SNSF grant, reviewing and discussing manuscript

791 CD: developing SNSF grant, sampling and processing fish, facilitating logistics during fieldwork,  
792 reviewing manuscript

793 SM: developing SNSF grant, facilitating permission process, RAD library preparation for sequencing,  
794 reviewing manuscript

795 OS: developing and writing SNSF grant, identifying phenotypic sex of fish, facilitating permission  
796 process, reviewing and discussing manuscript

797 CEW: developing and writing SNSF and TNC grants, sampling and processing fish, contributing  
798 samples, whole genome assembly, data analysis, discussing results, writing manuscript, revise  
799 manuscript

800

801

802

803

804

805

806

807

808

809

810

811

Table 1. Fish collected from Democratic Republic of Congo (DRC), Tanzania (TNZ), Zambia (ZM) and Rwanda (RW).

**Number of sequenced individuals**

| <b>Stolothrissa</b> | <b>Limnothrissa</b> | <b>Site</b>      | <b>Country</b> |
|---------------------|---------------------|------------------|----------------|
| 0                   | 21                  | Lake Kivu        | RW             |
| 7                   | 0                   | Kilomoni         | DRC            |
| 15                  | 0                   | Lusenda          | DRC            |
| 5                   | 2                   | Kabimba          | DRC            |
| 15                  | 17                  | Kagunga          | TNZ            |
| 61                  | 49                  | Kigoma           | TNZ            |
| 25                  | 37                  | North Mahale     | TNZ            |
| 6                   | 38                  | South Mahale     | TNZ            |
| 18                  | 11                  | Ikola            | TNZ            |
| 12                  | 61                  | Kipili           | TNZ            |
| 0                   | 41                  | Kasanga          | TNZ            |
| 17                  | 1                   | Mbete            | ZM             |
| 0                   | 13                  | Crocodile Island | ZM             |
| 181 Samples         | 291 Samples         | 13 Sites         | 4 Countries    |

Table 2. Genetic diversity within (Watterson's theta,  $\Theta_w$ , along diagonal) and differentiation between (weighted  $F_{ST}$ , above diagonal) sampling sites (unshaded) and basins (shaded) for *Limnothrissa* populations included in this study.

|                  | Kivu   | <i>NORTH</i> | Kagunga | Kigoma  | Kabimba | <i>MIDDLE</i> | North Mahale | South Mahale | Ikola  | <i>SOUTH</i> | Kipili | Kasanga | Mbete  | Crocodile Island |
|------------------|--------|--------------|---------|---------|---------|---------------|--------------|--------------|--------|--------------|--------|---------|--------|------------------|
| Kivu             | 0.0010 |              |         |         |         |               |              |              |        |              |        |         |        |                  |
| <i>NORTH</i>     |        | 0.0040       |         |         |         | 0.173         |              |              |        | 0.117        |        |         |        |                  |
| Kagunga          |        | 0.0017       | 0.0032  | 0.00022 |         | 0.0042        | 0.0055       | 0.0010       |        | 0.0039       | 0.0007 | 0.0019  | 0.0024 |                  |
| Kigoma           |        |              | 0.0014  | 0       |         | 0.0021        | 0.0017       | 0.0026       |        | 0.0043       | 0.0023 | 0.0052  | 0.0056 |                  |
| Kabimba          |        |              |         | 0.0011  |         | 0             | 0.0034       | 0.0004       |        | 0.0077       | 0      | 0       | 0.0019 |                  |
| <i>MIDDLE</i>    |        |              |         |         |         | 0.0043        |              |              |        | 0.211        |        |         |        |                  |
| North Mahale     |        |              |         |         |         |               | 0.0007       | 0.0005       | 0.0037 |              | 0.0063 | 0.0033  | 0.0038 | 0.0053           |
| South Mahale     |        |              |         |         |         |               |              | 0.0008       | 0.0043 |              | 0.0049 | 0.0039  | 0.0069 | 0.0142           |
| Ikola            |        |              |         |         |         |               |              |              | 0.0014 |              | 0.0028 | 0.0028  | 0.0047 | 0.0106           |
| <i>SOUTH</i>     |        |              |         |         |         |               |              |              |        | 0.0023       |        |         |        |                  |
| Kipili           |        |              |         |         |         |               |              |              |        |              | 0.0032 | 0.0013  | 0.0079 | 0.0199           |
| Kasanga          |        |              |         |         |         |               |              |              |        |              | 0.0018 | 0.0042  | 0.0015 |                  |
| Mbete            |        |              |         |         |         |               |              |              |        |              |        | 0.0015  | 0      |                  |
| Crocodile Island |        |              |         |         |         |               |              |              |        |              |        |         | 0.0013 |                  |

Table 3. Genetic diversity within (Watterson's theta,  $\Theta_w$ , along diagonal) and differentiation between (weighted  $F_{ST}$ , above diagonal) sampling sites (unshaded) and basins (shaded) for *Stolothrissa* populations included in this study.

|              | NORTH         | Kilomoni      | Lusenda       | Kagunga       | Kigoma        | Kabimba       | MIDDLE        | North Mahale  | South Mahale  | Ikola        | SOUTH         | Kipili        | Mbete         |
|--------------|---------------|---------------|---------------|---------------|---------------|---------------|---------------|---------------|---------------|--------------|---------------|---------------|---------------|
| NORTH        | <b>0.0044</b> |               |               |               |               |               | <b>0.243</b>  |               |               |              | <b>0.315</b>  |               |               |
| Kilomoni     |               | <b>0.0012</b> | 0.0038        | 0.0033        | 0.00001       | 0.0098        |               | 0.0002        | 0             | 0.0017       |               | 0.0002        | 0.0011        |
| Lusenda      |               |               | <b>0.0007</b> | 0.0086        | 0.0105        | 0.0268        |               | 0.0088        | 0.0144        | 0.0115       |               | 0.0080        | 0.0008        |
| Kagunga      |               |               |               | <b>0.0007</b> | 0.0033        | 0.0154        |               | 0.0045        | 0.0031        | 0.0014       |               | 0.0000        | 0.0056        |
| Kigoma       |               |               |               |               | <b>0.0007</b> | 0.0107        |               | 0.0007        | 0             | 0.0040       |               | 0.0051        | 0.0075        |
| Kabimba      |               |               |               |               |               | <b>0.0008</b> |               | 0.0140        | 0.0013        | 0.0142       |               | 0.0158        | 0.0218        |
| MIDDLE       |               |               |               |               |               |               | <b>0.0014</b> |               |               |              | <b>0.358</b>  |               |               |
| North Mahale |               |               |               |               |               |               |               | <b>0.0014</b> | 0             | 0.0055       |               | 0.0061        | 0.0061        |
| South Mahale |               |               |               |               |               |               |               |               | <b>0.0014</b> | 0.0045       |               | 0.0064        | 0.0116        |
| Ikola        |               |               |               |               |               |               |               |               |               | <b>0.001</b> |               | 0.0010        | 0.0089        |
| SOUTH        |               |               |               |               |               |               |               |               |               |              | <b>0.0007</b> |               |               |
| Kipili       |               |               |               |               |               |               |               |               |               |              |               | <b>0.0011</b> | 0.0048        |
| Mbete        |               |               |               |               |               |               |               |               |               |              |               |               | <b>0.0011</b> |



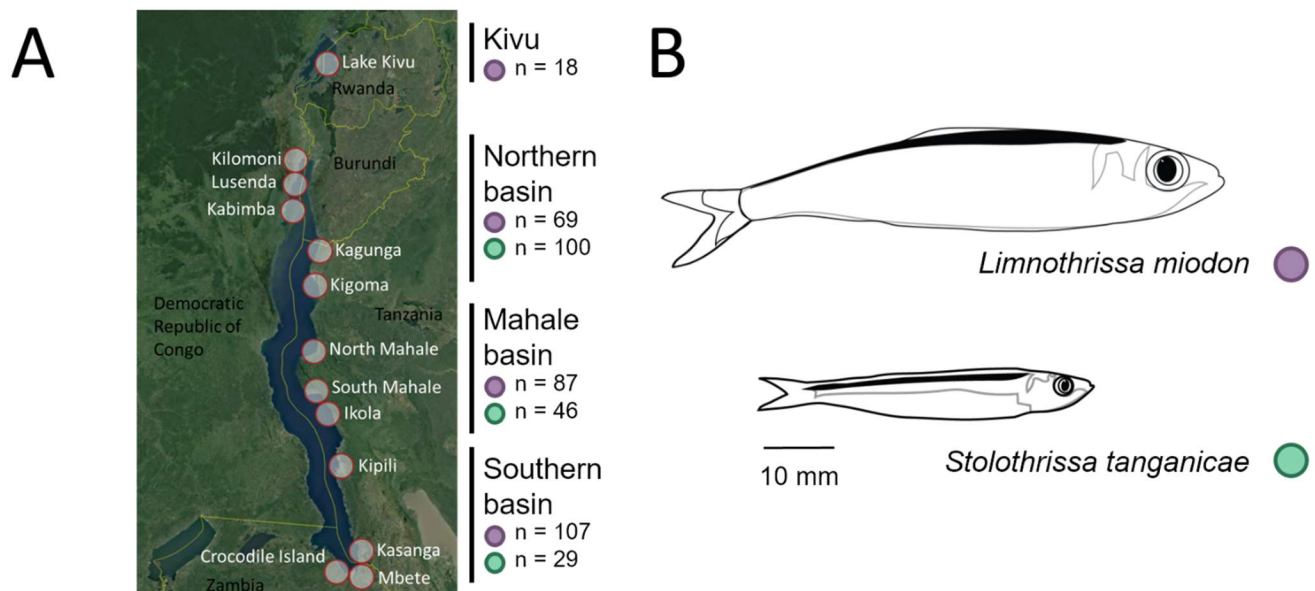

**Figure 1.** (A) Map of Lake Tanganyika, with sampling sites labeled and sample sizes from the three basins within Lake Tanganyika and Lake Kivu indicated for each species. (B) Drawings of *Limnothrissa miodon* and *Stolothrissa tanganicae*, with scale indicated for average mature sizes of the two species. Drawings courtesy of Jimena Golcher-Benavides.

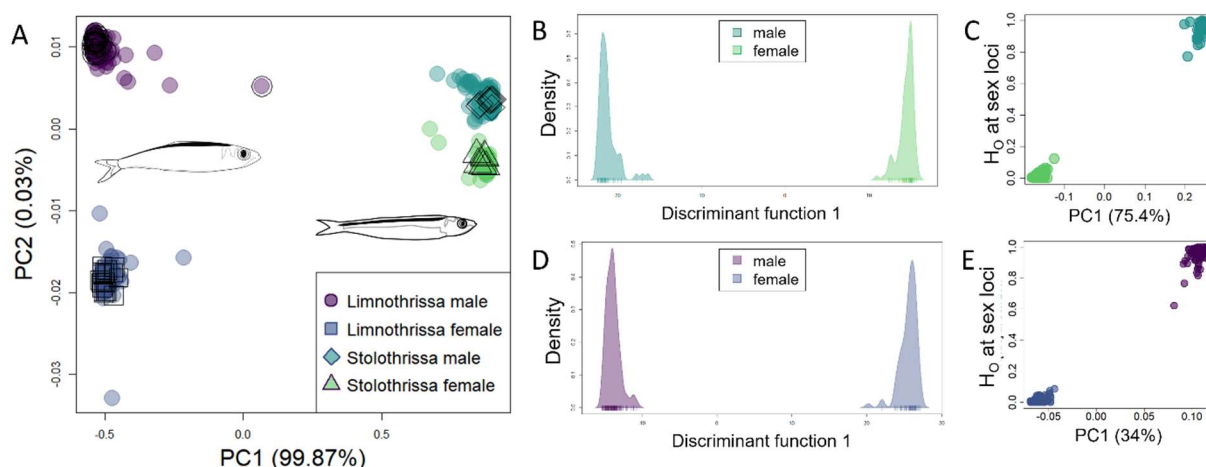

**Figure 2.** (A) Principal component analysis of all *Stolothrissa* and *Limnothrissa* individuals combined, colored by species identity and sex. Empty shapes denote individuals that were dissected and for whom sex was determined phenotypically. These dissection phenotypes group into genetic clusters, and therefore were used to identify the sex of each of the genetic clusters. In the combined PCA, the first axis generally corresponds to species, while the second axis corresponds to sex. Discriminant analysis of principal components (DAPC) results for (B) *Stolothrissa* and (D) *Limnothrissa* demonstrate distinct separation among males and females, with intraspecific differentiation ( $F_{ST}$ ) between the two groups indicated. DAPC was used to identify loci associated with this differentiation (see Supplementary Figure S1 and S2); observed heterozygosity ( $H_{obs}$ ) of each individual at those loci with high loadings is plotted against the first intraspecific PCA axis indicated in (C) for *Stolothrissa* and (E) for *Limnothrissa*, demonstrating both that sex dictates the first axis of differentiation in both species, and that males are the heterogametic sex at these loci in both species. There were 369 significant SNPs differentiating the sexes in *Stolothrissa* and 218 significant SNPs in *Limnothrissa*, with no overlap between the two species.

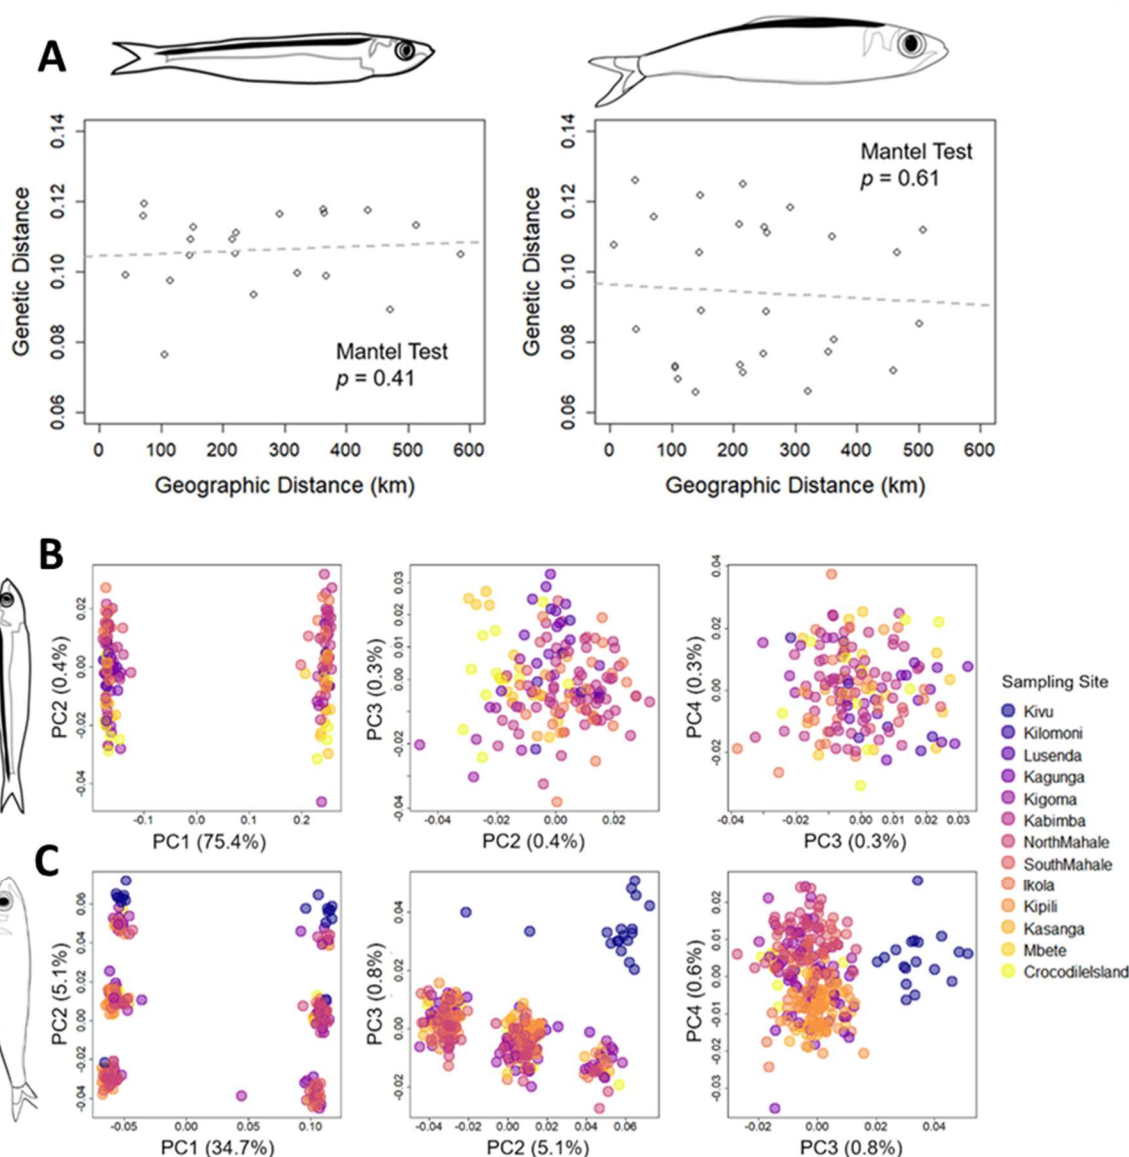

**Figure 3.** (A) shows the relationship between genetic and geographic distance. Neither species has evidence for statistically significant spatial population genetic structure using mantel test. (B) and (C) show Species-specific principal components analysis of *Stolothrissa* and *Limnothrissa* individuals, colored by sampling sites. In both species, PC1 differentiates the sexes; in *Limnothrissa*, PC2 separates each sex into three distinct groups, while PC3 separates individuals from Lake Kivu from those in Lake Tanganyika. Sampling sites are ordered from north (Kivu) to south (Crocodile Island).

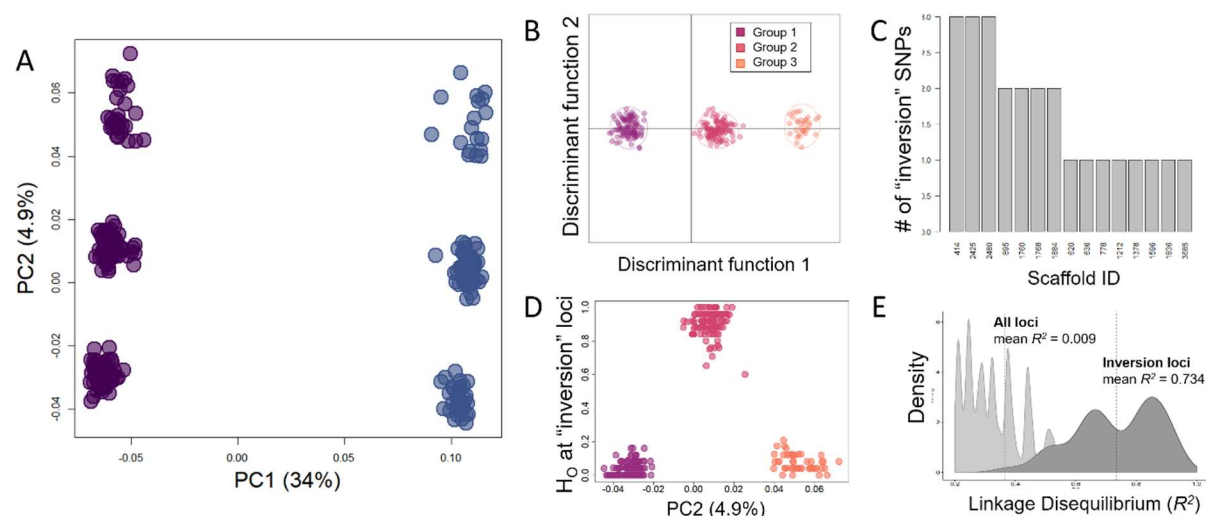

**Figure 4.** Evidence in *Limnothrissa* points to the existence of a segregating inversion. (A) Principal component analysis for all *Limnothrissa* individuals of Lake Tanganyika, demonstrating separation among sexes along the first principal component axis (PC1), and separation into three groups for both males (purple) and females (blue) on the second axis (PC2). For our discriminant analysis of principal components (B), we identified individuals according to these groups, and identified SNPs with high loadings along this axis. (C) Scaffold locations of SNPs with high loadings along this 'group' axis, showing that the 25 significant SNPs were found on 15 different scaffolds. At these significant loci, two groups were predominantly homozygous (D), while the third (intermediate) group was generally heterozygous. Despite the fact that these SNPs were spread out across several scaffolds, the distribution of pairwise linkage disequilibrium values (E) between just the inversion loci (dark) has a mean  $R^2 = 0.734$ , whereas the distribution for all loci in the data set for *Limnothrissa* (light) has a mean  $R^2 = 0.009$ .

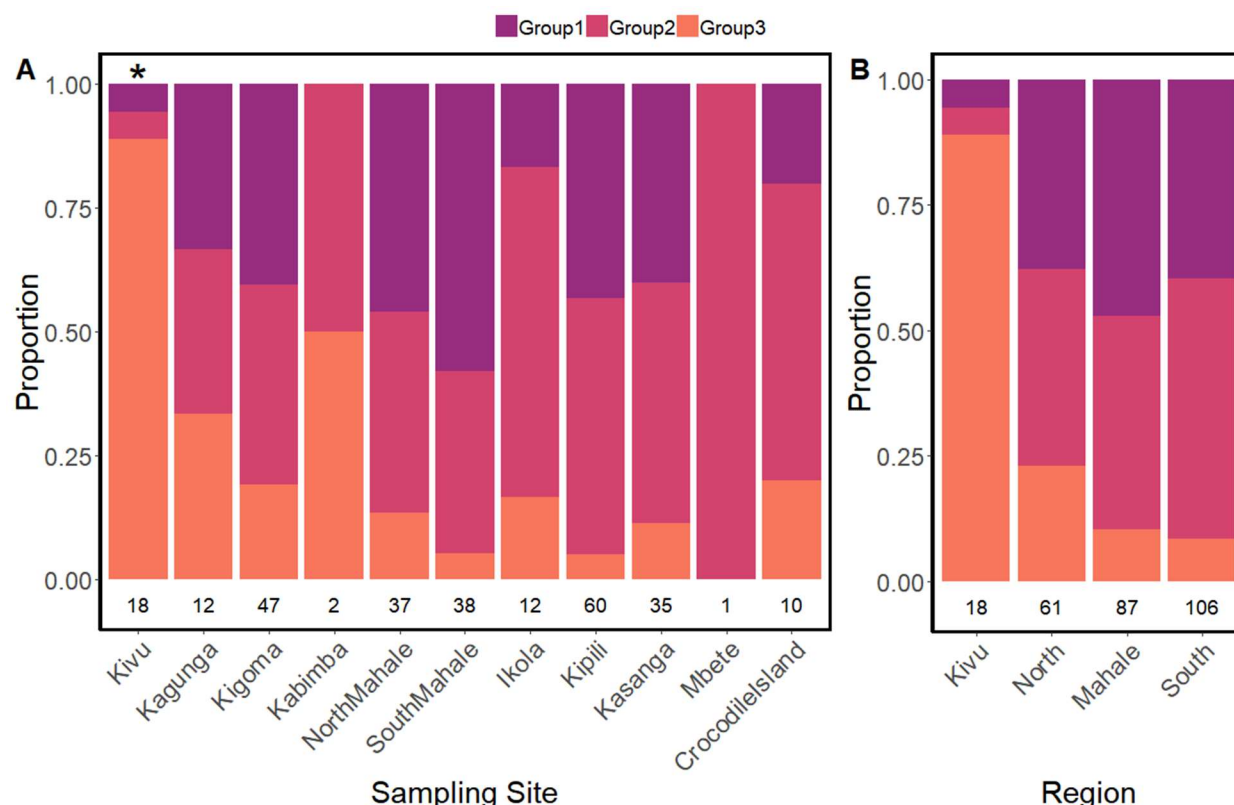

**Figure 5.** Proportion of individuals in each inversion karyotype group, by sampling site (A) and region (B). Sample sizes of individuals retained in analyses at each sampling site are indicated, as well as whether the distribution of the groups at each site differs from expectations under Hardy-Weinberg equilibrium (\* indicates rejection of HWE at the site). Sites are ordered by geographic location, from north (Kivu, Kagunga) to south (Crocodile Island). The relative proportions of each haplotype observed differed significantly between Lake Kivu and all three regions in Lake Tanganyika, while only the relative proportion of Group 3 differed among the three regions within Lake Tanganyika.

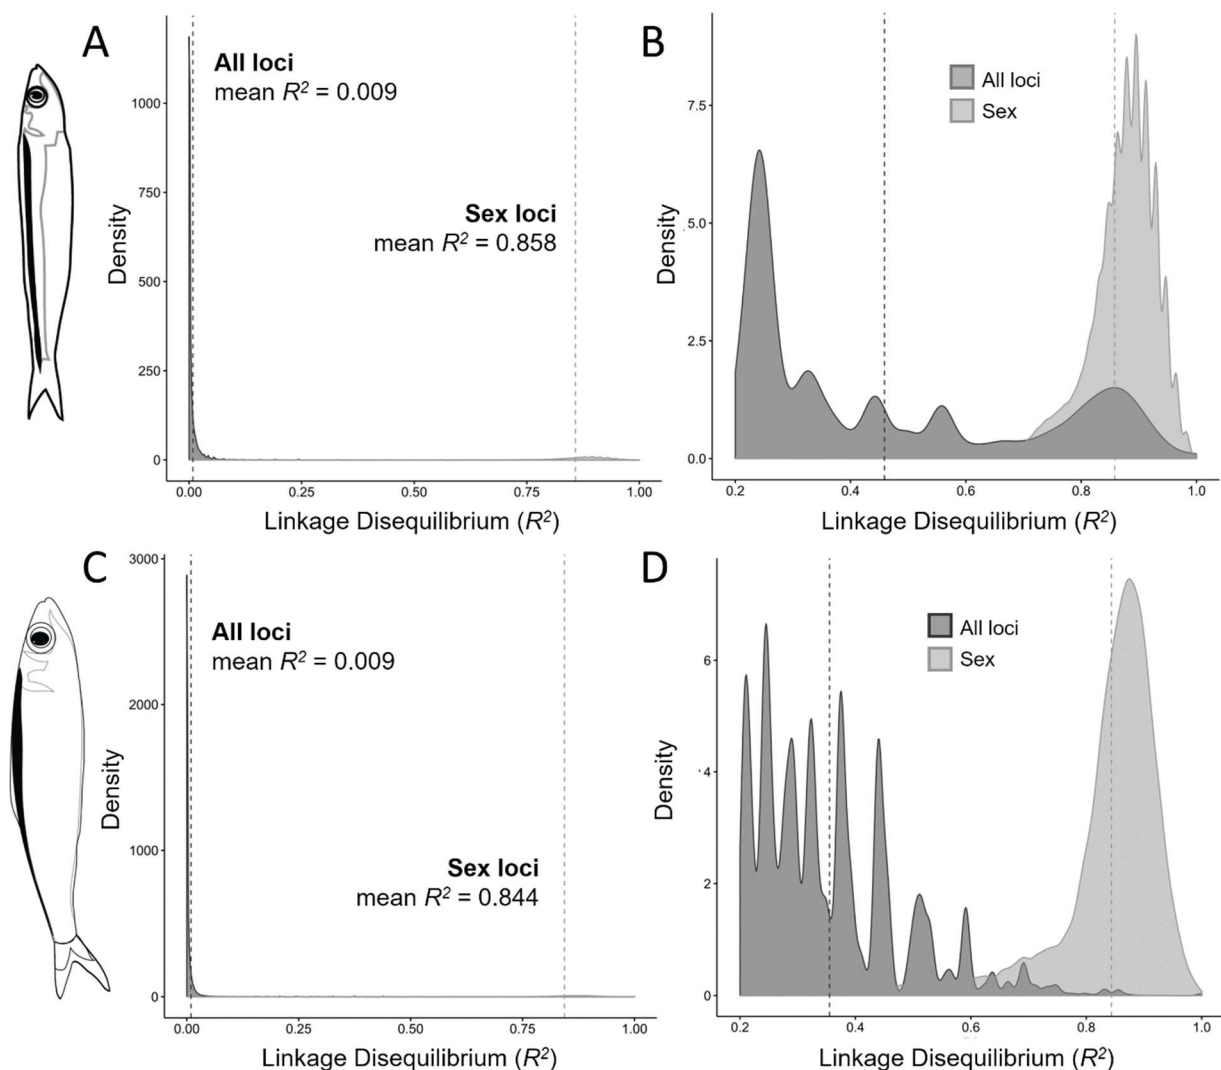

**Figure 6.** Results from an analysis of pairwise linkage disequilibrium (measured as  $R^2$ ) between SNPs in *Stolothrissa* (A-B) and *Limnothrissa* (C-D), demonstrating that loci associated with sex differences (light gray distributions) are more tightly linked than expected based on linkage values for all loci in the species-specific data sets (dark gray distributions). Panels (C) and (D) have been truncated at  $R^2 = 0.2$  to better visualize the distribution of LD values for sex-associated SNPs.



# Supplemental Figures

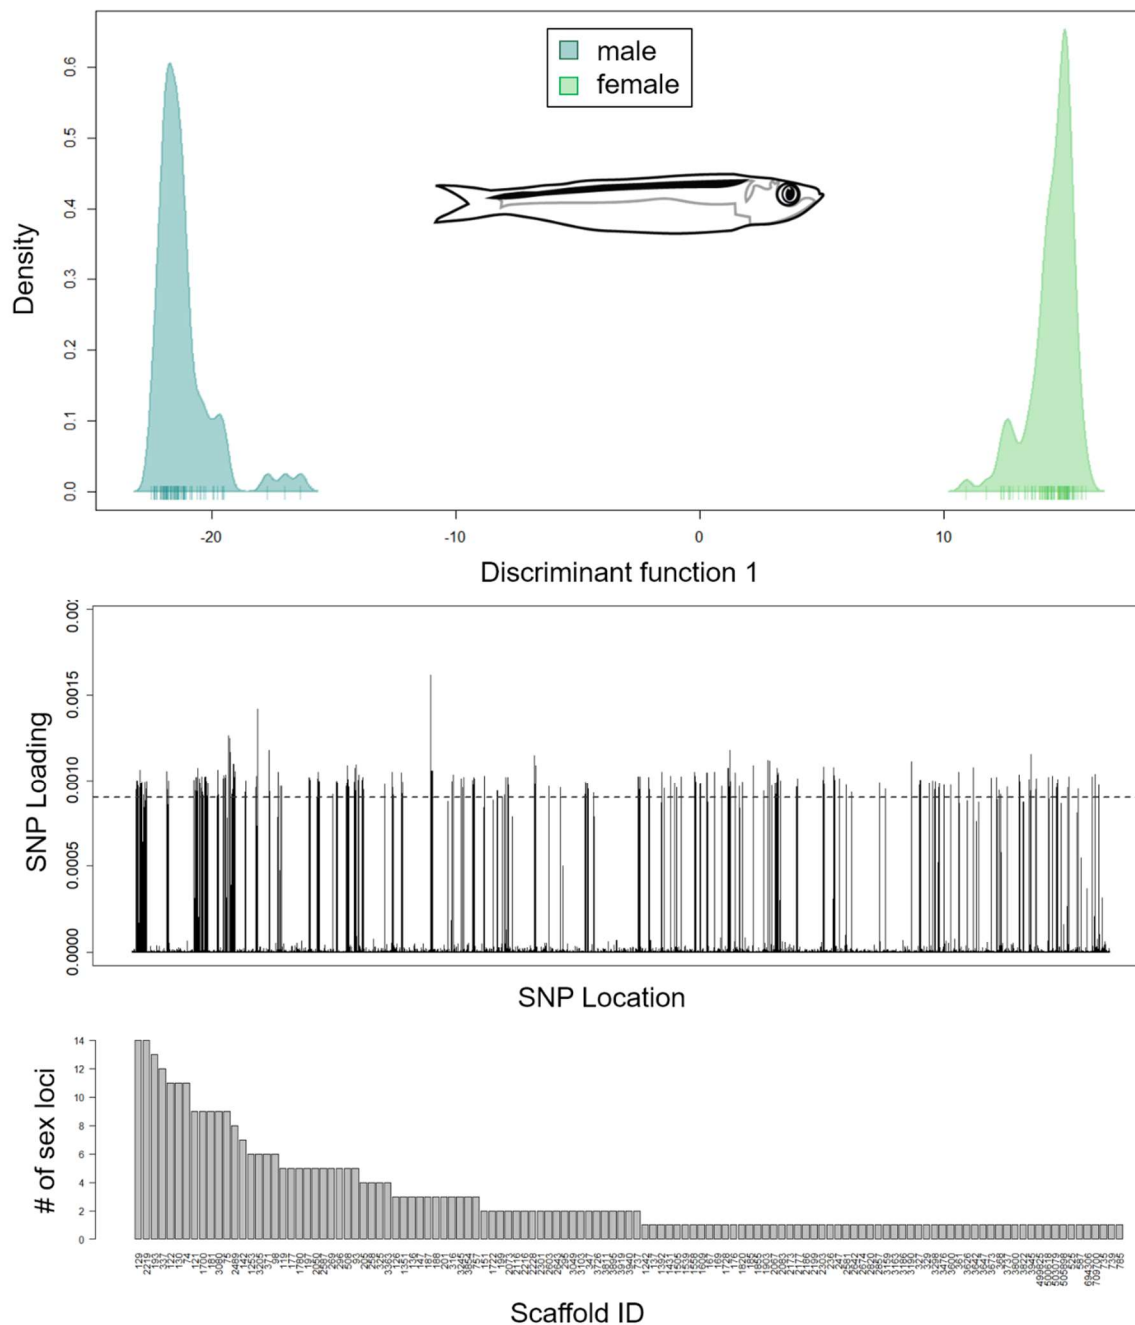

**Figure S1.** DAPC results for *Stolothrissa* differentiation between sexes, showing distribution of individuals on discriminant axis 1 (top), loadings for all SNPs (middle), and distribution of the 369 significant SNPs (loading > 0.0009) across scaffolds.



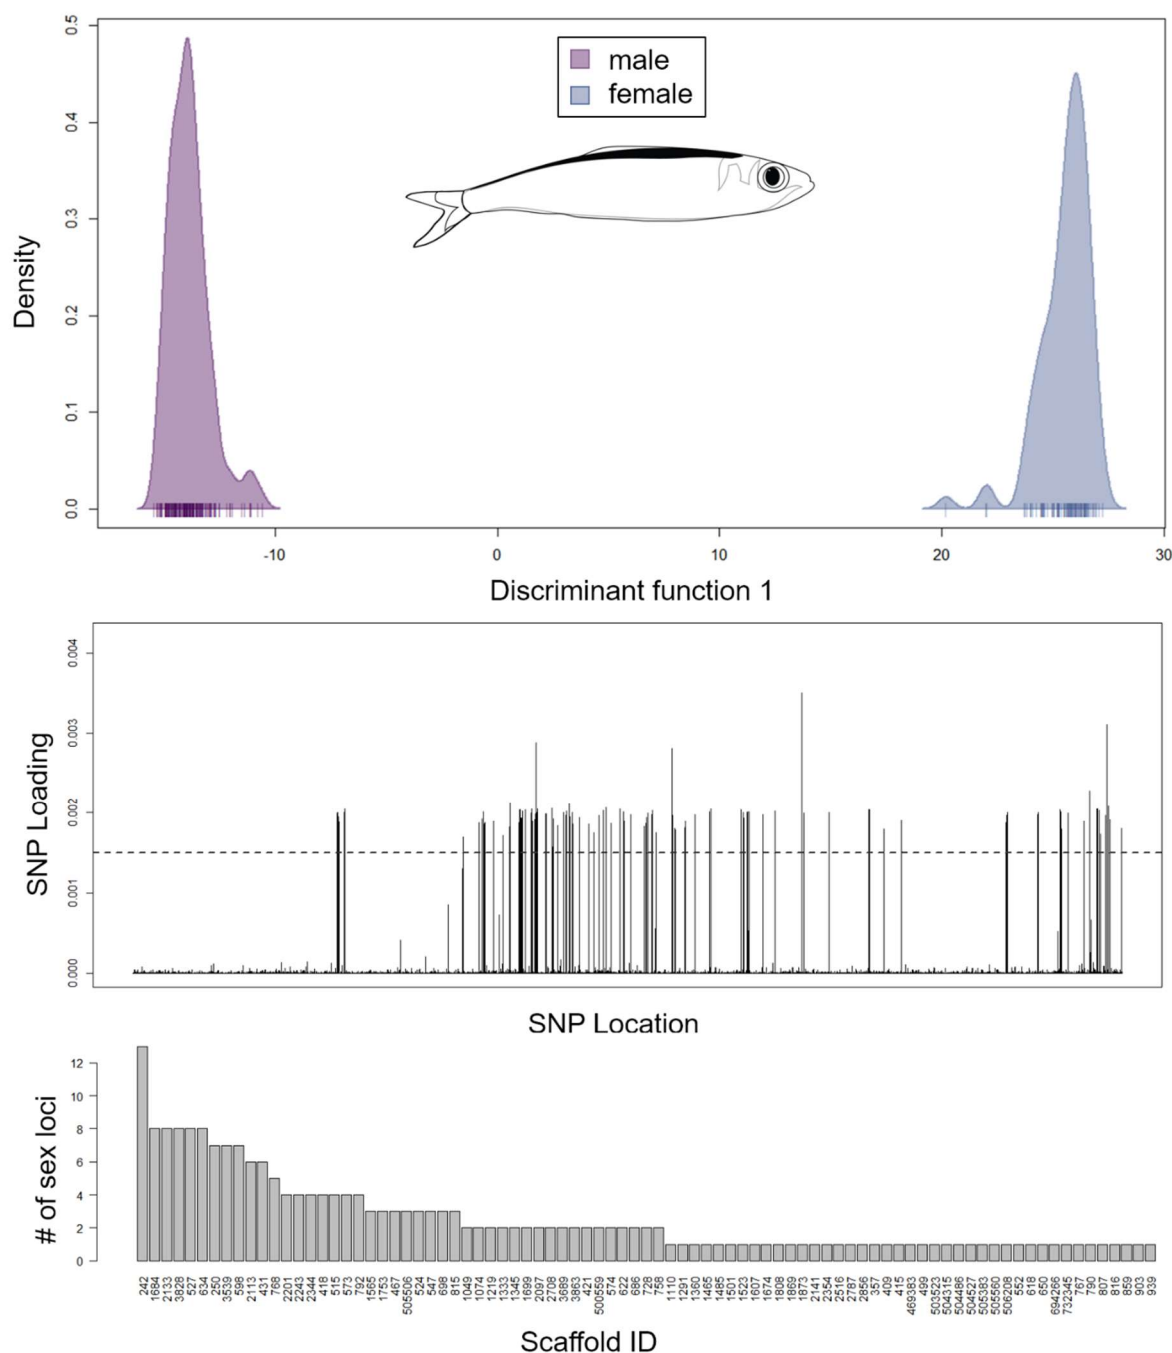

**Figure S2.** DAPC results for *Limnothrissa* differentiation between sexes, showing distribution of individuals on discriminant axis 1 (top), loadings for all SNPs (middle), and distribution of the 218 significant SNPs (loading > 0.0016) across scaffolds.

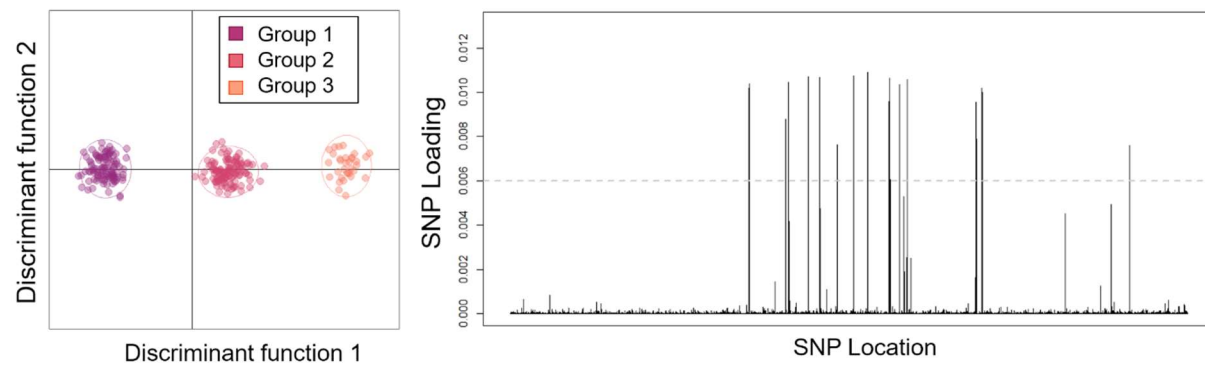

**Figure S3.** DAPC results for *Limnothrissa* differentiation between groups, showing distribution of locations on discriminant axis 1 and 2 (left), and loadings for all SNPs (right). We used a cutoff of 0.006 to identify SNPs with a significant loading on the differences between groups 1 and 3, resulting in a total of 25 significant SNPs.

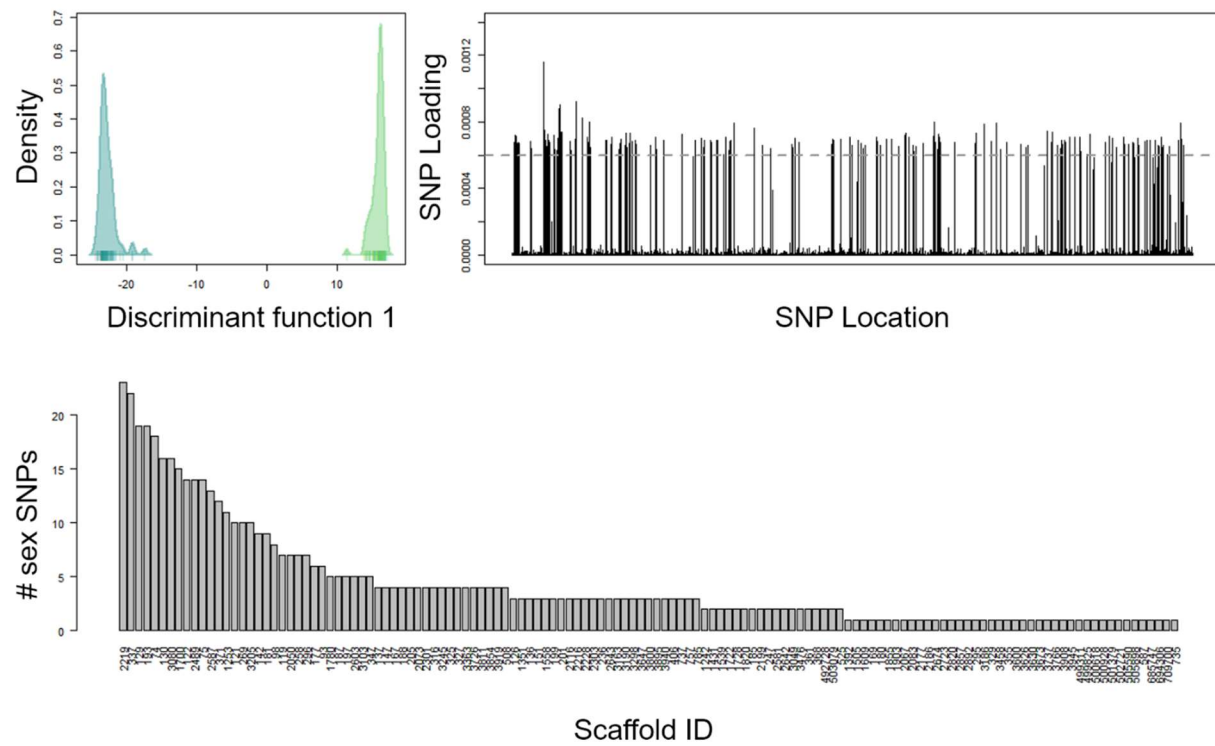

**Figure S4.** DAPC results for sex differentiation in *Stolothrissa* individuals using the combined species SNP dataset.

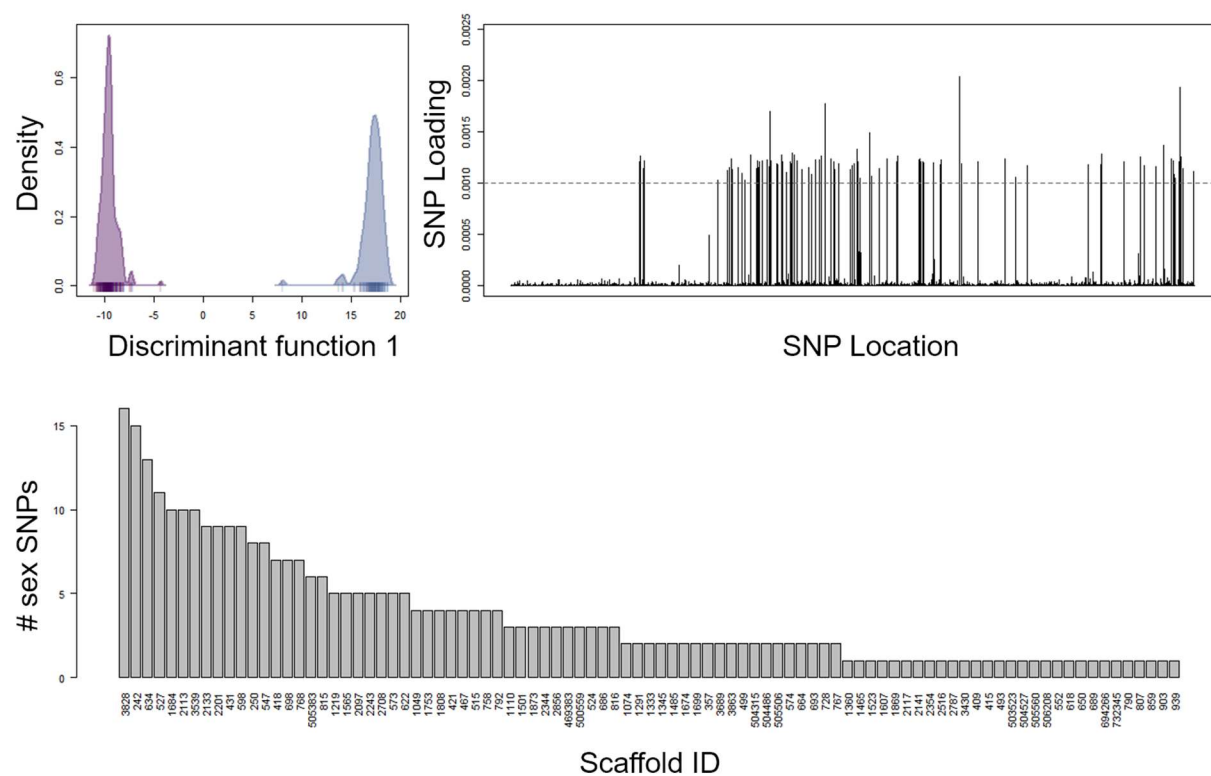

**Figure S5.** DAPC results for sex differentiation in *Limnothrissa* individuals using the combined species SNP dataset.

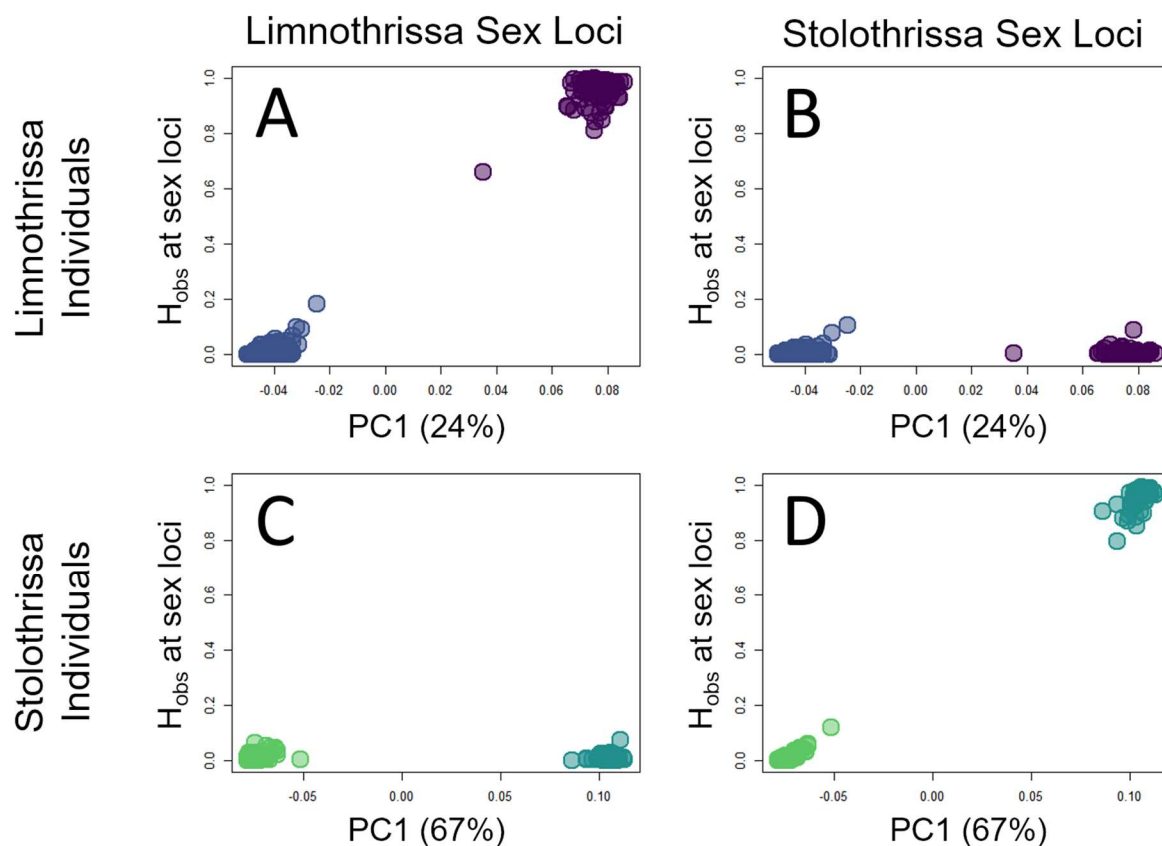

**Figure S6.** Observed heterozygosity of *Limnothrissa* individuals (A,B) and *Stolothrissa* individuals (C,D) at significant sex loci identified in *Limnothrissa* (A,C) and *Stolothrissa* (B,D), plotted against the first PC-axis for the species that the individuals belong to. Points are colored by genetically-identified sex, and PCAs were conducted on each species separately using the set of SNPs identified in the species-combined data set.

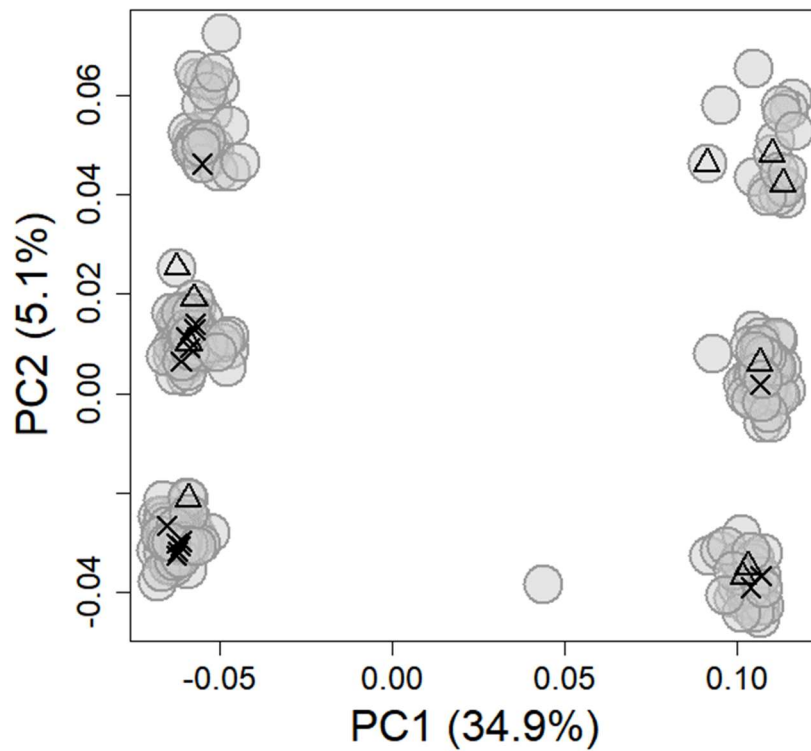

**Figure S7.** PCA of *Limnothrissa* individuals, highlighting a group of juvenile *Limnothrissa* (< 3cm) caught from the same school in Sibwesa (South Mahale) in 2015 (black X's), and nine *Limnothrissa* fry (< 2cm) caught in one scoop with a hand net in Kagunga in 2017 (black triangles). Both single-school samples included individuals from multiple different karyotypes.

Table S1 Sex determination in *Stolothrissa* and *Limnothrissa*

| <i>Stolothrissa</i> |             |                | <i>Limnothrissa</i> |             |                |
|---------------------|-------------|----------------|---------------------|-------------|----------------|
| Sample ID           | Genetic sex | Phenotypic sex | Sample ID           | Genetic sex | Phenotypic sex |
| 138863.IKO02        | female      | male           | 139100.KAS26        | male        | male           |
| 138864.IKO03        | male        | male           | 139122.KAS48        | female      | female         |
| 138866.IKO05        | female      | female         | 138826.KAT25        | female      | female         |
| 138867.IKO06        | female      | female         | 138827.KAT26        | female      | female         |
| 138868.IKO07        | male        | male           | 138828.KAT27        | female      | female         |
| 138869.IKO08        | male        | male           | 138831.KAT30        | female      | female         |
| 138870.IKO09        | female      | female         | 138832.KAT31        | female      | female         |
| 138872.IKO11        | male        | male           | 138836.KAT35        | female      | female         |
| 138873.IKO12        | female      | female         | 138842.KAT41        | female      | female         |
| 138874.IKO13        | female      | female         | 138919.IKO58        | male        | male           |
| 138883.IKO22        | male        | male           | 138955.IKO94        | male        | male           |
| 138889.IKO28        | male        | male           | 138982.KIP15        | female      | female         |
| 139217.KAG51        | female      | female         | 138994.KIP26        | female      | female         |
| 139219.KAG53        | female      | female         | 138998.KIP30        | female      | female         |
|                     |             |                | 139010.KIP42        | female      | female         |
|                     |             |                | 139011.KIP43        | female      | female         |
|                     |             |                | 139022.KIP54        | female      | female         |
|                     |             |                | 139098.KAS24        | male        | male           |
|                     |             |                | 139101.KAS27        | female      | female         |
|                     |             |                | 139117.KAS43        | female      | female         |
|                     |             |                | 139119.KAS45        | male        | male           |
|                     |             |                | 139137.KAS56        | male        | male           |
|                     |             |                | 139243.KAG77        | male        | male           |
|                     |             |                | 139245.KAG79        | female      | female         |
|                     |             |                | 139246.KAG80        | male        | male           |
|                     |             |                | 139252.KAG86        | male        | male           |
|                     |             |                | 64310.KIV01         | female      | female         |
|                     |             |                | 64311.KIV02         | female      | female         |
|                     |             |                | 64312.KIV03         | female      | female         |
|                     |             |                | 64445.KIV04         | male        | male           |
|                     |             |                | 64450.KIV05         | male        | male           |
|                     |             |                | 64452.KIV06         | male        | male           |
|                     |             |                | 64554.KIV07         | male        | male           |
|                     |             |                | 64555.KIV08         | male        | male           |
|                     |             |                | 64556.KIV09         | male        | male           |
|                     |             |                | 64557.KIV10         | female      | female         |
|                     |             |                | 64558.KIV11         | male        | male           |
|                     |             |                | 64559.KIV12         | male        | male           |
|                     |             |                | 64593.KIV13         | female      | female         |
|                     |             |                | 64595.KIV14         | female      | female         |
|                     |             |                | 64596.KIV15         | female      | female         |
|                     |             |                | 64597.KIV16         | female      | female         |
|                     |             |                | 64598.KIV17         | female      | female         |
|                     |             |                | 64599.KIV18         | female      | female         |
|                     |             |                | 64761.KIV19         | male        | male           |
