1 **Structural genomic variation leads to unexpected genetic**  
2 **differentiation in Lake Tanganyika's sardines**

3

4 Julian Junker\*<sup>1,2</sup>, Jessica A. Rick\*<sup>3</sup>, Peter B. McIntyre<sup>4</sup>, Ismael Kimirei<sup>5</sup>, Emmanuel A. Sweke<sup>5,7</sup>, Julieth  
5 B. Mosille<sup>5</sup>, Bernhard Wehrli<sup>1,6</sup>, Christian Dinkel<sup>1</sup>, Salome Mwaiko<sup>1,2</sup>, Ole Seehausen<sup>1,2</sup>, Catherine E.  
6 Wagner<sup>3</sup>

7 \* denotes equal contribution

8 1 EAWAG Swiss Federal Institute of Aquatic Science and Technology, CH-6047 Kastanienbaum,  
9 Switzerland

10 2 Division of Aquatic Ecology, Institute of Ecology & Evolution, University of Bern, CH-3012 Bern,  
11 Switzerland

12 3 Department of Botany and Program in Ecology, University of Wyoming, Laramie, Wyoming 82072  
13 USA

14 4 Department of Natural Resources, Cornell University, Ithaca NY 14850 USA

15 5 Tanzania Fisheries Research Institute (TAFIRI), Dar es Salaam, Tanzania

16 6 Institute of Biogeochemistry and Pollutant Dynamics, ETH Zurich, CH-8092 Zürich, Switzerland

17 7 Deep Sea Fishing Authority (DSFA), Zanzibar, Tanzania

18 Corresponding authors: Julian Junker ([Julian.junker@eawag.ch](mailto:Julian.junker@eawag.ch)), Jessica Rick ([jrick@uwyo.edu](mailto:jrick@uwyo.edu)) and  
19 Catherine E. Wagner ([Catherine.Wagner@uwyo.edu](mailto:Catherine.Wagner@uwyo.edu))

20

21

22

23

24

25

26

## 27 **Abstract**

28 Identifying patterns in genetic structure and the genetic basis of ecological adaptation is a core goal  
29 of evolutionary biology and can inform the management and conservation of species that are  
30 vulnerable to population declines exacerbated by climate change. We used reduced representation  
31 genomic sequencing methods to gain a better understanding of genetic structure among and within  
32 populations of Lake Tanganyika's two sardine species, *Limnothrissa miodon* and *Stolothrissa*  
33 *tanganicae*. Samples of these ecologically and economically important species were collected across  
34 the length of Lake Tanganyika, as well as from nearby Lake Kivu, where *L. miodon* was introduced in  
35 1959. Our results reveal unexpected differentiation within both *S. tanganicae* and *L. miodon* that is  
36 not explained by geography. Instead, this genetic differentiation is due to the presence of large sex-  
37 specific regions in the genomes of both species, but involving different polymorphic sites in each  
38 species. Our results therefore indicate rapidly evolving XY sex determination in the two species.  
39 Additionally, we found evidence of a large segregating inversion in *L. miodon*. We found all inversion  
40 karyotypes throughout Lake Tanganyika, but the frequencies vary along a north-south gradient, and  
41 differ substantially in the introduced Lake Kivu population. We do not find evidence for significant  
42 isolation-by-distance, even over the hundreds of kilometers covered by our sampling, but we do find  
43 shallow population structure.

44

45 **Keywords:** *Stolothrissa tanganicae*, *Limnothrissa miodon*, Lake Tanganyika, Inversion, sex-specific  
46 region

47

## 48 **Introduction**

49 Pelagic mixed fish stocks are notoriously difficult to manage (Belgrano & Fowler 2011; Botsford et al.  
50 1997) and part of this challenge lies in identifying Management Units (MUs) which are  
51 demographically independent and genetically distinct populations. In a habitat without physical  
52 barriers, low genetic differentiation is typical, as there exist few environmental restrictions to gene  
53 flow. However, there are increasingly cases detected where small genomic differences lead to

54 important variation in life history, influencing population resilience to fishing pressure (Berg et al.  
55 2017; Hutchinson 2008; Kirubakaran et al. 2016). The use of next generation sequencing methods,  
56 which can resolve such fine-scale genetic structure through sampling a large proportion of the  
57 genome, is therefore needed to shed light on population structure, particularly in species with low  
58 genetic differentiation.

59 Of particular recent interest is the role of genomic regions with reduced recombination rates, such as  
60 chromosomal inversions (e.g. Berg et al. 2017; Christmas et al. 2018; Kirubakaran et al. 2016; Lindtke  
61 et al. 2017), sex chromosome regions (Presgraves 2008; Qvarnstrom & Bailey 2009) or both  
62 (Connallon et al. 2018; Hooper et al. 2019; Natri et al. 2019) in generating genetic structure within  
63 spatially panmictic populations. The reduced recombination rates in such chromosomal regions may  
64 enable local adaptation even when gene flow is high (Kirkpatrick & Barton 2006). Furthermore, it  
65 appears that these mechanisms for restricted recombination are more prevalent in sympatric than in  
66 allopatric species (McGaugh et al 2012; Castiglio et al 2014), and fixation of inversions is faster in  
67 lineages with high rates of dispersal and gene flow (Berg *et al.* 2017; Hooper & Price 2015; Martinez  
68 *et al.* 2015). These patterns are consistent with theory where chromosomal rearrangements,  
69 capturing multiple co-adapted loci, are favored to spread in the presence of gene flow (Berg et al.  
70 2017; Kirkpatrick & Barton 2006). Identifying the genetic basis of ecological adaptation is thus a high  
71 priority in evolutionary ecology and can have important implications for population management.

72 Pelagic habitats allow for high dispersal rates due to the lack of predominant physical barriers. Well  
73 known examples of species from pelagic habitats that carry chromosomal inversions or sex-linked  
74 genomic differentiation include Atlantic cod (*Gadus moruha*) (Berg *et al.* 2017; Kirubakaran *et al.*  
75 2019; Kirubakaran *et al.* 2016) and Atlantic herring (*Clupea harengus*) (Lamichhaney *et al.* 2017;  
76 Martinez Barrio *et al.* 2016; Pettersson *et al.* 2019). In Atlantic cod and herring populations, low  
77 genome-wide divergence is interspersed with highly divergent inverted regions. These inversions in  
78 cod distinguish between resident and migrating ecotypes (Berg et al. 2017; Kirubakaran et al. 2016)  
79 and males and females (Kirubakaran *et al.* 2019), and in herring they separate spring and fall

80 spawners (Lamichhane *et al.* 2017; Martinez Barrio *et al.* 2016; Pettersson *et al.* 2019). Additionally,  
81 inverted genomic regions in sticklebacks are involved in the divergence between lake and stream  
82 ecotypes (Marques *et al.* 2016; Roesti *et al.* 2015).

83 Lake Tanganyika is volumetrically the second largest lake in the world, consisting of deep basins in  
84 the north (~1200 m) and south (~1400 m), and a shallower basin (~800 m) in the central region (Fig.  
85 1A) (McGlue *et al.* 2007). At 9-12 million years in age (Cohen *et al.* 1993), it hosts a long history of  
86 evolution, which has produced remarkable animal communities consisting largely of endemic species  
87 (Coulter 1991). Among these endemics are two sardine species, *Stolothrissa tanganyicae* and  
88 *Limnothrissa miodon*, which are sister taxa belonging to monospecific genera. Wilson *et al.* (2008)  
89 showed evidence that the sardines of Lake Tanganyika descend from relatives in western Africa and  
90 that these sister taxa diverged from a common ancestor about 8 MYA, presumably within Lake  
91 Tanganyika due to the endemic distributions of these species and the age of the basin.

92 The harvest of *S. tanganyicae* and *L. miodon* account for up to 65% of all catches within the lake  
93 (Coulter 1976, 1991; Mölsä *et al.* 2002), contributing to the second largest inland fishery on the  
94 continent of Africa (FAO 1995). The fishing industry provides employment to an estimated 160,000  
95 (Van der Knaap *et al.* 2014) to 1 million people (Kimirei *et al.* 2008) and is an important source of  
96 protein to additional millions living on the shores of Lake Tanganyika and further inland (Kimirei *et al.*  
97 2008; Mölsä *et al.* 2002; Sarvala *et al.* 2002; Van der Knaap *et al.* 2014). Due to human population  
98 growth and an increased demand for protein, fishing pressure has increased during the last decades,  
99 resulting in a decline of pelagic fish stocks (Coulter 1991; van der Knaap 2013; Van der Knaap *et al.*  
100 2014; van Zwieten *et al.* 2002). In addition, long-term decreases in fish population abundance are  
101 likely linked to the observed warming of Lake Tanganyika since the early 1900s, and further warming-  
102 induced decline in the lake's productivity is expected during the 21<sup>st</sup> century (Cohen *et al.* 2016;  
103 O'Reilly *et al.* 2003; Verburg & Hecky 2003; Verburg *et al.* 2003). Consequently, there is increasing  
104 recognition of the need to develop sustainable management strategies for the lake's pelagic fish

105 stocks (Kimirei et al. 2008; Mölsä et al. 1999; Mölsä et al. 2002; van der Knaap 2013; Van der Knaap  
106 et al. 2014; van Zwieten et al. 2002).

107 Despite the economic importance of the pelagic fisheries in this lake, little previous work has  
108 investigated the diversity and population structure of the key pelagic fish species or their  
109 evolutionary origins (but see De Keyzer et al. 2019; Hauser et al. 1995, 1998; Wilson et al. 2008).

110 Lake Tanganyika's enormous size (~670km from north to south) harbours the potential for isolation  
111 by distance patterns to emerge, and for spatial segregation that may lead to temporal variation in  
112 spawning and life history timing between distant sites. The nutrient availability in the water column  
113 is regulated by trade winds and complex differential cooling, leading to regions of higher and lower  
114 productivity within the lake (Bergamino *et al.* 2010; Plisnier *et al.* 1999; Verburg *et al.* 2011).

115 Mulimbwa et al (2014a and b) found that reproduction may additionally correlate with food  
116 availability, suggesting that reproduction may vary spatially in conjunction with spatial differences in  
117 primary productivity. Furthermore, spawning peaks in *S. tanganyicae* occur at different times in the  
118 southern and northern basin of Lake Tanganyika (Chapman & van Well 1978; Ellis 1971). Such  
119 patterns of spatial and temporal differences in spawning suggest that geographic differentiation in  
120 life history timing may exist between distant sites.

121 Despite their close relationship, *S. tanganyicae* and *L. miodon* have substantial differentiation in life  
122 histories. *S. tanganyicae* forms large schools and has a fully pelagic life cycle, including pelagic  
123 spawning (Coulter 1970, Mannini 1998a). Fertilized embryos of *S. tanganyicae* develop while they sink  
124 in the water column (at a rate of 4-5 cm/minute) and the larvae hatch after 24-36h (Matthes 1967).

125 There is evidence that juveniles between 10mm and 50mm tend to move in-shore to escape  
126 predation, forming mixed schools with *L. miodon* juveniles, and move off-shore again at sizes larger  
127 than 50mm (Coulter 1991). In contrast, in *L. miodon* spawning occurs in the near shore (Coulter 1991,  
128 Ellis 1971, Mannini 1998a) and individuals only move to the pelagic once they reach large sizes. For *L.*  
129 *miodon* in Lake Kivu, spawning fish have been found both inshore and offshore, so it is unclear  
130 whether spawning is strictly littoral in this introduced population (Spliethoff *et al.* 1983).

131 *S. tanganyicae* has a maximum mean total length of about 100mm, compared to *L. miodon* where the  
132 adult mean total length is about 120mm (Coulter 1991; Mannini *et al.* 1996), with the former species  
133 living about 1.5 years, whereas the latter lives for about 2.5 years (Coulter 1991; Pearce 1985).  
134 Sexually mature individuals (*S. tanganyicae*: female ~75mm, males ~70mm; *L. miodon*: females ~75  
135 mm and males at ~64mm in southern Lake Tanganyika and ~62mm for females and ~61mm for males  
136 in Lake Kivu; Ellis 1971, Spliethoff *et al.* 1983) exist year round but fisheries data indicate that  
137 spawning peaks exist (Coulter 1970, Ellis 1971, Mannini 1998a, Marlier 1957), with peaks happening  
138 earlier in the southern than in the northern part of the lake in *S. tanganyicae* (Coulter 1991, Ellis  
139 1971). In introduced *L. miodon* in Lake Kivu, spawning takes place year round but peaks can also be  
140 observed (Spliethoff *et al.* 1983)

141 Juvenile *S. tanganyicae* feed mostly on phytoplankton (Coulter 1991) and switch to zooplankton,  
142 shrimp and fish larvae when they move offshore (>50mm length) (Chèné 1975). Juvenile *L. miodon*  
143 feed mainly on phyto- and later on zooplankton and shrimp, but larger specimens also prey on *S.*  
144 *tanganyicae* or young *L. miodon* (Coulter 1991; Mannini 1998a). In the pelagic, schools are in deep  
145 waters during the day and move upwards at dusk and downwards at dawn following the diurnal  
146 vertical migration movements of copepods. Although this vertical migration is clear, different  
147 opinions exist about the lateral migration of the two species. There are indications for extensive  
148 movement based on echo sounding studies by Johannesson (1975) and Chapman (1976), and van  
149 Zwieten *et al.* (2002) suggest in- and offshore movement based on catch data (Coulter 1991). In  
150 contrast, other studies have suggested little movement in *S. tanganyicae* due to local increases in *S.*  
151 *tanganyicae* populations when local predator abundance declined due to fishing pressure at the same  
152 locality (Coulter 1991, Ellis 1978).

153 There are some indications of genetic differentiation within pelagic fish populations of Lake  
154 Tanganyika known from basic genetic work conducted two decades ago. For the sardines, these  
155 studies found no clear genetic population structure at a large geographical scale (Hauser *et al.* 1998;  
156 Kuusipalo 1999), but some small-scale differences were found for *L. miodon* (Hauser *et al.* 1998).

157 However, the genetic methods used in these older studies (RAPDs and microsatellites) have limited  
158 power and are known to suffer from error (RAPD, Williams et al. 1990). In *S. tanganyicae*, De Keyzer et  
159 al. (2019) recently used an mtDNA data set and a restriction site associated DNA (RAD) sequencing  
160 data set based on 3504 SNPs and 83 individuals, sampled from the north, middle, and south of Lake  
161 Tanganyika, finding little evidence for spatial genetic structure.

162 In this study, we focus on analysing patterns of genetic diversity and divergence in both sardine  
163 species, *S. tanganyicae* and *L. miodon*, using next-generation sequencing based approaches. We  
164 sampled sardines from 13 sites spanning from the north to the south of Lake Tanganyika (Fig. 1). We  
165 also included *L. miodon* individuals from the introduced population of this species present in Lake  
166 Kivu. Our null hypothesis was simple: the surface water of a large lake is horizontally well mixed and  
167 therefore provides a relatively homogeneous habitat. Pelagic fish can move freely and therefore due  
168 to the uniform environment, we should expect a lack of genetic structure of their populations due to  
169 free interbreeding. Using reduced representation genomic sequencing (RAD, Baird et al. 2008) we  
170 indeed do not find substantial spatial genetic structure in either species, supporting this null  
171 hypothesis. However, many loci deviating from Hardy-Weinberg equilibrium differentiated the sexes  
172 in our samples, suggesting that these species have large sex-determining regions. Furthermore, we  
173 find additional cryptic genetic diversity in *L. miodon* that is consistent with the existence of a  
174 chromosomal inversion. Additionally, there is some evidence for very weak yet distinct sympatric  
175 genetic groups in both sardines which differ in frequency across sampling sites but are overlapping.  
176 However, these signals are based on few loci, and this structure is not evident in PCAs. This weak  
177 genetic structure may be the result of selection, or additional structural genomic variation. However,  
178 there is no evidence for significant isolation-by-distance, despite the large geographic scale at which  
179 we sampled. The low spatial genetic structure within these species facilitated the detection of these  
180 differentiated loci and genomic structural variation, which may be related to sex-specific and local  
181 adaptation.

182

## 183 **Material and Methods**

### 184 *Study system and sampling*

185 Our samples from Lake Tanganyika come from Tanzanian, Congolese and Zambian sites and were  
186 collected between the years 2015 and 2017. Additionally, we added Rwandan *L. miodon* sampled in  
187 2013 from Lake Kivu, where the species was introduced during the 1950s (Collart 1960, 1989; Hauser  
188 *et al.* 1995) (Fig. 1 and Table 1). These fish included some individuals that were collected live, some  
189 that were collected dead (from fishermen), and some that were collected dried (from markets). For  
190 fish collected live, each fish was processed according to our standard sampling protocols, during  
191 which we took a cuvette photograph of the live fish and subsequently euthanized the fish with an  
192 overdose of MS222, and took fin clips and muscle tissue samples for genetic analysis (stored in  
193 ethanol) and stable isotope analysis (dried), respectively. The specimens were preserved in  
194 formaldehyde and then archived in the collections at EAWAG (samples from the years 2013, 2016,  
195 2017), the University of Wyoming Museum of Vertebrates (2015 samples), or the University of  
196 Wisconsin- Madison (2015 samples). Most fish for this study were obtained from fishermen and were  
197 already dead, and in this case we completed this same protocol without euthanasia. For fish that  
198 were desiccated prior to collection, we stored the whole fish dried, took desiccated fin clips for DNA  
199 extraction, and preserved the remaining dried specimen in museum collections.

200

### 201 *Phenotypic sexing*

202 Tanganyikan sardines caught by fishermen are frequently dried after landing and although this does  
203 not inhibit the extraction of high-quality DNA, desiccated individuals cannot be accurately sexed.  
204 Therefore, we dissected 34 *L. miodon* and 15 *S. tanganyicae* that were euthanized and preserved in  
205 formalin just after being caught. We chose only individuals that were > 70mm in length, fully mature,  
206 and in excellent condition, to accurately determine whether each fish, based on their gonads, was



207 male or female. We used these phenotypically sexed individuals to test whether inferred genetic  
208 groups correlated to sex in each species.

209

### 210 *RAD sequencing*

211 Once returned from the field, tissues for genetic analysis were stored in ethanol at -20°C prior to  
212 DNA extraction. We extracted DNA from 475 individuals (181 *S. tanganyicae*; 294 *L. miodon*) and  
213 obtained genomic sequence data for these individuals using a reduced-representation genomic  
214 sequencing approach (RADseq, (Baird *et al.* 2008)). The DNA from all individuals was extracted using  
215 Qiagen DNeasy Blood and Tissue kits (Qiagen, Switzerland). All individuals were barcoded, then  
216 pooled and divided into 10 RAD libraries for sequencing. For 190 individuals collected in 2015, the  
217 DNA was standardized to 20ng/μL at the University of Wyoming, prepared for RAD sequencing by  
218 Floragenex Inc. (Eugene, Oregon), and sequenced at the University of Oregon on an Illumina  
219 HiSeq2000 (100bp SE), with one library sequenced per lane. For the Floragenex libraries, library prep  
220 followed the protocol in Baird *et al.* (2008), and individuals were multiplexed in groups of 95  
221 individuals using P1 adapters with custom 10 base pair barcodes, and fragments between 200 and  
222 400bp were selected for sequencing. To avoid library effects, each individual was sequenced in two  
223 different libraries and the reads were combined after sequencing. The other 296 individuals collected  
224 in 2013, 2016 and 2017, were prepared for sequencing at EAWAG following the protocol by Baird *et*  
225 *al.* (2008) with slight modifications, including using between 400ng and 1000ng genomic DNA per  
226 sample and digesting with *SbfI* overnight. We multiplexed between 24 and 67 of these individuals per  
227 library and used P1 adapters (synthesized by Microsynth) with custom six to eight base pair  
228 barcodes. These six libraries were sheared using an S220 series Adaptive Focused Acoustic (AFA)  
229 ultra-sonicator (Covaris Inc. 2012) with the manufacturer's settings for a 500 bp mean fragment size.  
230 The enrichment step of library preparation was done in eight aliquots with a total volume of 200 μl.  
231 Volumes were combined prior to a final size selection step using a SageELF (Sage Scientific  
232 Electrophoretic Lateral Fractionator; Sage Science, Beverly, MA), during which we selected fragments

233 with a size between 300 and 700bp. Sequencing was done by the Lausanne Genomic Technologies  
234 sequencing facilities of the University of Lausanne, Switzerland. We sequenced each of six libraries  
235 on a single lane of an Illumina HiSeq2000 (100bp SE).

236

#### 237 *Sequence data preparation*

238 We filtered raw sequencing reads from each library to remove common contaminants by first  
239 removing PhiX reads using bowtie2 (Langmead & Salzberg 2012), and then filtering reads for an  
240 intact *Sbfl* restriction site. We then de-multiplexed the fastq file and trimmed the reads down to 84  
241 nucleotides using process\_radtags from Stacks v1.26 (Catchen *et al.* 2013) and a custom bash script.  
242 The FASTX-toolkit v.0.0.13 ([http://hannonlab.cshl.edu/fastx\\_toolkit/](http://hannonlab.cshl.edu/fastx_toolkit/)) was used for quality filtering. In  
243 a first step, we kept only reads with all base quality scores greater than 10; in a second step, we  
244 removed all reads with more than 5% of the bases with quality score below 30.

245

#### 246 *Reference genome assembly*

247 We generated a reference genome from a male *L. miodon* individual collected near Kigoma,  
248 Tanzania, in 2018, to use in aligning our RAD sequencing reads. High molecular weight DNA was  
249 extracted from fin tissue using the Qiagen HMW gDNA MagAttract Kit, and then libraries were  
250 prepared using 10X Genomics Chromium library preparation at the Hudson-Alpha Institute for  
251 Biotechnology Genomic Services Laboratory (Huntsville, AL). The sequencing libraries were then  
252 sequenced on the Illumina HiSeq Xten platform (150bp PE reads). Read quality was checked using  
253 FASTQC (v 0.1.2, Andrews 2010), and reads were then assembled using 10X Genomics' Supernova  
254 v2.0 assembly software, using a maximum of 500 million reads. We assessed assembly completeness  
255 using QUAST-LG (v 5.0.0, Mikheenko *et al.* 2018), which computes both standard summary statistics  
256 and detects the presence of orthologous gene sequences.

257

258 *Alignment to the reference genome and SNP calling*

259 Reads for all *L. miodon* and *S. tanganyicae* individuals were aligned to the reference genome using  
260 BWA mem (v0.7.17, Li & Durbin 2009) with default settings, after the initial read filtering steps with  
261 the FASTX-toolkit discussed above. We chose to align individuals from both species to our draft  
262 reference genome after observing high mapping rates in both species. Following alignment, we  
263 excluded any individuals with < 50,000 reads aligned to the reference genome. Subsequent analyses  
264 were performed on the remaining 178 *S. tanganyicae* and 287 *L. miodon* individuals with greater than  
265 50,000 reads aligned.

266 We identified variable sites in three different sets of individuals using SAMtools mpileup (v1.8, Li et  
267 al. 2009b) and bcftools (v1.8, Li et al. 2009a): (1) all individuals; (2) only *L. miodon* individuals; and (3)  
268 only *S. tanganyicae* individuals. In each of these data sets, we omitted indels and kept only high-  
269 quality biallelic variant sites (QUAL < 20 and GQ > 9). We obtained consistent results using different  
270 combinations of more stringent and relaxed filtering steps. The results shown here are based on a  
271 filtering as follows: within the species-specific data sets (where we had either only *S. tanganyicae* or  
272 only *L. miodon* individuals), we filtered SNPs using VCFTOOLS (Danecek et al. 2011) to allow no more  
273 than 50% missing data per site, removed SNPs with a minor allele frequency less than 0.01, and only  
274 called genotypes with a minimum read depth of 2. For the data set including both species, we  
275 relaxed the missing data filter to allow sites with up to 75% missing data.

276 We checked for library effects within our data by plotting a PCA of genotypes called within *L. miodon*  
277 and within *S. tanganyicae*, to ensure that our data from different years and library preparation  
278 methods were compatible. After observing evidence for library effects within both our *L. miodon* and  
279 *S. tanganyicae* data sets (Fig. S1A and S1C), we filtered to keep only SNPs present in individuals from  
280 libraries sequenced at both facilities. After removing these library-specific SNPs, we again checked  
281 for library effects to ensure that they no longer were evident (Fig. S1B, S1D, S2 and S3).

282

283 *Population structure and outlier detection*

284 We used the species-combined data set for two analysis: first, for a PCA testing for genetic  
285 differentiation between *S. tanganyicae* and *L. miodon*; and second, to test if sex linked loci overlap  
286 between the two species. All other analyses were done using the single species data sets.

287 After removing individuals with more than 25% missing data at the genotyped SNPs, we used the  
288 species-combined data set to conduct principal component analysis (PCA) on the genotype  
289 covariance matrix, using `prcomp` from the package `stats` (v3.5.3) in R. To delineate and visualize  
290 distinct groups within our data without a priori group assignments, we performed genetic-based K-  
291 means clustering (`find.clusters` from `adegenet`; Jombart 2008) for K=4 groups. We then used these  
292 groupings to assign individual fish to species and clusters within species. We combined these  
293 clustering results with sexed phenotypes to confirm the identity of each of the four clusters. We then  
294 conducted two discriminant analysis of principal components (DAPC, Jombart *et al.* 2010) analyses to  
295 identify loci contributing to the difference between the two clusters within each of the species. To  
296 identify loci with significant loadings, we simulated null expectations by randomizing genotypes  
297 among individuals at each locus, performing DAPC on the randomized data sets, and repeating the  
298 randomization 1000 times. We used the loadings from these randomized DAPC runs to create null  
299 distributions for each of *L. miodon* and *S. tanganyicae*. We identified SNPs with loadings above the  
300 99% quantile of the null distribution as significant in each analysis, and compared those SNPs  
301 identified in each species.

302 We then moved to working with each species individually in the species-specific data sets. We first  
303 used PCA on the genotype covariance matrices to visualize structure within each species. After  
304 observing that the primary axis of differentiation in both *S. tanganyicae* and *L. miodon* was based on  
305 sex in the species-combined data set, we then used the single-species SNP data sets and the R  
306 package `adegenet` (Jombart 2008) to conduct DAPC on males versus females of each species to  
307 identify loci contributing to these sex differences. We simulated null expectations for SNP loadings in  
308 the DAPC as described above, for each of *L. miodon* and *S. tanganyicae*. We again identified SNPs with

309 loadings above the 99% quantile of the null distribution as significant in each analysis. We then  
310 calculated heterozygosity for these sex-associated loci using adegenet in R.

311 In *L. miodon*, the secondary axis of genetic differentiation clearly split the population into three  
312 distinct genetic groups. To investigate the genetic basis of these groupings, we again used genetic-  
313 based K-means clustering to assign individuals to groups. After assigning all individuals to one of the  
314 three distinct groups based on clustering, we calculated the frequencies of the three groups at each  
315 sampling site and within each lake basin (i.e. north, middle, south). To determine whether the  
316 distribution of individuals among the clusters varied between regions in Lake Tanganyika, we  
317 conducted a two-proportion z-test (prop.test in R) between the three general regions in Lake  
318 Tanganyika, as well as between each of these and Lake Kivu.

319 We then used DAPC to identify the loci with high loadings on the differentiation between the two  
320 most extreme groups, using the *L. miodon*-only data set with Lake Kivu individuals omitted. Once  
321 again, we identified SNPs significantly associated with group delineation by creating a null  
322 distribution and selecting those SNPs above the 99% quantile of the null. We then calculated  
323 heterozygosity for these significant loci using adegenet in R. Because patterns of heterozygosity were  
324 consistent with these three groups being determined by a segregating chromosomal inversion, we  
325 then tested whether the three genotypes are in Hardy-Weinberg Equilibrium within each of the three  
326 distinct geographic regions and within Lake Kivu.

327 *S. tanganyicae* and *L. miodon* are sister species and if they share sex determining regions, then we  
328 would expect them to map to similar locations on the *L. miodon* reference genome. However, if the  
329 sets of sex-linked SNPs of each species map to different regions, then we expect that one or either of  
330 the species have switched the chromosomes used in sex determination (“turnover” of sex  
331 determining regions). This could occur either from the translocation of a sex-determining locus to a  
332 new genomic location, or due to the origin of a new mutation with sex-determination function  
333 (Jeffries *et al.* 2018). We therefore assessed whether the same genomic regions explain genetic  
334 differentiation between sexes in the two species. For this, we compared the location of SNPs

335 identified in each of the *S. tanganyicae* and *L. miodon* DAPC analyses, both using the species-specific  
336 and combined SNP data sets, by calculating the proportion of scaffolds shared among the two sets of  
337 significant SNPs. As an additional comparison between the two species, we calculated the proportion  
338 of *L. miodon* sex-linked SNPs that were polymorphic in *S. tanganyicae*, and vice versa, as well as the  
339 observed heterozygosity of *L. miodon* individuals at *S. tanganyicae* sex-linked SNPs, and vice versa.

340

#### 341 *Geographic population structure*

342 For each species separately, we investigated population structure beyond sex differences to  
343 determine whether there is any geographic signal of differentiation within the two species. We  
344 removed the scaffolds containing sex-associated SNPs in the species-specific data sets for each  
345 species. In *L. miodon* we additionally removed the scaffolds containing SNPs associated with the  
346 inverted region. We then calculated  $F_{ST}$  between all sampling site pairs and between basins using the  
347 Reich-Patterson  $F_{ST}$  estimator (Reich *et al.* 2009) and estimated 95% confidence intervals using 100  
348 bootstrap replicates. We used these estimates in a Mantel test (`mantel.randtest` from `adegenet` in R)  
349 for each species, to test for a possible association between genetic distances and Euclidean  
350 geographic distances between sites (i.e. isolation by distance). For the Mantel tests, we calculated  
351  $F_{ST}/(1-F_{ST})$  and omitted Lake Kivu, as well as locations with fewer than 10 individuals.

352 To formally test for structure within the *L. miodon* and *S. tanganyicae* populations, we used the  
353 hierarchical Bayesian genetic-based clustering program entropy (Gompert *et al.* 2014), a program  
354 and model much like STRUCTURE (Pritchard *et al.* 2000, Falush *et al.* 2003), which leads to estimates  
355 of allele frequencies in putative ancestral clusters and admixture proportions for individuals. Both  
356 entropy and STRUCTURE incorporate no *a priori* assumptions about assignment of individuals to  
357 clusters and require only the specification of the number of ancestral clusters (K). Entropy  
358 additionally incorporates uncertainty about individuals' true genotypes by taking genotype  
359 likelihoods from `bcftools` (Li 2011) as input. Thus, the model integrates over genotype uncertainty,

360 appropriately propagating uncertainty to higher levels of the model. Additionally, entropy uses  
361 calculations of deviance information criterion (DIC) for model fit to choose among models with  
362 different numbers of ancestral population clusters (K).

363 To compare support for different numbers of clusters, we ran entropy for K=1 to K=10 for each  
364 species. After removing SNPs on scaffolds containing sex-associated SNPs (and removing inversion-  
365 related scaffolds in *L. miodon*), we ran three independent 80,000 MCMC step chains of entropy for  
366 each value of K, discarding the first 10,000 steps as burn-in. We retained every 10<sup>th</sup> value (thin=10)  
367 and obtained 7000 samples from the posterior distribution of each chain. We estimated posterior  
368 means, medians, and 95% credible intervals for parameters of interest. We checked MCMC chains for  
369 mixing and convergence of parameter estimates by plotting a trace of the MCMC steps for  
370 parameters of interest. We then calculated DIC for each value of K and used these to assess which  
371 model provided the best fit for the structure in our data. Finally, we conducted an ANOVA on group  
372 assignment probabilities (q) for individuals, using sampling site as a factor, to determine whether the  
373 means of assignment probabilities to each group differed significantly between sites. We additionally  
374 assigned individuals to groups for K > 1 using a threshold of group membership probability of q = 0.6,  
375 and calculated Reich-Patterson  $F_{ST}$ .

376

### 377 *Genetic diversity within clusters*

378 We calculated genetic diversity within the different intraspecific groups using the aligned BAM files in  
379 ANGSD (v0.931, Korneliussen *et al.* 2014), again using the *L. miodon* genome as a reference. Methods  
380 employed in ANGSD take genotype uncertainty into account instead of basing analyses on called  
381 genotypes, which is especially useful for low- and medium-depth genomic data (Korneliussen *et al.*  
382 2014), such as those obtained using RAD methods. From these alignment files, we first calculated the  
383 site allele frequency likelihoods based on individual genotype likelihoods (option -doSaf 1) using the  
384 samtools model (option -GL 1), with major and minor alleles inferred from genotype likelihoods

385 (option -doMajorMinor 1) and allele frequencies estimated according to the major allele (option -  
386 doMaf 2). We filtered sites for a minimum read depth of 1 and a maximum depth of 100, minimum  
387 mapping quality of 20, and minimum quality (q-score) of 20. In addition, we omitted all scaffolds that  
388 contained sex or inversion loci. From the site allele frequency spectrum, we then calculated the  
389 maximum likelihood estimate of the folded site frequency spectrum (SFS) using the ANGSD realSFS  
390 program (with option -fold 1). The folded SFS was used to calculate per-site theta statistics and  
391 genome-wide summary statistics, including genetic diversity, using the ANGSD thetaStat program  
392 (Korneliussen *et al.* 2013). We performed each of these steps on all fish from each of *L. miodon* and  
393 *S. tanganyicae*, and then individually for each sampling site within each species.

394

#### 395 *Linkage disequilibrium among loci*

396 To investigate the extent to which the loci identified by DAPC are linked to one another, we used  
397 PLINK (v1.9, Purcell *et al.* 2007) to calculate pairwise linkage disequilibrium between all pairs of SNP  
398 loci in our *L. miodon* and *S. tanganyicae* data sets. Linkage disequilibrium was measured as the  
399 squared allelic correlation ( $R^2$ , Pritchard & Przeworski 2001). We then subsetted each of these  
400 comparisons to include only the sex-linked SNPs identified using DAPC, and compared the  
401 distribution of linkage values among the sex-linked SNPs to those values between all SNPs in the data  
402 set for each of the two species. We then performed the same comparison for loci implicated in  
403 differences among the three inversion groups in *L. miodon*. To determine whether sex and grouping  
404 loci are more linked than average across the genome, we performed a Mann-Whitney U test  
405 (`wilcox.test` in R) on the sets of linkage values.

406



## 407 Results

### 408 Genome assembly and variant calling

409 The final assembly of the 10X Genomics Chromium-generated reference genome for *L. miodon*,  
410 based on ~56x coverage, comprised 6730 scaffolds of length greater than 10Kb. The assembly had a  
411 scaffold N50 of 456Kb and a total assembly size of 551.1Mb. The BUSCO score of the genome was  
412 83.5% complete single-copy BUSCO genes, 4.62% fragmented and 11.82% missing BUSCO genes. We  
413 retained only scaffolds > 10Kb in length for the reference genome used for downstream alignment of  
414 the RAD reads.

415 The Floragenex RAD libraries yielded between 306 and 328 million reads including 21–23%  
416 bacteriophage PhiX genomic DNA, while the libraries sequenced at the Lausanne Genomic  
417 Technologies sequencing facilities yielded between 167 and 248 million reads each. This resulted in  
418 an average of 2.5 million reads per *S. tanganyicae* individual and 4.3 million reads per individual in *L.*  
419 *miodon*. On average, the mapping rate for *S. tanganyicae* individuals' RAD reads to the *L. miodon*  
420 reference genome was 80.2%, whereas it was 80.0% for *L. miodon* individuals. Mean read depth was  
421 slightly lower overall in *S. tanganyicae* than *L. miodon* (64.5 reads vs 73.4 reads), and *S. tanganyicae*  
422 males had slightly lower mean read depths (average 61.0 reads) than *S. tanganyicae* females (mean  
423 67.9 reads; Fig. S4). The ratio of read depths between males and females averaged 1.0 in *L. miodon*,  
424 while females in *S. tanganyicae* averaged 1.12x more reads than males (Fig. S5A). These mapping  
425 rates resulted in 1,224,115 unfiltered variable sites in *L. miodon* and 636,238 unfiltered variants in *S.*  
426 *tanganyicae*. We removed 6 *S. tanganyicae* individuals and 8 *L. miodon* individuals due to too few  
427 reads mapped or too much missing data. After filtering for missing data (50% for species specific data  
428 sets and 75% for the species combined data set) and minor allele frequency (MAF > 0.01), our  
429 species-specific RAD data sets contained 16,260 SNPs from 175 *S. tanganyicae* samples and 28,500  
430 SNPs from 288 *L. miodon* samples. The data set for the combined species approach contained 35,966  
431 SNPs. Due to evidence for library effects (Fig. S1), we further removed 7,195 library-specific SNPs in

432 *S. tanganyicae* and 10,072 library-specific SNPs in *L. miodon*, resulting in final data sets of 9,065 SNPs  
433 for *S. tanganyicae* and 18,428 SNPs for *L. miodon*.

434

#### 435 *Evidence for distinct sex loci*

436 Principal component analysis revealed two distinct genetic clusters in each species (Fig. 2A). These  
437 clusters correspond to sexes identified through sexing of individuals by dissection (n = 14 *S.*  
438 *tanganyicae* and 45 *L. miodon* individuals; Fig. 2A and Table S1), and  $F_{ST}$  values indicated relatively  
439 large genetic differentiation between sexes in both species (Fig. 2B; male-female  $F_{ST} = 0.097$  for *S.*  
440 *tanganyicae*, Fig. 2C;  $F_{ST} = 0.035$  for *L. miodon*). Our phenotypic sexing of well-preserved, sexually  
441 mature specimens identified seven *S. tanganyicae* individuals as female and seven as male, with one  
442 individual identified phenotypically as male clustering with the other females genetically (Fig. 2A,  
443 Table S1). This individual was likely an immature female. In *L. miodon*, we identified 27 individuals  
444 phenotypically as females and 18 as males, all of which were consistent with genetic groups (Fig. 2A,  
445 Table S1).

446 In a DAPC to identify the loci underlying the strong genetic differentiation of the sexes for *S.*  
447 *tanganyicae*, we selected a loadings cut off of 0.0015 on PC1 based on the null distribution of  
448 loadings, which resulted in a total of 502 (5.5%) significant SNPs distributed over 129 scaffolds with  
449 high loadings on sex differences (Fig. S6A). In *L. miodon*, we selected a cut-off of 0.00077 on PC1. This  
450 cut-off resulted in 308 (1.7%) SNPs across 86 scaffolds with high loadings on sex differences (Fig.  
451 S6B). All of these loci show an excess of homozygosity in females and an excess of heterozygosity in  
452 males (Fig. 2C and 2E), and no SNPs were significant in both species. In addition, the scaffolds on  
453 which these loci were located were non-overlapping between the species (Fig 2F). There were no  
454 systematic differences in read depth between males and females at sex-associated SNPs or across  
455 scaffolds containing sex-associated SNPs in either species (Fig. S5B). In addition, there was no  
456 systematic difference in mean read depth between species or sexes on scaffolds containing sex-

457 associated SNPs (Fig. S5C). The scaffolds containing these sex-associated SNPs span 237Mb of the  
458 reference genome for *S. tanganyicae* (43.0% of the reference assembly) and 76.6Mb in *L. miodon*  
459 (13.9% of the reference assembly).

460 To test if the sex-linked loci overlap between the species, we used the species-combined data set to  
461 perform DAPC between sexes for each species individually and identified loci with high loadings.

462 Using this approach, we identified 570 SNPs across 133 scaffolds in *S. tanganyicae* (loading > 0.0006)  
463 (Fig. S7A) and 334 SNPs across 91 scaffolds in *L. miodon* linked to sex (loading > 0.001) (Fig. S7B).

464 These two sets of loci were again completely non-overlapping, suggesting that the sex-linked loci are  
465 unique in each species. In addition, the scaffolds on which these loci were located were again non-  
466 overlapping between the species (Fig. S7A and S7B). When examining *S. tanganyicae* sex-linked SNPs  
467 in *L. miodon* individuals, only 2.5% are polymorphic, and only 0.8% of *L. miodon* sex-linked SNPs are  
468 polymorphic in *S. tanganyicae*. In addition, the sex loci for each species do not show the same  
469 patterns of heterozygosity in the other species (Fig. S8).

470

#### 471 *Evidence for a segregating inversion in L. miodon*

472 *L. miodon* from Lake Kivu are divergent from individuals in Lake Tanganyika, but this differentiation is  
473 weaker than that between the three groups observed within Lake Tanganyika (Fig. 3C, 4A). The *L.*  
474 *miodon* individuals from Lake Kivu form additional clusters that are distinct from, but parallel to, the  
475 Tanganyika clusters along the second and third PC axis (Fig. 3C, 4A). Within Lake Tanganyika, we  
476 found individuals of all three clusters at single sampling sites, and there is no clear geographic signal  
477 to these groups (Fig. 3C). DAPC analysis of the two most differentiated groups within Lake  
478 Tanganyika identified 91 SNPs across 27 scaffolds with high loadings contributing to group  
479 differences (> 0.00077; Fig. 4B, 4C and Fig. S9). Among these SNPs with high loadings, we found that  
480 two clusters of *L. miodon* individuals were predominantly homozygous for opposite alleles, while the  
481 third group consisted of heterozygotes at these loci (Fig. 4D). This suggests that the three distinct

482 genetic groups we observe result from a segregating inversion, with two of the groups representing  
483 homokaryotypes and the third a heterokaryotype for these SNPs (Fig 4D and S9).

484 With this suggestion of a segregating inversion within *L. miodon*, we tested for Hardy-Weinberg  
485 equilibrium among the three groups within Lake Kivu and Lake Tanganyika as a whole and among  
486 lake-basins groups (Fig 5). Lake Tanganyika as a whole and each of the basins were in HWE ( $\chi^2$ ,  $p >$   
487 0.05). However, the frequencies in Lake Kivu differed significantly from HWE ( $\chi^2$ ,  $p = 0.005$ ) (Fig. 5A  
488 and 5B). We additionally found that the proportions of all three karyotype groups differed  
489 significantly between Lake Kivu fish and the fish found in each of the north, Mahale (middle), and  
490 south basins in Lake Tanganyika (two-proportion z-test;  $p = 0.010$ ,  $p = 0.0052$ ,  $p << 0.001$ ) (Fig. 5B).  
491 This result seems to be driven by a much higher frequency of genotype group 3 in Lake Kivu samples  
492 than was found in Lake Tanganyika (Fig. 5B). The only significant difference between the three basins  
493 within Lake Tanganyika was that the northern basin had a higher frequency of fish with genotype  
494 group 3 than either the Mahale or southern basins (two-proportion z-test;  $p = 0.030$ , others  $p > 0.3$ )  
495 (Fig. 5B).

496

#### 497 *Linkage disequilibrium among identified loci*

498 The distribution of pairwise linkage disequilibrium values among loci in the species-specific data sets  
499 were highly right-skewed, with the majority of locus pairs having low to no linkage (overall mean  $R^2 =$   
500 0.007; Fig. 6). In contrast, the subsets of loci identified as sex-linked in the species-specific data sets  
501 for *S. tanganyicae* and *L. miodon* had mean pairwise LD values of  $R^2 = 0.823$  and  $0.767$ , respectively  
502 (Fig. 6), suggesting that these sets of loci are much more tightly linked than expected based on the  
503 distribution of  $R^2$  values for all loci (Mann-Whitney test; *S. tanganyicae*  $W = 2060242276$ ,  $p << 0.001$ ;  
504 *L. miodon*  $W = 2954133944$ ,  $p << 0.001$ ). In *L. miodon*, the inversion group-delineating loci had a  
505 mean pairwise LD of  $R^2 = 0.227$ , suggesting that they are also more tightly linked than expected for

506 loci randomly placed in the genome (Mann-Whitney test,  $W = 682260000000$ ,  $p \ll 0.001$ ; Fig 4E), but  
507 less tightly linked than the sex-linked loci (Mann-Whitney test,  $W = 10328070$ ,  $p \ll 0.001$ ).

508

509 *No evidence for isolation-by-distance*

510 Sampling sites throughout the study generally had similar levels of genetic diversity ( $\Theta_w$ ) for both  
511 species (Table 2, Table 3). Within *S. tanganyicae*, we found only weak evidence for additional genetic  
512 structure beyond the genetic structure linked to sex (Fig. 3B). In contrast, we find very strong genetic  
513 structure within each sex in *L. miodon* (Fig. 3C), suggesting the existence of three distinct genetic  
514 groups of *L. miodon* in Lake Tanganyika. However, these three groups do not correspond to  
515 geographic localities.

516 In order to examine genetic structure not associated with sex-linked and inversion-linked loci, we  
517 removed scaffolds carrying those prior to further analyses. After removing loci associated with sex (in  
518 *S. tanganyicae*), and those associated with sex and the inversion (in *L. miodon*), 7,235 SNPs remained  
519 in the data set for *S. tanganyicae* and 17,432 SNPs in the *L. miodon* data set, which were used for  
520 spatial structure analyses. We first examined isolation-by-distance patterns with these data sets in  
521 both species. While  $F_{ST}$  values suggest a weak increase in genetic differentiation with increasing  
522 geographic distance (Table 2, Table 3, Fig. 3A), Mantel tests of  $F_{ST}$  vs. geographic distance between  
523 sampling sites indicated that this association is not significant (*S. tanganyicae*,  $p$ -value = 0.74; *L.*  
524 *miodon*,  $p$ -value = 0.83). The majority of 95% confidence intervals for pairwise  $F_{ST}$  estimates  
525 overlapped with 0 in *S. tanganyicae* and several overlapped 0 in *L. miodon* (Fig. S10). All  $F_{ST}$  estimates  
526 between basins were small ( $<0.001$ ), but significantly greater than zero in one out of three  
527 comparisons in *L. miodon* and two out of three comparisons in *S. tanganyicae* (Fig. S10).

528 We next conducted analyses of genetic structure using entropy. In both species, the most probable  
529 number of genetic groups identified in entropy was  $K=1$  (Fig. S11). In *L. miodon*, the grouping at  $K=2$   
530 separated fish from Lake Kivu from those in Lake Tanganyika. Although we did not detect additional

531 clear clustering in either of the species when using PCA, running entropy at  $K > 1$  for *S. tanganyicae*  
532 and  $K > 2$  for *L. miodon* identified distinct, albeit not strongly differentiated groups (Fig. S12 and S13).  
533 At  $K = 2$  and  $K = 3$  in *S. tanganyicae*, multiple genetic groups were present at all sampling sites, but  
534 mean group membership for each group differed significantly among sampling sites with more than 2  
535 individuals (one-way ANOVA,  $F(10,164)$ , all  $p < 0.001$ ; Fig. S14). In *L. miodon*, all groups at  $K = 3$  and  $K$   
536  $= 4$  were present at all sampling sites, except for the Kivu-specific group (Fig. S15). The non-Kivu  
537 groups differed significantly in frequency among Tanganyika sampling sites with more than 2  
538 individuals (one-way ANOVA,  $F(7,242)$ , all  $p < 0.01$ ; Fig. S14). The Reich  $F_{ST}$  estimates for all pairwise  
539 comparisons between groups were small but significant in *S. tanganyicae* ( $K=2$ , mean  $F_{ST} = 0.0016$ ;  $K=3$   
540 mean  $F_{ST} = 0.0024$ ; Fig. S16A) and *L. miodon* ( $K=3$  mean non-Kivu  $F_{ST} = 0.00076$ ;  $K=4$  mean non-Kivu  
541  $F_{ST} = 0.0012$ ; Fig. S16B).

542

## 543 Discussion

544 Little to no spatial genetic structuring is a relatively common observation in pelagic fish species with  
545 continuous habitats (e.g. Canales-Aguirre *et al.* 2016; Hutchinson *et al.* 2001; Momigliano *et al.*  
546 2017). However, many studies show that pelagic fish species harbour genetic structure that does not  
547 correspond with geographic distance, but instead correlates with ecological adaptation (Berg *et al.*  
548 2017; Kirubakaran *et al.* 2016; Martinez Barrio *et al.* 2016; Pettersson *et al.* 2019) or with cryptic  
549 species structure (Doenz *et al.* 2018). We present here the largest genomic data sets analysed for the  
550 two freshwater sardines of Lake Tanganyika to date.

551 We find evidence for the existence of many sex-linked SNPs in both *S. tanganyicae* and *L. miodon*,  
552 including strong deviations from expected heterozygosity at these loci, suggesting an XY sex  
553 determination system with males being the heterogametic sex (Fig. 2). In *L. miodon*, we additionally  
554 find three cryptic genetic groups, and patterns in heterozygosity indicate the presence of a  
555 segregating chromosomal inversion underlying this genetic structure (Fig. 4 and Fig. S9). All three

556 inversion genotypes (homokaryotypes and heterokaryotype) appear in *L. miodon* from both Lake  
557 Tanganyika and Lake Kivu, but relative frequencies of the karyotypes differ among these populations  
558 and among regions within Lake Tanganyika (Fig. 5). After removing sex-linked variation and inversion-  
559 linked variation, we find no evidence for isolation by distance in *S. tanganyicae* or *L. miodon* of Lake  
560 Tanganyika, despite the immense size of this lake and extensive geographic sampling of populations  
561 of both species. In both species we do find weak genetic structure, with the relative abundance of  
562 intraspecific genetic clusters varying between sampling sites.

563

#### 564 *Evidence for rapidly evolving genetic XY sex determination in both species*

565 Our results suggest that sex-linked regions of the genome in both *S. tanganyicae* and *L. miodon* are  
566 large and highly differentiated between males and females (Fig. 2). Despite being located across  
567 many scaffolds in our reference genome, these loci are in strong linkage disequilibrium in both  
568 species, compared to loci not involved in sex determination (Fig. 6). According to the canonical model  
569 of sex chromosome evolution, development of sex chromosomes initiates with the appearance of a  
570 sex-determining allele in the vicinity of alternative alleles only favourable for one of the sexes.  
571 Mechanisms reducing recombination, such as inversions that capture the sexually antagonistic locus  
572 and the novel sex-determining locus, support the spread of the sex-determining allele in combination  
573 with the sexually antagonistic region. Eventually neighboring regions also reduce recombination rate  
574 and further mutations accumulate, leading to the formation of a new sex chromosome (Bachtrog  
575 2013; Charlesworth *et al.* 2005; Gammerdinger & Kocher 2018; Wright *et al.* 2016). Examples range  
576 from ancient, highly heteromorphic sex chromosomes, to recent neo-sex chromosomes, which are  
577 found in mammals (Cortez *et al.* 2014), birds (Graves 2014), and fishes (Feulner *et al.* 2018;  
578 Gammerdinger *et al.* 2018; Gammerdinger & Kocher 2018; Kitano & Peichel 2012; Pennell *et al.*  
579 2015; Roberts *et al.* 2009; Ross *et al.* 2009; Yoshida *et al.* 2014). The high number of loci implicated in  
580 genetic sex differences in our study, and strong linkage disequilibrium among those loci, in addition  
581 to clear patterns of excess heterozygosity in males and homozygosity in females, gives strong

582 indication of the existence of large sex-determining regions in *S. tanganyicae* and *L. miodon*, which  
583 may lie on sex chromosomes that are distinct for each of the two species.

584 However, the structural arrangement of these loci remains unclear with our current reference  
585 genome. The scaffolds containing sex loci in *L. miodon* total to 76.6Mb, or 13.9% of the reference  
586 genome. In contrast, the scaffolds containing sex loci in *S. tanganyicae* total 237Mb, which sum to  
587 43% of the reference genome. This suggests that the *S. tanganyicae* sex chromosomes are not  
588 assembling well to the *L. miodon* genome – rather, they are assembling to many scaffolds to which  
589 they do not actually belong. This would be expected if there is little synteny between the sex  
590 chromosomes of these species despite their close evolutionary relationship and the nearly equivalent  
591 mapping rate of reads from each species to the *L. miodon* genome. It is worth noting that the  
592 assembly of sex chromosomes remains challenging due to the haploid nature of sex chromosomes  
593 (thus reducing sequencing depth at these regions) and existence of ampliconic and repetitive regions  
594 and a high amount of heterochromatin (Tomaszkiewicz *et al.* 2017). Such challenges with assembling  
595 sex chromosomes may lead to many scaffolds being implicated in sex determination in initial  
596 attempts at assembly, even when these scaffolds do all belong to one chromosome.

597 Despite large differences in heterozygosity between males and females at sex-associated loci, we did  
598 not find systematic differences between males and females in read depth at these loci. If males are  
599 the heterogametic sex and the sex chromosomes are strongly differentiated (i.e. the Y chromosome  
600 does not assemble to the X chromosome), we would expect males to have half as many reads at sex  
601 loci when compared to females. Thus, we expect that some or many Y-chromosome loci are  
602 assembling to the X-chromosome in our data set. This further supports the hypothesis that both  
603 species likely have young sex chromosomes, where X and Y are not so divergent as to no longer  
604 assemble to each other. However, it is difficult to know how much of the Y-chromosome we may be  
605 missing in our assembly. In total, we found 502 sex-linked SNPs in *S. tanganyicae* and 308 in *L.*  
606 *miodon*. If we relax our SNP filtering thresholds to allow for 80% missing data per site (instead of only  
607 50%), we find an additional 89 SNPs in *S. tanganyicae* and 82 SNPs in *L. miodon* that have reads in



608 male fish, but not in females. Some of these sites are located on the same scaffolds already  
609 implicated in sex, and others are on scaffolds not yet implicated in sex. These sites likely represent Y  
610 chromosome loci that did not assemble well in the reference genome.

611 We also show that the sets of SNPs linked to sex in *S. tanganyicae* and *L. miodon* are entirely distinct  
612 from one another, representing strong evidence for rapid evolution in these sex-linked regions (Fig.  
613 2F and S8). Furthermore, since the sex-determining regions in the two species do not appear to be  
614 co-located within the same region of the genome, this is evidence that the location of the sex-  
615 determining region has shifted. This means that if the common ancestor of these species had a sex-  
616 determining region, there appears to have been turnover of sex determining regions in one or both  
617 species during the approximately eight million years (95% reliability interval: 2.1–15.9 MYA) since  
618 these species diverged (Wilson *et al.* 2008). Rapid turnover of sex chromosomes in closely related  
619 species are known from a diversity of taxa (e.g. (Jeffries *et al.* 2018; Kitano & Peichel 2012; Ross *et al.*  
620 2009; Tennessen *et al.* 2018). The proposed mechanisms leading to such rapid turnover rates are  
621 chromosomal fusions of an autosome with an already existing sex chromosome, forming a “neo sex  
622 chromosome” (Kitano & Peichel 2012; Ross *et al.* 2009) or the translocation of sex loci from one  
623 chromosome to another (Tennessen *et al.* 2018). Understanding the mechanisms responsible for the  
624 high turnover rate of the sex chromosomes in the Tanganyikan freshwater sardines is a fascinating  
625 area for future research.

626 Furthermore, it will be important for future work to investigate if the strong differentiation between  
627 the sexes might also be associated with ecological differences between the sexes. Ecological  
628 polymorphism among sexes is known in fishes (Culumber & Tobler 2017; Laporte *et al.* 2018; Parker  
629 1992) and can be ecologically as important as differences between species (Start & De Lisle 2018).

630 It is worth noting that the strong sex-linked genetic differentiation in *L. miodon* and *S. tanganyicae*  
631 could have been mistaken for population structure had we filtered our data for excess heterozygosity  
632 without first examining it, and had we not been able to carefully phenotypically sex well-preserved,  
633 reproductively mature individuals of both species to confirm that the two groups in each species do

634 indeed correspond to sex (Table S1, Fig. 2A). Because of the strong deviations from expected  
635 heterozygosity at sex-linked loci, any filtering for heterozygosity would remove these loci from the  
636 data set. We believe this may explain why one previous study in *S. tanganycae* using RAD data (De  
637 Keyser *et al.* 2019) did not clearly identify this pattern despite its prevalence in the genome. For  
638 organisms with unknown sex determination systems, and for whom sex is not readily identifiable  
639 from phenotype, there is danger in conflating biased sampling of the sexes in different populations  
640 with population structure in genomic data sets (e.g. Benestan *et al.* 2017). This underscores the  
641 importance of sexing sampled individuals whenever possible when analyzing large genomic data sets,  
642 and to account for sex in downstream analyses of population or species structure. In our study, the  
643 phenotypic and genetic sex were in agreement in all individuals except one *S. tanganycae* individual  
644 (Table S1, sample 138863.IKO02). This fish was phenotypically identified as a male but genetically  
645 clustered with female individuals, suggesting that this individual was possibly not yet fully mature,  
646 and therefore was misidentified phenotypically.

647

#### 648 *Evidence for a chromosomal inversion in sympatric L. miodon*

649 Our results reveal the existence of three distinct genetic groups of *L. miodon*. Intriguingly, we find all  
650 three of these groups together within the same sampling sites, and even within the same single  
651 school of juvenile fishes (Fig. S17). Given patterns of heterozygosity at loci that have high loadings for  
652 distinguishing among the genetic clusters (Fig. 4D) together with the strong linkage disequilibrium  
653 (Fig. 4E), this structure is consistent with a chromosomal inversion. Chromosomal inversions, first  
654 described by Sturtevant (1921), reduce recombination in the inverted region because of the  
655 prevention or reduction of crossover in heterogametic individuals (Cooper 1945; Kirkpatrick 2010;  
656 Wellenreuther & Bernatchez 2018). Mutations in these chromosomal regions can therefore  
657 accumulate independently between the inverted and non-inverted haplotype. Although early work  
658 on chromosomal inversions in *Drosophila* has a rich history in evolutionary biology (Kirkpatrick 2010),  
659 new genomic sequencing technologies have recently led to inverted regions being detected in many

660 wild species (e.g. Berg *et al.* 2017; Christmas *et al.* 2018; Kirubakaran *et al.* 2016; Lindtke *et al.* 2017;  
661 Zinzow-Kramer *et al.* 2015), with implications for the evolution of populations with distinct inversion  
662 haplotypes. In *L. miodon*, the strong genetic divergence between the two inversion haplotypes (Fig.  
663 3C, 4A, 4B and 4C) is consistent with this pattern, and indeed the substantial independent evolution  
664 of these haplotypes is how the inversion is readily apparent even in a RAD data set. The divergence  
665 of the haplotypes, and the high frequency of both of these haplotypes, indicates that this inversion  
666 likely did not appear recently, although its apparent absence in *S. tanganyicae* indicates it has arisen  
667 since the divergence of these sister taxa around 8 million years ago (95% reliability interval: 2.1–15.9  
668 MYA; Wilson *et al.* 2008).

669 Two issues are of interest given the presence of this chromosomal inversion: first, whether selection  
670 was involved in its rise to current frequencies, and second, what evolutionary processes are  
671 influencing the current genotype frequencies within populations and the differences in frequencies  
672 among populations. Given that both inversion haplotypes appear in relatively high frequencies, it  
673 seems unlikely that drift alone could explain the rise of the initially rare derived inversion haplotype  
674 to its current frequency in the *L. miodon* population. We expect that *L. miodon* have sustained large  
675 effective population sizes through much of their evolutionary history since their split with *S.*  
676 *tanganyicae*, implying that drift would have been a continually weak force. Although selection against  
677 inversions might occur due to an inversion's disruption of meiosis or gene expression due to the  
678 position of the breakpoints (Kirkpatrick 2010), positive selection may also act on inversions when  
679 they carry alleles that themselves are under positive selection. Due to the reduced recombination  
680 rates in inversions, these regions of the genome provide opportunities for local or ecological  
681 adaptation despite ongoing gene flow or complete random mating (Kirkpatrick & Barton 2006).  
682 Although it is unclear given current data whether the inversion that we describe here in *L. miodon* is  
683 tied to differential ecological adaptation, this is an important area for future investigation.

684 Evolutionary pressures on the derived inversion haplotype since its origin may differ from pressures  
685 currently acting on either haplotype. When we examine frequencies of the inversion karyotypes

686 pooled across all sampled populations in Lake Tanganyika, the observed frequencies do not differ  
687 from Hardy-Weinberg expectations (chi-square = 3.51; p-value = 0.06); this is additionally true within  
688 each of the sub-basins within Lake Tanganyika (Fig. 5). However, the Lake Kivu population does show  
689 deviation from HWE (chi-square = 7.74; p-value = 0.005). Furthermore, frequencies of the inversion  
690 karyotypes differ among populations: the proportions of all three karyotypes differ significantly  
691 between Lake Kivu and Lake Tanganyika populations, and within Lake Tanganyika, one of the  
692 homokaryotypes (Group 3 in Fig. 5), has a higher frequency in the northern basin than in the middle  
693 or southern basins (Fig. 5). In Lake Tanganyika, the southern and northern basins differ substantially  
694 in nutrient abundance and limnological dynamics, and the Mahale Mountain (middle) region  
695 represents the geographical transition between the two basins (Bergamino *et al.* 2010; Kraemer *et al.*  
696 2015; Plisnier *et al.* 1999; Plisnier *et al.* 2009). Thus, it is plausible that differential ecological selection  
697 could be driving differences in the frequencies on the inversion karyotypes spatially within the lake,  
698 explaining the differences in frequencies we observe among these extant populations. Genetic drift is  
699 another possibility to explain the spatial differences in frequencies, and although this is plausible in  
700 explaining the frequency differences between Lake Tanganyika and Lake Kivu, it seems a less likely  
701 explanation within Lake Tanganyika because of the lack of spatial genetic structure among  
702 populations within the lake (Fig. 3A and 3C). Greater understanding of the ecology of these fishes in  
703 the north and the south of Lake Tanganyika, and assessment of the genes within the inverted region,  
704 is needed to clarify this question.

705

#### 706 *Comparing L. miodon populations in Lake Tanganyika to that introduced to Lake Kivu*

707 We found small, but significant divergence between all sub-basin populations of *L. miodon* in Lake  
708 Tanganyika compared to the Lake Kivu population (Table 3). In contrast, we found very substantial  
709 differences in inversion haplotype frequencies between *L. miodon* in their native Lake Tanganyika  
710 and the introduced population in Lake Kivu. This difference in inversion haplotype frequencies could  
711 derive from founder effects, from drift within this population since their introduction in the absence

712 of gene flow with the Lake Tanganyika population, or from selection in the Lake Kivu population since  
713 their introduction to this substantially different lake environment. We identified individuals in Lake  
714 Kivu with all three inversion genotypes that were detected in Lake Tanganyikan fish, suggesting that  
715 the inversion is also segregating in Lake Kivu, and that the founding individuals harboured this  
716 polymorphism. The difference in haplotype frequencies between Lake Kivu and Lake Tanganyika may  
717 have two distinct but not mutually exclusive causes. First, the strong difference in the frequencies of  
718 the inversion haplotypes compared to Lake Tanganyika populations may exist due to founder effects.  
719 *L. miodon* were introduced to Lake Kivu in the 1950s (Hauser et al. 1995), and all introduced fish  
720 were brought from the northern part of Lake Tanganyika. The homokaryotype represented as group  
721 3 in our analyses is the prevalent karyotype in Lake Kivu, and this karyotype also appears in highest  
722 frequencies in our samples from northern Lake Tanganyika sites (Fig. 5). Thus, it is plausible that  
723 founder effects could have led to the increased frequency of this karyotype within the Lake Kivu  
724 population. Second, selection could have contributed to the differences in haplotype frequency  
725 between Lake Kivu and Lake Tanganyika. This could either be positive selection for the more  
726 common Kivu haplotype, or negative selection against the rarer karyotype caused by low fitness of  
727 heterozygotes. For the latter, one possible cause for low heterozygote fitness is disruption in meiosis  
728 caused by the inversion, a common scenario for inversions (Kirkpatrick 2010; Kirkpatrick & Barton  
729 2006; Wellenreuther & Bernatchez 2018). However, invoking this mechanism would require  
730 understanding why selection due to meiotic dysfunction has not removed the inversion  
731 polymorphism in Lake Tanganyika. One possibility would be positive ecological selection on both  
732 homokaryotypes in Lake Tanganyika that outweighs selection against heterozygotes due to weak  
733 meiotic dysfunction; if this ecological selection were released upon introduction to Lake Kivu,  
734 selection would then shift entirely to selection against heterozygotes, and would act to decrease the  
735 frequency of the less common inversion type. However, this remains speculation and these scenarios  
736 need to be examined with additional data.

737 The current frequency of the inversion karyotypes in Lake Kivu also strongly deviates from Hardy-  
738 Weinberg expectations with high frequencies of only one homokaryotype and fewer than expected  
739 heterozygotes (Chi-square =7.74; p-value =0.005). This suggests that there are violations to the  
740 assumptions of HWE currently operating in the Lake Kivu population. Given that our samples were  
741 collected from a geographically proximate location within Lake Kivu and thus are not likely to  
742 represent sampling across subpopulations, and given the large population sizes in this lake, we view  
743 the most likely violations to be either non-random mating in the Kivu population or selection. As  
744 discussed above related to the Lake Kivu haplotype frequencies compared to Lake Tanganyika, the  
745 high frequency of the homokaryotype represented as group 3 in our Lake Kivu sample compared to  
746 Lake Tanganyika populations may indicate ongoing positive selection for this haplotype or negative  
747 selection against the rarer karyotype caused by low fitness of heterozygotes.

748 In summary, it is likely that the strong shift in genotype frequencies compared to Lake Tanganyika  
749 populations and the current deviation from HWE in the Lake Kivu sample is the result of first, founder  
750 effects leading to a higher frequency of karyotype 3 in Lake Kivu compared to Lake Tanganyika and  
751 second, of selection or non-random mating continuing to distort expected genotype frequencies.  
752 Future studies should examine these possibilities more explicitly with a larger sample of individuals  
753 from Lake Kivu.

754

#### 755 *No isolation-by-distance but weak population structure*

756 For both *L. miodon* and *S. tanganyicae*, excluding sex-associated and inversion-associated variation,  
757 we find no significant isolation-by-distance when examining the relationship between pairwise  
758 genetic differentiation and geographic distance between populations within Lake Tanganyika (Fig.  
759 3a). Pairwise  $F_{st}$ s between sub-basins of Lake Tanganyika are significantly different from zero in two  
760 out of three comparisons for *S. tanganyicae* and one out of three comparisons for *L. miodon*,  
761 however, all values are very small (<0.001; Figure S10). Using entropy to assess genetic structure,

762 analyses for both species support a single genetic group as the most optimal grouping (K=1; Fig. S6).  
763 For *L. miodon*, K=2 subdivides the Lake Kivu population from the Lake Tanganyika population. Further  
764 examination of results at higher levels of K in both species reveals additional genetic clusters that are  
765 composed of sets of individuals (Fig. S12, S13), rather than dividing individuals between clusters, as  
766 would be expected if the population were truly panmictic. We interpret this result as implying  
767 additional genetic groups in the data which may share allele frequency differences due to selection  
768 or drift, or share minor genomic structural variation. Although the groups entropy finds at these  
769 values of K do have significant  $F_{ST}$ s (Fig. S16), their values are small ( $\leq 0.015$ ) and the groups are not  
770 apparent from PCA, suggesting the effect is due to relatively few small regions in the genome.  
771 Because all these groups are distributed across the lake but vary in proportional representation  
772 between locations (Fig. S14, S15), it is possible that they differ in allele frequencies due to selection,  
773 drift or smaller structural variants.

774

## 775 *Conclusions*

776 Genomic data from *S. tanganyicae* and *L. miodon* reveal an interesting array of unexpected patterns in  
777 chromosomal evolution. Modern fisheries management seeks to identify locally adapted or  
778 otherwise demographically independent units. We do not find significant isolation-by-distance within  
779 these two freshwater sardine species from Lake Tanganyika. The strong genetic structure we find is  
780 all in sympatry, namely as genetic divergence between the sexes and evidence of a segregating  
781 inversion in *L. miodon*. Additionally, we find evidence of weakly differentiated genetic clusters with  
782 lake-wide distributions in entropy analyses. From a management perspective, further research  
783 should focus on the potential for adaptive differences between the inversion genotypes in *L. miodon*  
784 as well as identifying the causes of the additional subtle non-geographical genetic population  
785 structure that we found in both species. This study system furthermore offers high potential for  
786 further eco-evolutionary study by focusing on the potential for adaptive differences between the  
787 sexes in both sardines. All such work will contribute to better understanding the role that these key

788 components of the pelagic community assume in the ecosystem of this lake, which provides  
789 important resources to millions of people living at its shores.

790

## 791 **Acknowledgements**

792 This work was funded by the Swiss National Science Foundation (grant CR23I2-166589), a grant from  
793 The Nature Conservancy to CEW and PBM, and start-up funding from the University of Wyoming to  
794 CEW. CEW was partially supported by NSF grant DEB-1556963. Computing was accomplished with an  
795 allocation from the University of Wyoming's Advanced Research Computing Center, on its Teton Intel  
796 x86\_64 cluster (<https://doi.org/10.15786/M2FY47>) and the Genetic Diversity Center (GDC) of ETH  
797 Zürich. Special thanks go to Mupape Mukuli for facilitating logistics during fieldwork and to the crew  
798 of the MV Maman Benita for fieldwork assistance. We thank the whole team at the Tanzanian  
799 Fisheries Research Institute for their support. A special thanks goes to Mary Kishe for her support  
800 during fieldwork permission processes and to the Tanzanian Commission for Science and Technology  
801 (COSTECH) for their support of this project through permits allowing us to do research in Tanzania.  
802 Thanks to Mark Kirkpatrick and his lab group for enlightening discussion regarding the interpretation  
803 of these data, to the Wagner lab at the University of Wyoming, and to the FishEc group at EAWAG,  
804 especially Kotaro Kagawa and Oliver Selz, for helpful discussion. This manuscript was significantly  
805 improved by comments from Erica Larson and three anonymous reviewers.

806

## 807 **References**

808

- 809 Andrews S (2010) FASTQC. A quality control tool for high throughput sequence data.  
810 Bachtrog D (2013) Y-chromosome evolution: emerging insights into processes of Y-chromosome  
811 degeneration. *Nat Rev Genet* **14**, 113-124.  
812 Baird NA, Etter PD, Atwood TS, *et al.* (2008) Rapid SNP discovery and genetic mapping using  
813 sequenced RAD markers. *PLoS One* **3**.  
814 Belgrano A, Fowler CW (2011) *Ecosystem-based management for Marine Fisheries: An evolving*  
815 *perspective*.  
816 Benestan L, Moore JS, Sutherland BJB, *et al.* (2017) Sex matters in massive parallel sequencing:  
817 Evidence for biases in genetic parameter estimation and investigation of sex determination  
818 systems. *Mol Ecol* **26**, 6767-6783.  
819 Berg PR, Star B, Pampoulie C, *et al.* (2017) Trans-oceanic genomic divergence of Atlantic cod ecotypes  
820 is associated with large inversions. *Heredity (Edinb)* **119**, 418-428.  
821 Bergamino N, Horion S, Stenuite S, *et al.* (2010) Spatio-temporal dynamics of phytoplankton and  
822 primary production in Lake Tanganyika using a MODIS based bio-optical time series. *Remote*  
823 *Sensing of Environment* **114**, 772-780.  
824 Botsford LW, Castilla JC, Peterson CH (1997) The Management of Fisheries and Marine Ecosystems.  
825 *Science* **277**, 509-515.  
826 Canales-Aguirre CB, Ferrada-Fuentes S, Galleguillos R, Hernandez CE (2016) Genetic Structure in a  
827 Small Pelagic Fish Coincides with a Marine Protected Area: Seascape Genetics in Patagonian  
828 Fjords. *PLoS One* **11**, e0160670.  
829 Chapman DW, van Well P (1978) Growth and Mortality of *Stolothrissa tanganicae*. *Transactions of*  
830 *the American Fisheries Society* **107**, 26-35.  
831 Charlesworth D, Charlesworth B, Marais G (2005) Steps in the evolution of heteromorphic sex  
832 chromosomes. *Heredity* **95**, 118-128.



- 833 Catchen J, Hohenlohe PA, Bassham S, Amores A, Cresko WA (2013) Stacks: an analysis tool set for  
834 population genomics. *Mol Ecol* **22**, 3124-3140.
- 835 Christmas MJ, Wallberg A, Bunikis I, *et al.* (2018) Chromosomal inversions associated with  
836 environmental adaptation in honeybees. *Mol Ecol*.
- 837 Cohen AS, Gergurich EL, Kraemer BM, *et al.* (2016) Climate warming reduces fish production and  
838 benthic habitat in Lake Tanganyika, one of the most biodiverse freshwater ecosystems. *Proc*  
839 *Natl Acad Sci U S A* **113**, 9563-9568.
- 840 Cohen AS, Soreghan MJ, Scholz CA (1993) Estimating the age of formation of lakes: an example from  
841 Lake Tanganyika, East African Rift system. *Geology* **21**, 511-514.
- 842 Collart A (1960) L'introduction du *Stolothrissa tanganyicae* (Ndagala) au Lac Kivu. *Bulletin Agricole du*  
843 *Congo Belge*, 975-985.
- 844 Collart A (1989) Introduction et acclimatation de l'isambaza au Lac Kivu. Seminaire "Trente ans apres  
845 l'introduction l'isambaza au Lac Kivu ". In: *FAO Report*, Gisenyi.
- 846 Connallon T, Olito C, Dutoit L, *et al.* (2018) Local adaptation and the evolution of inversions on sex  
847 chromosomes and autosomes. *Philos Trans R Soc Lond B Biol Sci* **373**.
- 848 Cooper KW (1945) NORMAL SEGREGATION WITHOUT CHIASMATA IN FEMALE *DROSOPHILA*  
849 *MELANOGASTER* *Genetics* **30**, 472-484.
- 850 Cortez D, Marin R, Toledo-Flores D, *et al.* (2014) Origins and functional evolution of Y chromosomes  
851 across mammals. *Nature* **508**, 488.
- 852 Coulter GW (1976) The biology of Lates species (Nile perch) in Lake Tanganyika, and the status of the  
853 pelagic fishery for Lates species and *Luciolates stappersii* (Blgr.). *Journal of Fish Biology* **9**,  
854 235-259.
- 855 Coulter GW (1991) *Lake Tanganyika and its Life* British Museum (Natural History) Cromwell Road,  
856 London SW7 5BD & Oxford University Press, Walton Street, Oxford OX2 6DP.
- 857 Culumber ZW, Tobler M (2017) Sex-specific evolution during the diversification of live-bearing fishes.  
858 *Nature Ecology & Evolution* **1**, 1185-1191.
- 859 Danecek P, Auton A, Abecasis G, *et al.* (2011) The variant call format and VCFtools. *Bioinformatics* **27**,  
860 2156-2158.
- 861 De Keyzer ELR, De Corte Z, Van Steenberge M, *et al.* (2019) First genomic study on Lake Tanganyika  
862 sprat *Stolothrissa tanganyicae*: a lack of population structure calls for integrated management  
863 of this important fisheries target species. *BMC Evol Biol* **19**, 6.
- 864 Doenz CJ, Bittner D, Vonlanthen P, Wagner CE, Seehausen O (2018) Rapid buildup of sympatric  
865 species diversity in Alpine whitefish. *Ecology and Evolution* **8**, 9398-9412.
- 866 Ellis CMA (1971) The size at maturity and breeding seasons of sardines in southern Lake Tanganyika.  
867 *African Journal of Tropical Hydrobiology and Fisheries* **1**, 59-66.
- 868 FAO (1995) Management of African inland fisheries for sustainable production. In: *First Pan African*  
869 *Fisheries Congress and Exhibition*. FAO Rome, UNEP, NAIROBI.
- 870 Feulner PGD, Schwarzer J, Haesler MP, Meier JI, Seehausen O (2018) A Dense Linkage Map of Lake  
871 Victoria Cichlids Improved the Pundamilia Genome Assembly and Revealed a Major QTL for  
872 Sex-Determination. *G3 (Bethesda)* **8**, 2411-2420.
- 873 Gammerdinger WJ, Conte MA, Sandkam BA, *et al.* (2018) Novel Sex Chromosomes in 3 Cichlid Fishes  
874 from Lake Tanganyika. *J Hered* **109**, 489-500.
- 875 Gammerdinger WJ, Kocher TD (2018) Unusual Diversity of Sex Chromosomes in African Cichlid Fishes.  
876 *Genes (Basel)* **9**.
- 877 Graves JAM (2014) Avian sex, sex chromosomes, and dosage compensation in the age of genomics.  
878 *Chromosome Research* **22**, 45-57.
- 879 Hauser L, Carvalho GR, Pitcher TJ (1995) Morphological and genetic differentiation of the African  
880 clupeid *Limnothrissa miodon* 34 years after introduction to Lake Kivu. *Journal of Fish Biology*  
881 **47**, 127-144.
- 882 Hauser L, Carvalho GR, Pitcher TJ (1998) Genetic population structure in the Lake Tanganyika sardine  
883 *Limnothrissa miodon*. *Journal of Fish Biology* **53**, 413-429.

- 884 Hooper DM, Price TD (2015) Rates of karyotypic evolution in Estrildid finches differ between island  
885 and continental clades. *Evolution* **69**, 890-903.
- 886 Hooper DM, Griffith SC, Price TD (2019) Sex chromosome inversions enforce reproductive isolation  
887 across an avian hybrid zone. *Mol Ecol* **28**, 1246-1262.
- 888 Hutchinson WF (2008) The dangers of ignoring stock complexity in fishery management: the case of  
889 the North Sea cod. *Biol Lett* **4**, 693-695.
- 890 Hutchinson WF, Carvalho GR, Rogers SI (2001) Marked genetic structuring in localised spawning  
891 populations of cod *Gadus morhua* in the North Sea and adjoining waters, as revealed by  
892 microsatellites. *Marine Ecology Progress Series* **223**, 251-269.
- 893 Jeffries DL, Lavanchy G, Sermier R, *et al.* (2018) A rapid rate of sex-chromosome turnover and non-  
894 random transitions in true frogs. *Nat Commun* **9**, 4088.
- 895 Jombart T (2008) adegenet: a R package for the multivariate analysis of genetic markers.  
896 *Bioinformatics* **24**, 1403-1405.
- 897 Jombart T, Devillard S, Balloux F (2010) Discriminant analysis of principal components: a new method  
898 for the analysis of genetically structured populations. *BMC Genetics* **11**, 94.
- 899 Jones FC, Grabherr MG, Chan YF, *et al.* (2012) The genomic basis of adaptive evolution in threespine  
900 sticklebacks. *Nature* **484**, 55-61.
- 901 Kimirei IA, Mgaya YD, Chande AI (2008) Changes in species composition and abundance of  
902 commercially important pelagic fish species in Kigoma area, Lake Tanganyika, Tanzania.  
903 *Aquatic Ecosystem Health and Management* **11**, 29-35.
- 904 Kirkpatrick M (2010) How and Why Chromosome Inversions Evolve. *PLoS Biology* **8**, e1000501.
- 905 Kirkpatrick M, Barton N (2006) Chromosome inversions, local adaptation and speciation. *Genetics*  
906 **173**, 419-434.
- 907 Kirubakaran TG, Andersen Ø, De Rosa MC, *et al.* (2019) Characterization of a male specific region  
908 containing a candidate sex determining gene in Atlantic cod. *Scientific Reports* **9**, 116-116.
- 909 Kirubakaran TG, Grove H, Kent MP, *et al.* (2016) Two adjacent inversions maintain genomic  
910 differentiation between migratory and stationary ecotypes of Atlantic cod. *Mol Ecol* **25**,  
911 2130-2143.
- 912 Kitano J, Peichel CL (2012) Turnover of sex chromosomes and speciation in fishes. *Environ Biol Fishes*  
913 **94**, 549-558.
- 914 Korneliussen TS, Albrechtsen A, Nielsen R (2014) ANGSD: Analysis of Next Generation Sequencing  
915 Data. *BMC Bioinformatics* **15**, 356.
- 916 Korneliussen TS, Moltke I, Albrechtsen A, Nielsen R (2013) Calculation of Tajima's D and other  
917 neutrality test statistics from low depth next-generation sequencing data. *BMC*  
918 *Bioinformatics* **14**, 289.
- 919 Kraemer BM, Hook S, Huttula T, *et al.* (2015) Century-Long Warming Trends in the Upper Water  
920 Column of Lake Tanganyika. *PLoS One* **10**, e0132490.
- 921 Kurki H, Mannini P, Vuorinen I, *et al.* (1999) Macrozooplankton communities in Lake Tanganyika  
922 indicate food chain differences between the northern part and the main basins.  
923 *Hydrobiologia* **407**, 123-129.
- 924 Kuusipalo L (1999) Genetic variation in the populations of pelagic clupeids *Stolothrissa tanganyicae*  
925 and *Limnothrissa miodon* and Nile perch (*Lates stappersii*, *L. mariae*) in Lake Tanganyika.  
926 FAO/FINNIDA Research for the Management of the Fisheries of Lake Tanganyika., p. 28p.
- 927 Lamichhaney S, Fuentes-Pardo AP, Rafati N, *et al.* (2017) Parallel adaptive evolution of geographically  
928 distant herring populations on both sides of the North Atlantic Ocean. *Proceedings of the*  
929 *National Academy of Sciences* **114**, E3452-E3461.
- 930 Langmead B, Salzberg SL (2012) Fast gapped-read alignment with Bowtie 2. *Nat Methods* **9**, 357-359.
- 931 Laporte M, Berrebi P, Claude J, *et al.* (2018) The ecology of sexual dimorphism in size and shape of  
932 the freshwater blenny *Salaria fluviatilis*. *Curr Zool* **64**, 183-191.
- 933 Li H, Durbin R (2009) Fast and accurate short read alignment with Burrows-Wheeler transform.  
934 *Bioinformatics* **25**, 1754-1760.

- 935 Li H, Handsaker B, Wysoker A, *et al.* (2009) The Sequence Alignment/Map format and SAMtools.  
936 *Bioinformatics* **25**, 2078-2079.
- 937 Lindtke D, Lucek K, Soria-Carrasco V, *et al.* (2017) Long-term balancing selection on chromosomal  
938 variants associated with crypsis in a stick insect. *Mol Ecol* **26**, 6189-6205.
- 939 Loisel S, Cózar A, Adgo E, *et al.* (2014) Decadal Trends and Common Dynamics of the Bio-Optical  
940 and Thermal Characteristics of the African Great Lakes. *PLoS One* **9**, e93656.
- 941 Mannini P, Aro E, Katonda I, *et al.* (1996) Pelagic fish stocks of Lake Tanganyika: biology and  
942 exploitation. FAO/FINNIDA Research for the Management of the Fisheries of Lake  
943 Tanganyika. In: GCP/RAF/271/FIN—TD/53 (En), p. 60p.
- 944 Marques DA, Lucek K, Meier JI, *et al.* (2016) Genomics of Rapid Incipient Speciation in Sympatric  
945 Threespine Stickleback. *PLoS Genet* **12**, e1005887.
- 946 Martinez Barrio A, Lamichhaney S, Fan G, *et al.* (2016) The genetic basis for ecological adaptation of  
947 the Atlantic herring revealed by genome sequencing. *Elife* **5**.
- 948 Martinez PA, Zurano JP, Amado TF, *et al.* (2015) Chromosomal diversity in tropical reef fishes is  
949 related to body size and depth range. *Molecular Phylogenetics and Evolution* **93**, 1-4.
- 950 McGlue MM, Lezzar KE, Cohen AS, *et al.* (2007) Seismic records of late Pleistocene aridity in Lake  
951 Tanganyika, tropical East Africa. *Journal of Paleolimnology* **40**, 635-653.
- 952 Mikheenko A, Prjibelski A, Saveliev V, Antipov D, Gurevich A (2018) Versatile genome assembly  
953 evaluation with QUAST-LG. *Bioinformatics* **34**, i142-i150.
- 954 Mölsä H, Reynolds JE, Coenen EJ, Lindqvist OV (1999) Fisheries research towards resource  
955 management on Lake Tanganyika. *Hydrobiologia* **407**, 1-24.
- 956 Mölsä H, Sarvala J, Badende S, *et al.* (2002) Ecosystem monitoring in the development of sustainable  
957 fisheries in Lake Tanganyika. *Aquatic Ecosystem Health and Management* **5**, 267-281.
- 958 Momigliano P, Jokinen H, Fraimout A, *et al.* (2017) Extraordinarily rapid speciation in a marine fish.  
959 *Proceedings of the National Academy of Sciences* **114**, 6074-6079.
- 960 Mulimbwa N, Raeymaekers JAM, Sarvala J (2014a) Seasonal changes in the pelagic catch of two  
961 clupeid zooplanktivores in relation to the abundance of copepod zooplankton in the northern  
962 end of Lake Tanganyika. *Aquatic Ecosystem Health and Management* **17**, 25-33.
- 963 Mulimbwa N, Sarvala J, Raeymaekers JAM (2014b) Reproductive activities of two zooplanktivorous  
964 clupeid fish in relation to the seasonal abundance of copepod prey in the northern end of Lake  
965 Tanganyika. *Belgian Journal of Zoology* **144**, 77-92.
- 966 Natri HM, Merila J, Shikano T (2019) The evolution of sex determination associated with a  
967 chromosomal inversion. *Nat Commun* **10**, 145.
- 968 O'Reilly CM, Alin SR, Piisnier PD, Cohen AS, McKee BA (2003) Climate change decreases aquatic  
969 ecosystem productivity of Lake Tanganyika, Africa. *Nature* **424**, 766-768.
- 970 Parker GA (1992) The evolution of sexual size dimorphism in fish. *Journal of Fish Biology*, 1-20.
- 971 Pearce MJ (1985) A description and stock assessment of the pelagic fishery in the South-east arm of  
972 the Zambian waters of Lake Tanganyika. In: Report of the department of fisheries, Zambian  
973 pp. 1-74.
- 974 Pennell MW, Kirkpatrick M, Otto SP, *et al.* (2015) Y Fuse? Sex Chromosome Fusions in Fishes and  
975 Reptiles. *PLOS Genetics* **11**, e1005237.
- 976 Pettersson ME, Rochus CM, Han F, *et al.* (2019) A chromosome-level assembly of the Atlantic herring  
977 genome-detection of a supergene and other signals of selection. *Genome Research* **29**, 1919-  
978 1928.
- 979 Plisnier PD, Chitamwebwa D, Mwape L, *et al.* (1999) Limnological annual cycle inferred from physical-  
980 chemical fluctuations at three stations of Lake Tanganyika. *Hydrobiologia* **407**, 45-58.
- 981 Plisnier PD, Mgana H, Kimirei I, *et al.* (2009) Limnological variability and pelagic fish abundance  
982 (*Stolothrissa tanganyicae* and *Lates stappersii*) in Lake Tanganyika. *Hydrobiologia* **625**, 117-  
983 134.
- 984 Presgraves DC (2008) Sex chromosomes and speciation in Drosophila. *Trends in Genetics* **24**, 336-343.

- 985 Pritchard JK, Przeworski M (2001) Linkage Disequilibrium in Humans: Models and Data. *The American*  
986 *Journal of Human Genetics* **69**, 1-14.
- 987 Purcell S, Neale B, Todd-Brown K, *et al.* (2007) PLINK: A Tool Set for Whole-Genome Association and  
988 Population-Based Linkage Analyses. *The American Journal of Human Genetics* **81**, 559-575.
- 989 Qvarnstrom A, Bailey RI (2009) Speciation through evolution of sex-linked genes. *Heredity (Edinb)*  
990 **102**, 4-15.
- 991 Reich D, Thangaraj K, Patterson N, Price AL, Singh L (2009) Reconstructing Indian population history.  
992 *Nature* **461**, 489-494.
- 993 Roberts RB, Ser JR, Kocher TD (2009) Sexual Conflict Resolved by Invasion of a Novel Sex Determiner  
994 in Lake Malawi Cichlid Fishes. *Science* **326**, 998-1001.
- 995 Roesti M, Kueng B, Moser D, Berner D (2015) The genomics of ecological vicariance in threespine  
996 stickleback fish. *Nat Commun* **6**, 8767.
- 997 Ross JA, Urton JR, Boland J, Shapiro MD, Peichel CL (2009) Turnover of Sex Chromosomes in the  
998 Stickleback Fishes (Gasterosteidae). *PLOS Genetics* **5**, e1000391.
- 999 Sarvala J, Tarvainen M, Salonen K, Mölsä H (2002) Pelagic food web as the basis of fisheries in Lake  
1000 Tanganyika: A bioenergetic modeling analysis. *Aquatic Ecosystem Health and Management* **5**,  
1001 283-292.
- 1002 Spliethoff PC, de Longh HH, Frank VG (1983) Success of the Introduction of the Fresh Water Clupeid  
1003 *Limnothrissa miodon* (Boulenger) in Lake Kivu. *Aquaculture Research* **14**, 17-31.
- 1004 Start D, De Lisle S (2018) Sexual dimorphism in a top predator (*Notophthalmus viridescens*) drives  
1005 aquatic prey community assembly. *Proc Biol Sci* **285**.
- 1006 Sturtevant AH (1921) A Case of Rearrangement of Genes in Drosophila. *Genetics* **7**, 235-237.
- 1007 Tennessen JA, Wei N, Straub SCK, *et al.* (2018) Repeated translocation of a gene cassette drives sex-  
1008 chromosome turnover in strawberries. *PLoS Biol* **16**, e2006062.
- 1009 Tomaszewicz M, Medvedev P, Makova KD (2017) Y and W Chromosome Assemblies: Approaches  
1010 and Discoveries. *Trends Genet* **33**, 266-282.
- 1011 van der Knaap M (2013) Comparative analysis of fisheries restoration and public participation in Lake  
1012 Victoria and Lake Tanganyika. *Aquatic Ecosystem Health and Management* **16**, 279-287.
- 1013 Van der Knaap M, Katonda KI, De Graaf GJ (2014) Lake Tanganyika fisheries frame survey analysis:  
1014 Assessment of the options for management of the fisheries of Lake Tanganyika. *Aquatic*  
1015 *Ecosystem Health and Management* **17**, 4-13.
- 1016 van Zwieten PAM, Roest FC, Machiels MAM, Van Densen WLT (2002) Effects of inter-annual  
1017 variability, seasonality and persistence on the perception of long-term trends in catch rates  
1018 of the industrial pelagic purse-seine fishery of northern Lake Tanganyika (Burundi). *Fisheries*  
1019 *Research* **54**, 329-348.
- 1020 Verburg P, Antenucci JP, Hecky RE (2011) Differential cooling drives large-scale convective circulation  
1021 in Lake Tanganyika. *Limnology and Oceanography* **56**, 910-926.
- 1022 Verburg P, Hecky RE (2003) Wind patterns, evaporation, and related physical variables in Lake  
1023 Tanganyika, east Africa. *Journal of Great Lakes Research* **29**, 48-61.
- 1024 Verburg P, Hecky RE, Kling H (2003) Ecological consequences of a century of warming in Lake  
1025 Tanganyika. *Science* **301**, 505-507.
- 1026 Wellenreuther M, Bernatchez L (2018) Eco-Evolutionary Genomics of Chromosomal Inversions.  
1027 *Trends Ecol Evol* **33**, 427-440.
- 1028 Williams JGK, Kubelik AR, Livak KJ, Rafalski JA, Tingey SV (1990) DNA polymorphisms amplified by  
1029 arbitrary primers are useful as genetic markers. *Nucleic Acids Research* **18**, 6531- 6535.
- 1030 Wilson AB, Teugels GG, Meyer A (2008) Marine incursion: the freshwater herring of Lake Tanganyika  
1031 are the product of a marine invasion into West Africa. *PLoS One* **3**, e1979.
- 1032 Wright AE, Dean R, Zimmer F, Mank JE (2016) How to make a sex chromosome. *Nature*  
1033 *Communications* **7**, 12087.
- 1034 Yoshida K, Makino T, Yamaguchi K, *et al.* (2014) Sex Chromosome Turnover Contributes to Genomic  
1035 Divergence between Incipient Stickleback Species. *PLOS Genetics* **10**, e1004223.



1036 Zheng X, Levine D, Shen J, *et al.* (2012) A high-performance computing toolset for relatedness and  
1037 principal component analysis of SNP data. *Bioinformatics* **28**, 3326-3328.  
1038 Zinzow-Kramer WM, Horton BM, McKee CD, *et al.* (2015) Genes located in a chromosomal inversion  
1039 are correlated with territorial song in white-throated sparrows. *Genes Brain Behav* **14**, 641-  
1040 654.

1041  
1042

#### 1043 **Data Accessibility Statement**

1044 We will make our genetic data, including our reference genome, publicly available by submitting it to  
1045 the European Nucleotide Archive (ENA). We intend to submit as soon as possible but by the latest  
1046 after acceptance of the manuscript. All scripts used for sequence processing and analysis can be  
1047 found in our Github repository (<https://github.com/jessicarick/lake-tanganyika-sardines>).  
1048

1049

#### 1050 **Author contributions:**

1051 JJ: developing and writing SNSF grant, sampling and processing fish, identifying phenotypic sex of  
1052 fish, DNA extractions, preparing RAD libraries, data analysis, writing of the manuscript

1053 JR: sampling and processing fish, DNA extractions, whole genome assembly, data analysis, writing on  
1054 the manuscript

1055 PBM: developing grant for The Nature Conservancy, contributing samples, discussing results,  
1056 reviewing manuscript

1057 IK: developing and writing SNSF grant, facilitating permission processes, providing logistics for  
1058 fieldwork, reviewing manuscript

1059 EAS: sampling and processing fish, facilitating permission processes, providing logistics for fieldwork,  
1060 enable collaboration with Tanzanian fishermen, discussing manuscript, reviewing manuscript

1061 JBM: sampling and processing fish, facilitating permission processes, providing logistics for fieldwork,  
1062 enable collaboration with Tanzanian fishermen, discussing and reviewing manuscript

1063 BW: developing and writing SNSF grant, reviewing and discussing manuscript

1064 CD: developing SNSF grant, sampling and processing fish, facilitating logistics during fieldwork,  
1065 reviewing manuscript

1066 SM: developing SNSF grant, facilitating permission process, RAD library preparation for sequencing,  
1067 reviewing manuscript

1068 OS: developing and writing SNSF grant, identifying phenotypic sex of fish, facilitating permission  
1069 process, discussing results, reviewing and discussing manuscript

1070 CEW: developing and writing SNSF and TNC grants, sampling and processing fish, contributing  
1071 samples, whole genome assembly, data analysis, discussing results, writing manuscript, revise  
1072 manuscript

## Tables

**Table 1.** Fish collected and sequenced from Democratic Republic of Congo (DRC), Tanzania (TNZ), Zambia (ZM) and Rwanda (RW).

| <b>Number of sequenced individuals</b> |                            |                  |                 |                    |                            |
|----------------------------------------|----------------------------|------------------|-----------------|--------------------|----------------------------|
| <i>Stolothrissa tanganyicae</i>        | <i>Limnothrissa miodon</i> | Site             | Basin           | Country            | Sampling year              |
| 0                                      | 21                         | Lake Kivu        | -----           | RW                 | 2013                       |
| 7                                      | 0                          | Kilomoni         | North           | DRC                | 2016                       |
| 15                                     | 0                          | Lusenda          | North           | DRC                | 2016                       |
| 15                                     | 20                         | Kagunga          | North           | TNZ                | 2017                       |
| 61                                     | 50                         | Kigoma           | North           | TNZ                | 2015, 2016, 2017           |
| 5                                      | 2                          | Kabimba          | North           | DRC                | 2016                       |
| 25                                     | 37                         | North Mahale     | Mid             | TNZ                | 2015, 2016                 |
| 6                                      | 38                         | South Mahale     | Mid             | TNZ                | 2015, 2016                 |
| 18                                     | 12                         | Ikola            | Mid             | TNZ                | 2017                       |
| 12                                     | 61                         | Kipili           | South           | TNZ                | 2017                       |
| 0                                      | 41                         | Kasanga          | South           | TNZ                | 2017                       |
| 17                                     | 1                          | Mbete            | South           | ZM                 | 2016                       |
| 0                                      | 13                         | Crocodile Island | South           | ZM                 | 2016                       |
| <b>181 Samples</b>                     | <b>296 Samples</b>         | <b>13 Sites</b>  | <b>3 Basins</b> | <b>4 Countries</b> | <b>4 Years of Sampling</b> |

**Table 2.** Genetic diversity within (Watterson’s theta,  $\Theta_w$ , italicized along diagonal) and differentiation between (Reich-Patterson  $F_{ST}$  estimator, above diagonal) sampling sites (unshaded) and basins (shaded) for *S. tanganycae* populations included in this study. Sample sizes are indicated for each sampling location and negative  $F_{ST}$  values have been changed to 0. Bolded  $F_{ST}$  values are significantly different from 0, based on 100 bootstrapping replicates.

|                 | <i>NORTH</i>  | Kilomoni<br>n=7 | Lusenda<br>n=14 | Kagungu<br>n=12 | Kigoma<br>n=61 | Kabimba<br>n=5 | <i>MIDDLE</i> | North<br>Mahale<br>n=25 | South<br>Mahale<br>n=6 | Ikola<br>n=14 | <i>SOUTH</i> | Kipili<br>n=12 | Mbete<br>n=17 |               |               |
|-----------------|---------------|-----------------|-----------------|-----------------|----------------|----------------|---------------|-------------------------|------------------------|---------------|--------------|----------------|---------------|---------------|---------------|
| <i>NORTH</i>    | <i>0.0044</i> |                 |                 |                 |                |                | <b>0.0006</b> |                         |                        |               |              |                | <b>0.0006</b> |               |               |
| Kilomoni        |               | <i>0.0012</i>   | 0.0007          | 0.0003          | 0              | 0.0037         |               | 0.0003                  | 0                      | 0.0015        |              | 0.0018         | 0.0011        |               |               |
| Lusenda         |               |                 | <i>0.0007</i>   | <b>0.0025</b>   | 0.0015         | 0.0023         |               | 0.0015                  | 0                      | 0.0018        |              | 0.0015         | 0.0004        |               |               |
| Kagungu         |               |                 |                 | <i>0.0007</i>   | 0.0010         | <b>0.0051</b>  |               | 0.0016                  | 0                      | 0.0024        |              | 0              | 0.0020        |               |               |
| Kigoma          |               |                 |                 |                 | <i>0.0007</i>  | 0.0015         |               | 0.0006                  | 0                      | <b>0.0020</b> |              | 0.0014         | <b>0.0015</b> |               |               |
| Kabimba         |               |                 |                 |                 |                | <i>0.0008</i>  |               | 0.0018                  | 0                      | 0.0027        |              | 0.0028         | 0.0009        |               |               |
| <i>MIDDLE</i>   |               |                 |                 |                 |                |                | <i>0.0014</i> |                         |                        |               |              |                | <b>0.0012</b> |               |               |
| North<br>Mahale |               |                 |                 |                 |                |                |               | <i>0.0014</i>           | 0                      | 0.0007        |              | 0.0013         | 0.0009        |               |               |
| South<br>Mahale |               |                 |                 |                 |                |                |               |                         | <i>0.0014</i>          | 0             |              | 0              | 0             |               |               |
| Ikola           |               |                 |                 |                 |                |                |               |                         |                        | <i>0.0010</i> |              | 0.0021         | <b>0.0024</b> |               |               |
| <i>SOUTH</i>    |               |                 |                 |                 |                |                |               |                         |                        |               |              |                | <i>0.0007</i> |               |               |
| Kipili          |               |                 |                 |                 |                |                |               |                         |                        |               |              |                |               | <i>0.0011</i> | 0.00077       |
| Mbete           |               |                 |                 |                 |                |                |               |                         |                        |               |              |                |               |               | <i>0.0011</i> |

**Table 3.** Genetic diversity within (Watterson’s theta,  $\Theta_w$ , italicized along diagonal) and differentiation between (Reich-Patterson  $F_{ST}$  estimator, above diagonal) sampling sites (unshaded) and basins (shaded) for *L. miodon* populations included in this study. Sample sizes are indicated for each sampling location. Bolded  $F_{ST}$  values are significantly different from 0, based on 100 bootstrapping replicates.

|                      | Kivu<br>n=18  | <i>NORTH</i>  | Kagunga<br>n=19 | Kigoma<br>n=49 | Kabimba<br>n=2 | <i>MIDDLE</i> | North<br>Mahale<br>n=37 | South<br>Mahale<br>n=38 | Ikola<br>n=12 | <i>SOUTH</i>  | Kipili<br>n=60 | Kasanga<br>n=35 | Mbete<br>n=1  | Crocodil<br>e Island<br>n=10 |
|----------------------|---------------|---------------|-----------------|----------------|----------------|---------------|-------------------------|-------------------------|---------------|---------------|----------------|-----------------|---------------|------------------------------|
| Kivu                 | <b>0.0011</b> | <b>0.0142</b> |                 |                |                | <b>0.0145</b> |                         |                         |               | <b>0.0145</b> |                |                 |               |                              |
| <i>NORTH</i>         |               | <b>0.0053</b> |                 |                |                | <b>0.0004</b> |                         |                         |               | <b>0.0003</b> |                |                 |               |                              |
| Kagunga              |               |               | <i>0.0025</i>   | <b>0.0009</b>  | 0.0081         |               | <b>0.0009</b>           | <b>0.0012</b>           | 0.0010        |               | 0.0008         | 0.0007          | 0.0045        | 0.0007                       |
| Kigoma               |               |               |                 | <i>0.0015</i>  | 0.0066         |               | <b>0.0011</b>           | <b>0.0007</b>           | <b>0.0022</b> |               | <b>0.0007</b>  | 0.0006          | 0.0053        | <b>0.0023</b>                |
| Kabimba              |               |               |                 |                | <i>0.0011</i>  |               | 0.0058                  | 0.0072                  | <b>0.0073</b> |               | 0.0072         | 0.0070          | 0.0107        | <b>0.0121</b>                |
| <i>MIDDLE</i>        |               |               |                 |                |                | <b>0.0039</b> |                         |                         |               | <b>0.0003</b> |                |                 |               |                              |
| North<br>Mahale      |               |               |                 |                |                |               | <i>0.0007</i>           | <b>0.0012</b>           | <b>0.0029</b> |               | <b>0.0013</b>  | <b>0.0009</b>   | 0.0077        | <b>0.0026</b>                |
| South<br>Mahale      |               |               |                 |                |                |               |                         | <i>0.0004</i>           | <b>0.0016</b> |               | 0.0002         | 0.0007          | 0.0056        | <b>0.0030</b>                |
| Ikola                |               |               |                 |                |                |               |                         |                         | <i>0.0014</i> |               | <b>0.0019</b>  | 0.0010          | 0.0080        | <b>0.0048</b>                |
| <i>SOUTH</i>         |               |               |                 |                |                |               |                         |                         |               | <b>0.0055</b> |                |                 |               |                              |
| Kipili               |               |               |                 |                |                |               |                         |                         |               |               | <i>0.0032</i>  | 0.0006          | 0.0078        | <b>0.0021</b>                |
| Kasanga              |               |               |                 |                |                |               |                         |                         |               |               |                | <i>0.0019</i>   | 0.0040        | <b>0.0036</b>                |
| Mbete                |               |               |                 |                |                |               |                         |                         |               |               |                |                 | <i>0.0014</i> | 0.0092                       |
| Crocodil<br>e Island |               |               |                 |                |                |               |                         |                         |               |               |                |                 |               | <i>0.0015</i>                |



## Figures

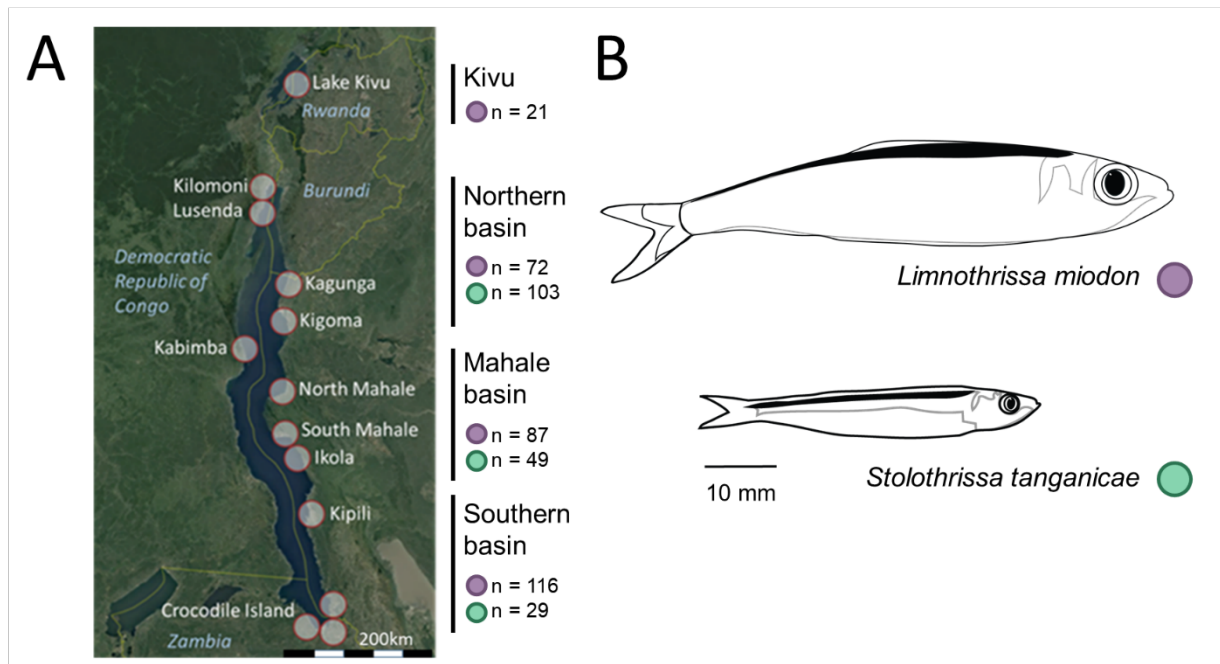

**Figure 1.** (A) Map of Lake Tanganyika, with sampling sites labeled and number of fish sequenced from the three basins within Lake Tanganyika and Lake Kivu indicated for each species. (B) Drawings of *Limnothrissa miodon* and *Stolothrissa tanganicae*, with scale indicated, show average mature sizes of the two species. Drawings courtesy of Jimena Golcher-Benavides.

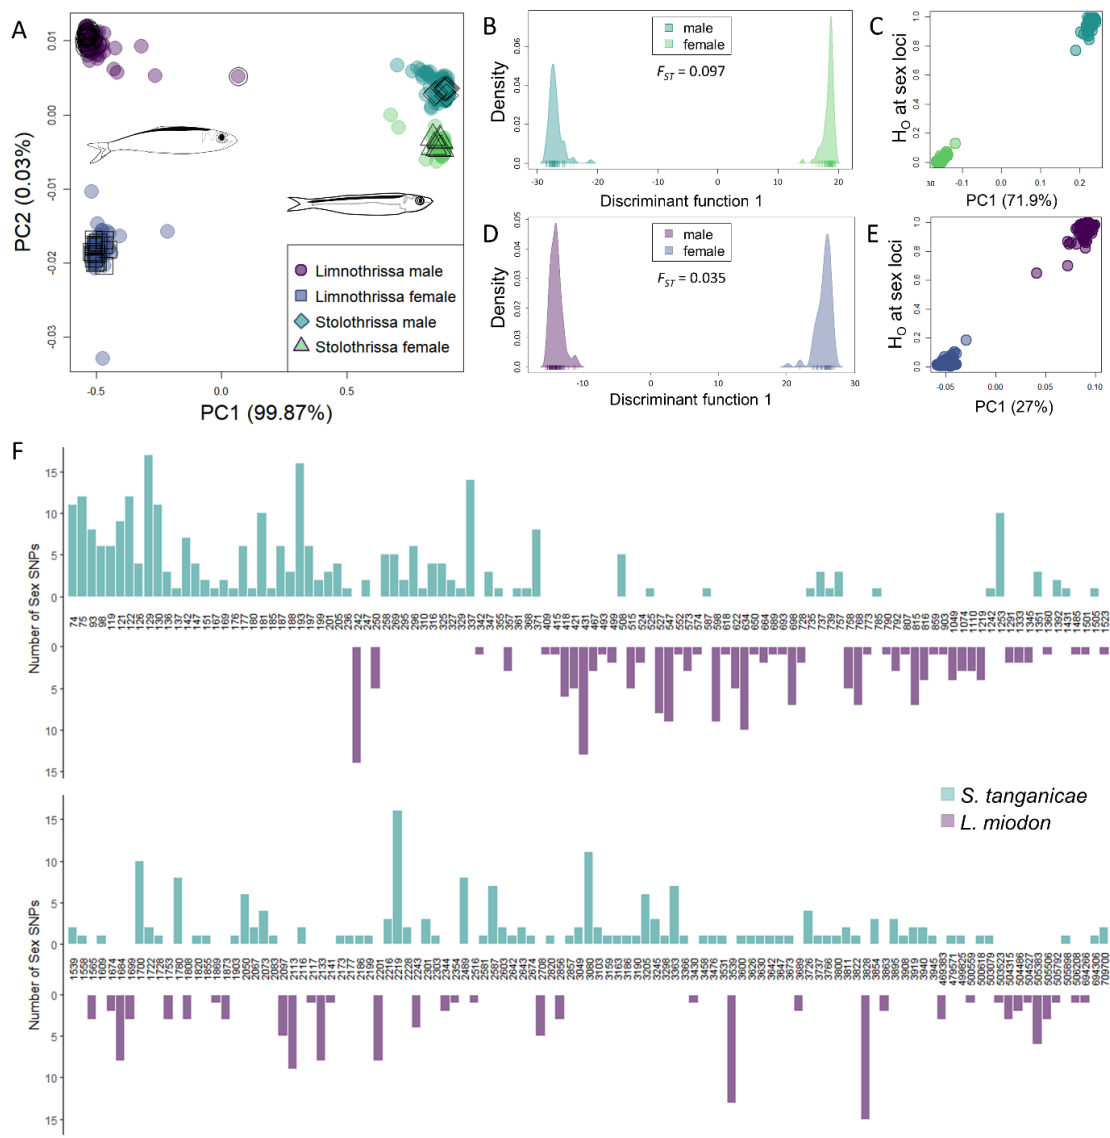

**Figure 2.** (A) Principal component analysis of all *S. tanganyicae* and *L. miodon* individuals combined, colored by species identity and sex. Empty shapes denote individuals that were dissected and for whom sex was determined phenotypically. These dissection phenotypes group into genetic clusters, and therefore were used to identify the sex of each of the genetic clusters. In the combined PCA, the first axis corresponds to species, while the second axis corresponds to sex. Discriminant analysis of principal components (DAPC) results for (B) *S. tanganyicae* and (D) *L. miodon* individually demonstrate distinct separation among males and females, with intraspecific differentiation ( $F_{ST}$ ) between the two groups indicated. DAPC on individual species was used to identify loci associated with this differentiation (see Supplementary Figure S1 and S2); observed heterozygosity ( $H_{obs}$ ) of each individual at those loci with high loadings is plotted against the first intraspecific PCA axis in (C) *S. tanganyicae* and (E) *L. miodon*, demonstrating both that sex dictates the first axis of differentiation in both species, and that males are the heterogametic sex at these loci in both species. There were 502 significant SNPs differentiating the sexes in *S. tanganyicae* and 308 significant SNPs in *L. miodon*, with no overlap between the two species. (F) Distribution of significant sex-associated SNPs in *S. tanganyicae* and *L. miodon*, with scaffolds ordered from longest to shortest (and only scaffolds with sex SNPs included). Bars indicate the number of significantly sex-associated SNPs on the given scaffold for the given species, demonstrating that no scaffolds were implicated in sex differentiation in both *S. tanganyicae* and *L. miodon*. Scaffold names are indicated across the x-axis. Note: this barplot has been wrapped onto two lines for visual ease and continues from the first line to the second.

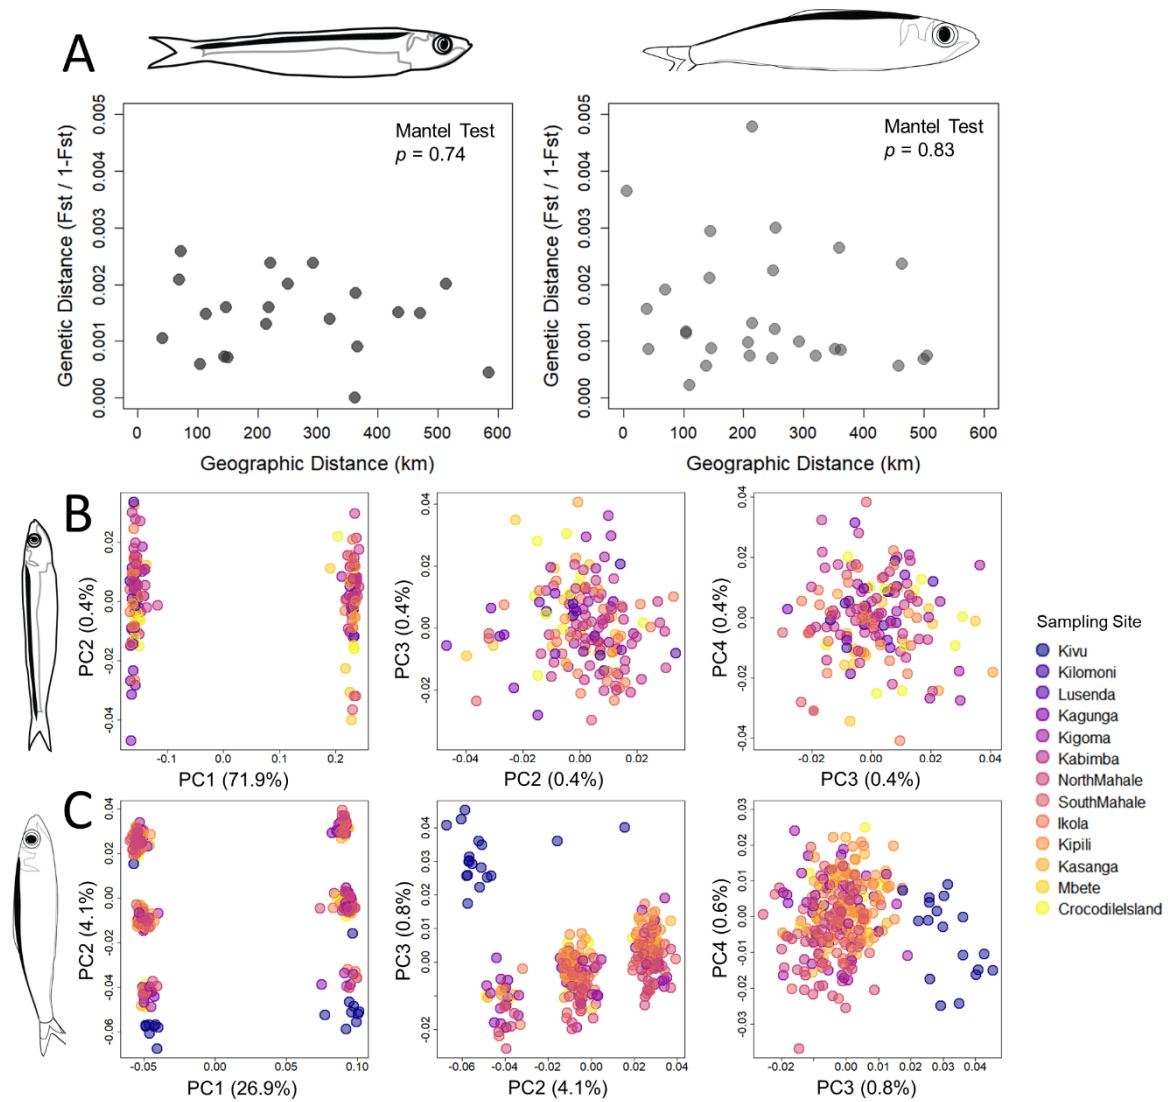

**Figure 3.** We found no evidence for strong isolation by distance or spatial genetic structure in either species. (A) shows the relationship between genetic and geographic distance for populations *S. tanganyica* (left) and *L. miodon* (right), and the results of Mantel tests between geographic distance (in km) and  $F_{ST}/(1-F_{ST})$  using the Reich-Patterson  $F_{ST}$  estimator. Neither species has evidence for isolation by distance using a Mantel test. (B) and (C) show species-specific principal components analysis of *S. tanganyica* and *L. miodon* individuals, colored by sampling sites. In both species, PC1 differentiates the sexes; in *L. miodon*, PC2 additionally separates each sex into three distinct groups, while PC3 separates individuals from Lake Kivu from those in Lake Tanganyika. Sampling sites are ordered from north (Kivu) to south (Crocodile Island).

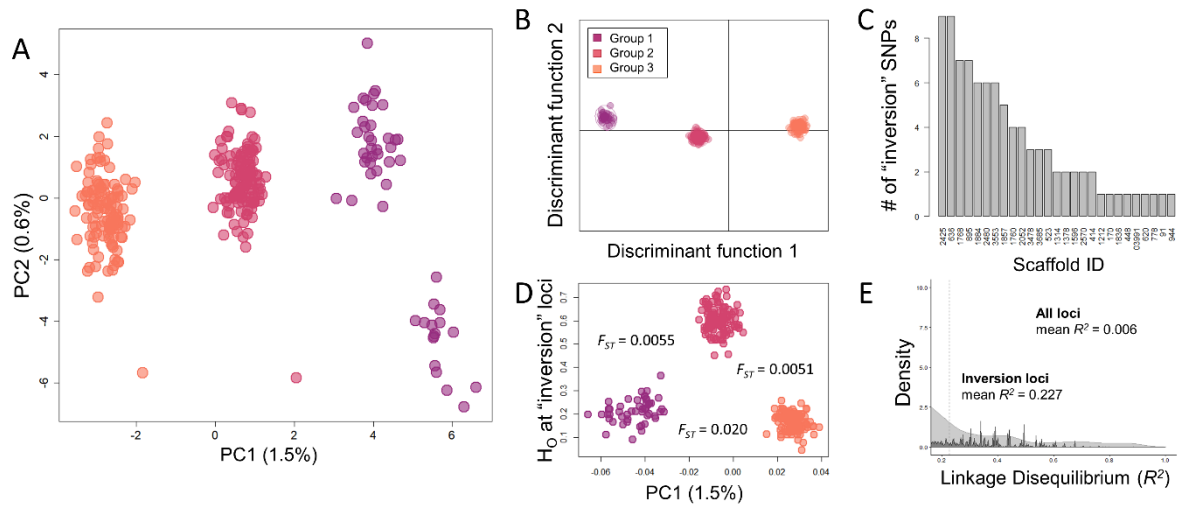

**Figure 4.** Evidence in *L. miodon* points to the existence of a segregating inversion. (A) Principal component analysis for all *L. miodon* individuals of Lake Tanganyika and Lake Kivu, following the removal of scaffolds containing sex-associated SNPs, demonstrates separation into three groups along the first axis (PC1) and separation between Lake Tanganyika and Lake Kivu individuals along PC2. (B) For discriminant analysis of principal components (DAPC), we assigned individuals according to these three groups and identified SNPs with high loadings along this axis. (C) The 91 SNPs with high loadings along this 'group' axis were found on 27 different scaffolds. (D) At these significant loci, two groups were predominantly homozygous, while the third (intermediate) group was generally heterozygous. Divergence values shown between groups were calculated using the Reich-Patterson  $F_{ST}$  estimator. Despite the fact that these SNPs were spread out across many scaffolds, the distribution of pairwise linkage disequilibrium values (E) between just the inversion loci (light) has a mean  $R^2 = 0.227$ , whereas the distribution for all loci in the data set for *L. miodon* (dark) has a mean  $R^2 = 0.006$  (both distributions truncated at  $R^2 = 0.2$  for better visibility).

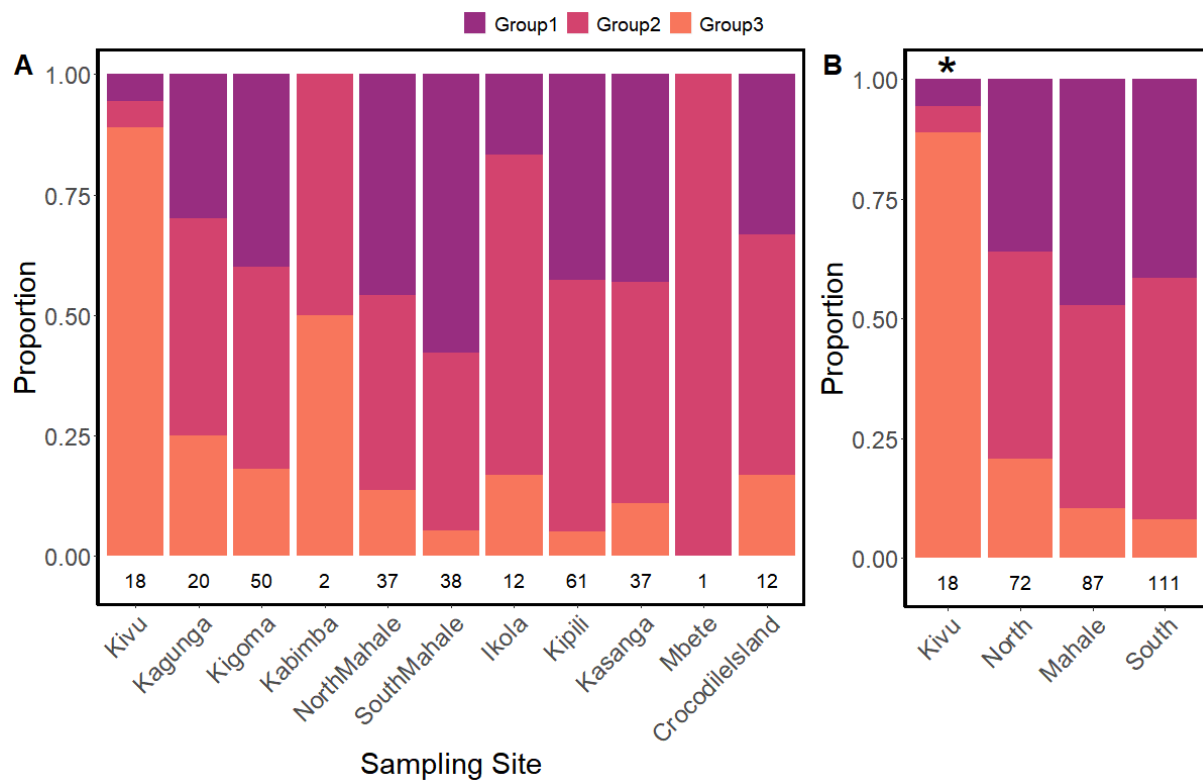

**Figure 5.** Proportion of individuals in each inversion karyotype group, by sampling site (A) and region (B). Sample sizes of individuals retained in analyses at each sampling site are indicated. In (B), the asterisk (\*) indicates rejection of HWE for the region. Sites are ordered by geographic location, from north (Kivu) to south (Crocodile Island). The relative frequency of each haplotype observed differed significantly between Lake Kivu and all three regions in Lake Tanganyika, while only the relative frequency of Group 3 (orange) differed significantly among the three regions within Lake Tanganyika.

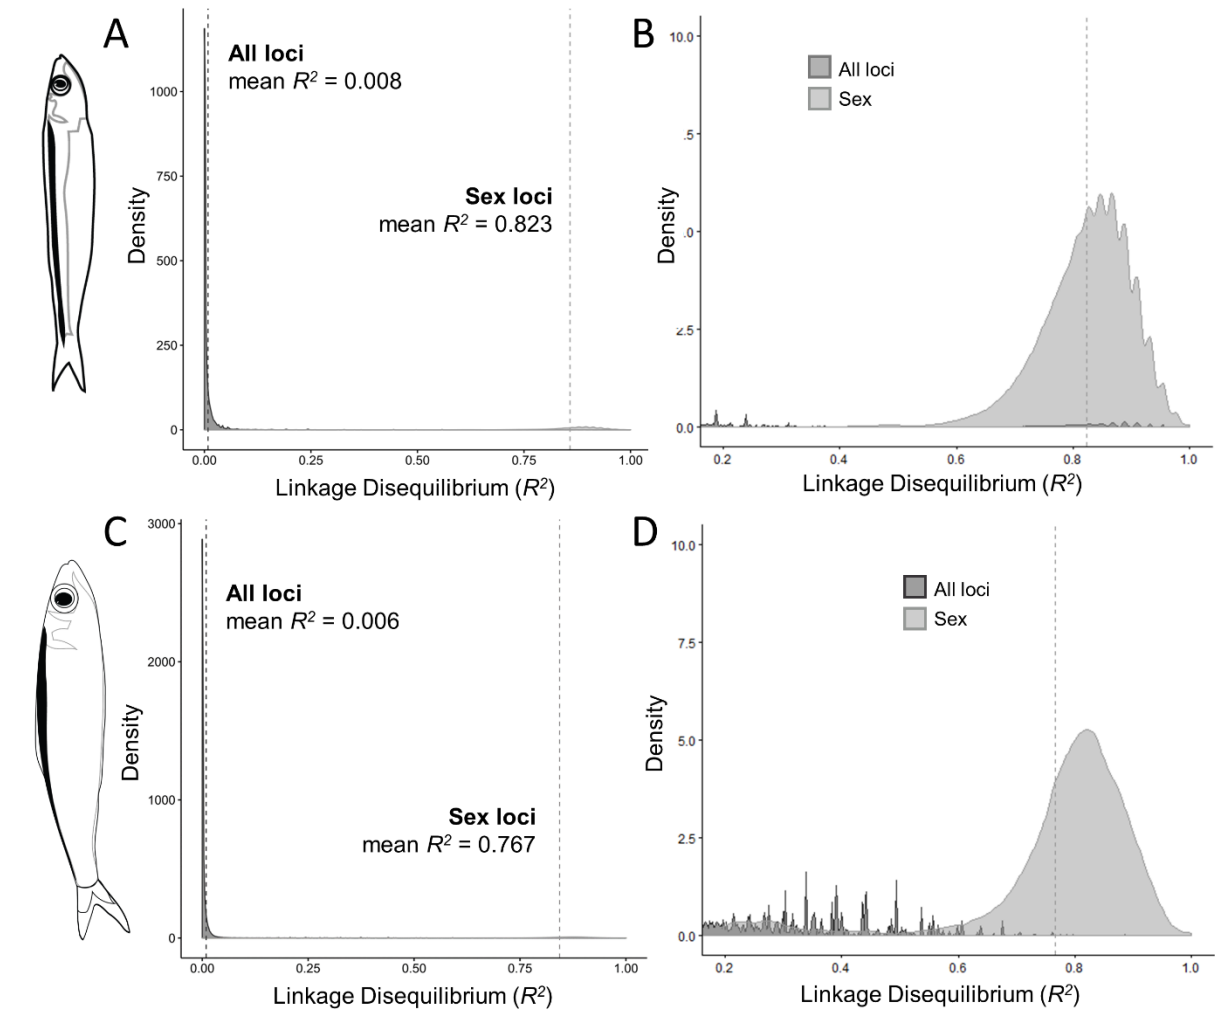

**Figure 6.** Results from an analysis of pairwise linkage disequilibrium (measured as  $R^2$ ) between SNPs in *S. tanganyicae* (A-B) and *L. miodon* (C-D), demonstrating that loci associated with sex differences (light gray distributions) are more tightly linked than expected based on linkage values for all loci in the species-specific data sets (dark gray distributions). Panels (B) and (D) have been truncated at  $R^2 = 0.2$  to better visualize the distribution of LD values for sex-associated SNPs.
