# Supplementary material for: Structural genomic variation leads to unexpected genetic differentiation in Lake Tanganyika’s sardines
Source: bioRxiv or medRxiv preprint supplement (doi:10.1101/800904), 2020-05-07
Supplement: Supplementary file [file media-1.pdf]

## Supplemental Tables and Figures

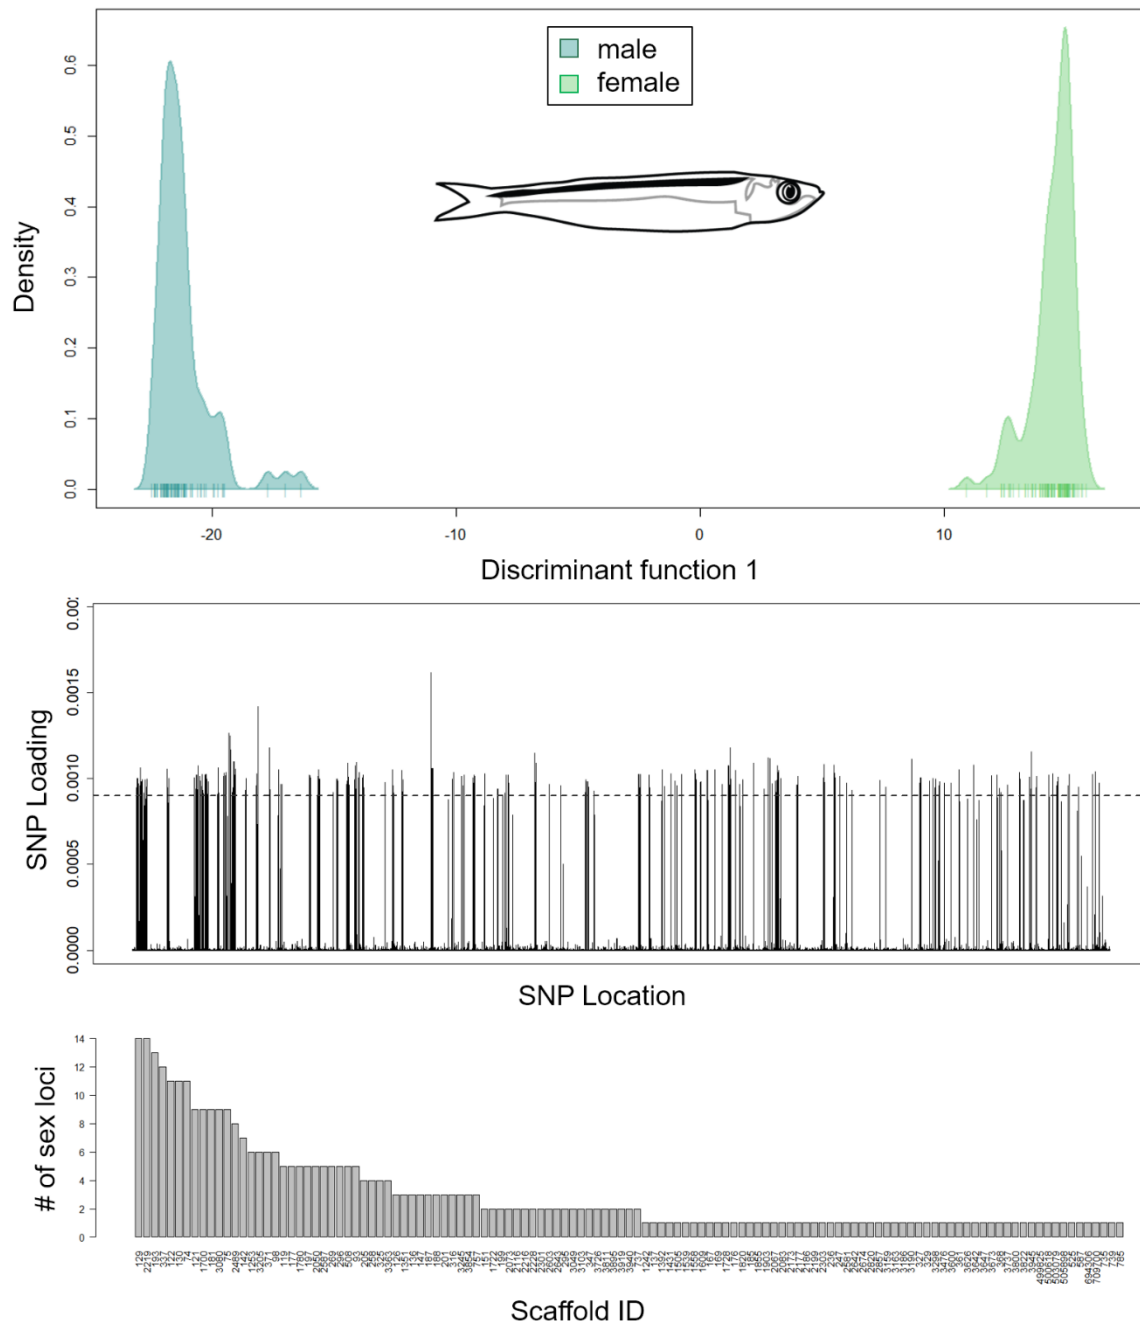

**Figure S1.** DAPC results for *Solothrissa* differentiation between sexes, showing distribution of individuals on discriminant axis 1 (top), loadings for all SNPs (middle), and distribution of the 369 significant SNPs (loading > 0.0009) across scaffolds.

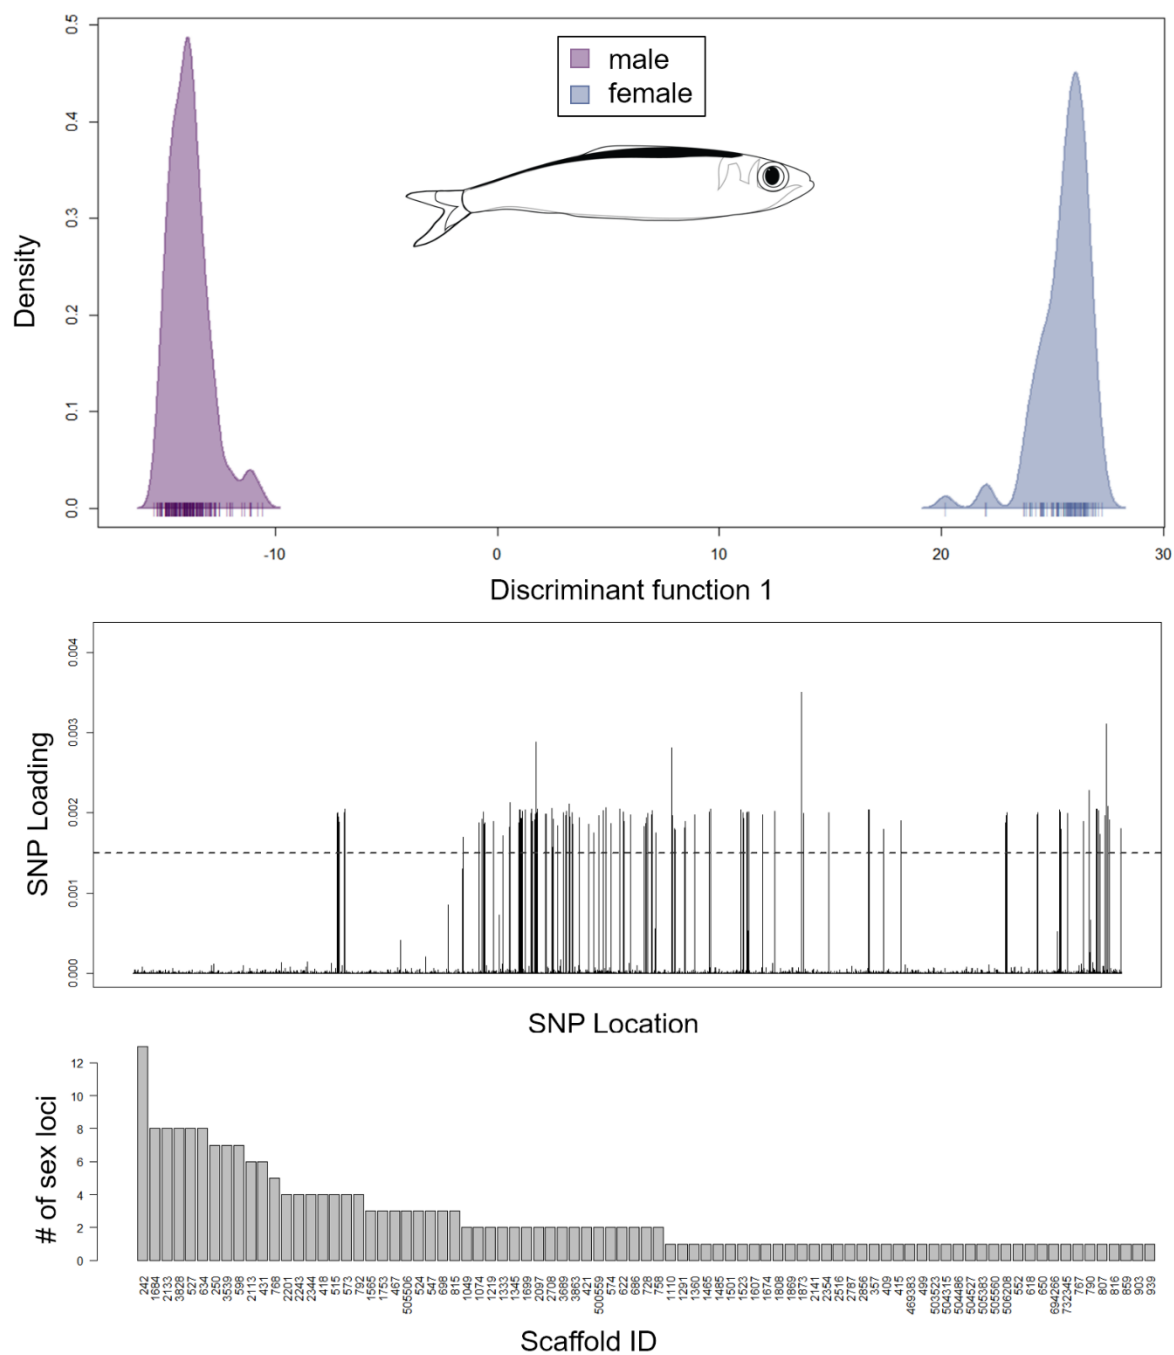

**Figure S2.** DAPC results for *Limnothrissa* differentiation between sexes, showing distribution of individuals on discriminant axis 1 (top), loadings for all SNPs (middle), and distribution of the 218 significant SNPs (loading > 0.0016) across scaffolds.

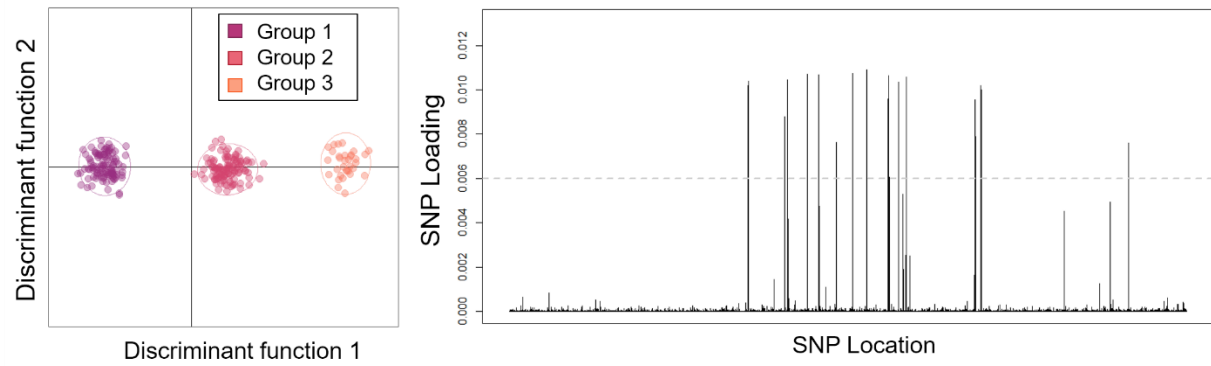

**Figure S3.** DAPC results for *Limnothrissa* differentiation between groups, showing distribution of locations on discriminant axis 1 and 2 (left), and loadings for all SNPs (right). We used a cutoff of 0.006 to identify SNPs with a significant loading on the differences between groups 1 and 3, resulting in a total of 25 significant SNPs.

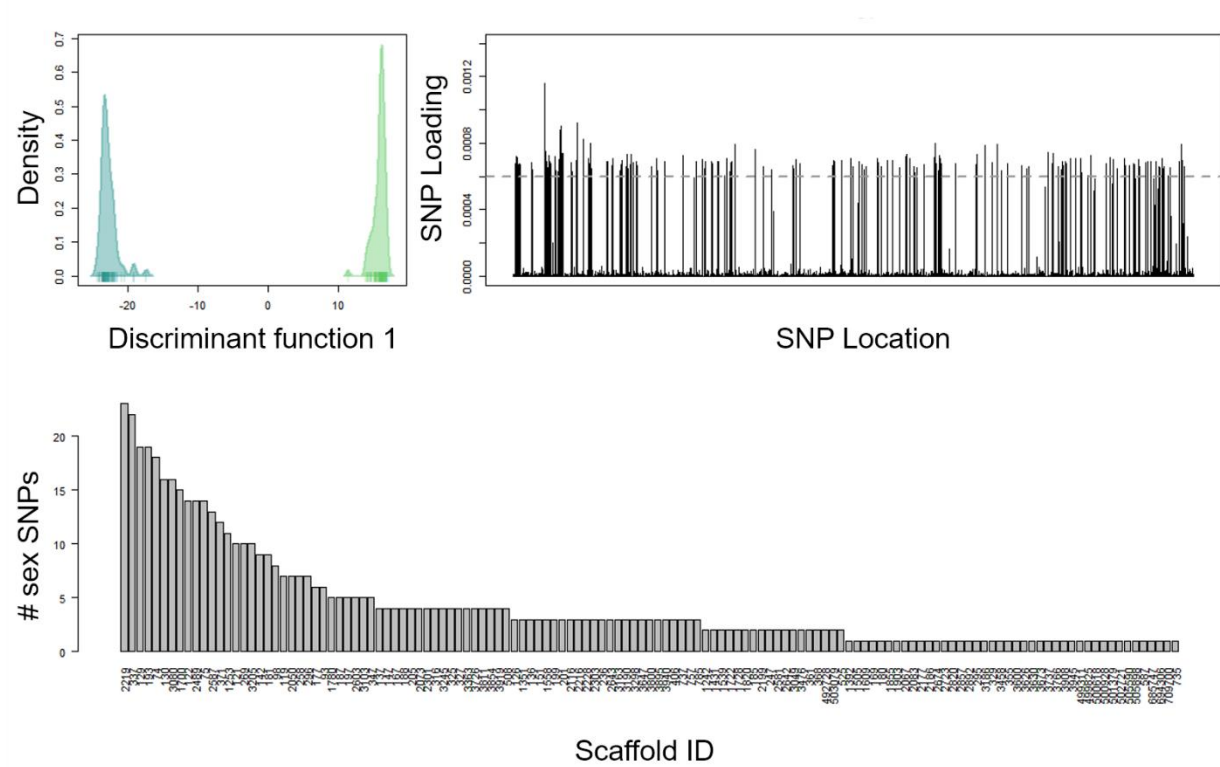

**Figure S4.** DAPC results for sex differentiation in *Stolothrissa* individuals using the combined species SNP dataset.

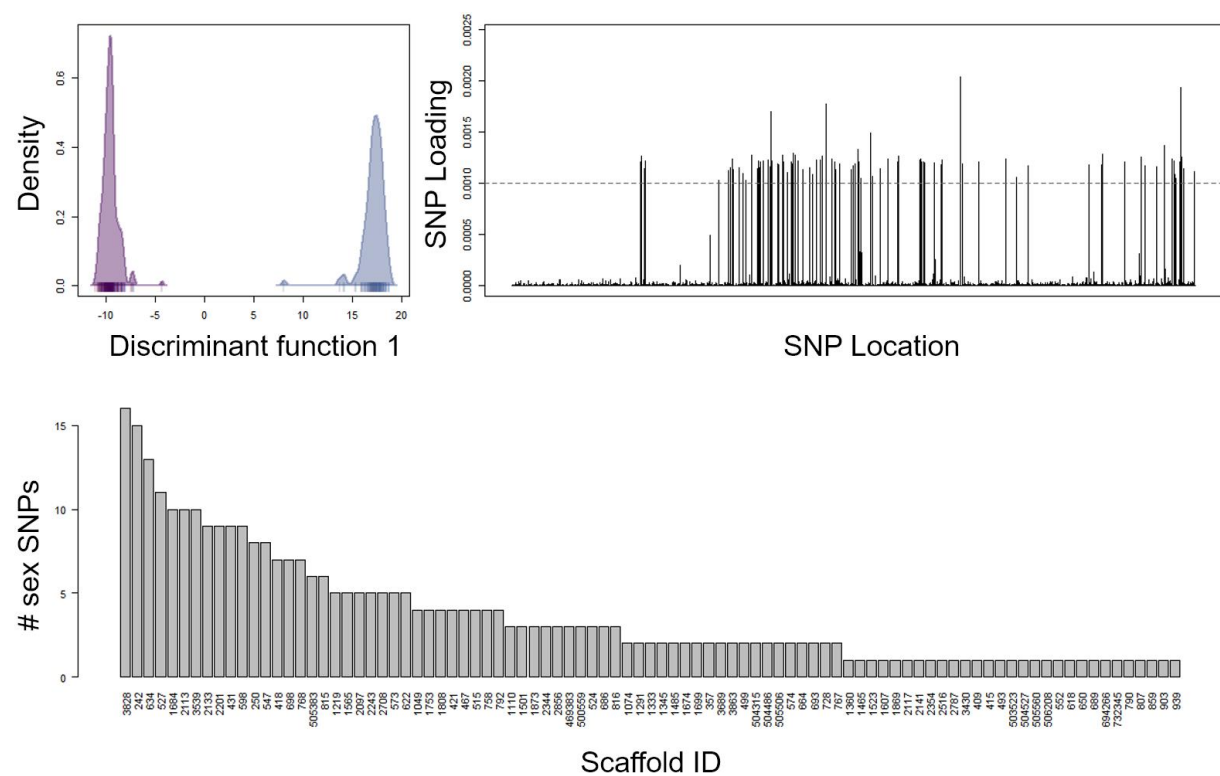

**Figure S5.** DAPC results for sex differentiation in *Limnothrissa* individuals using the combined species SNP dataset.

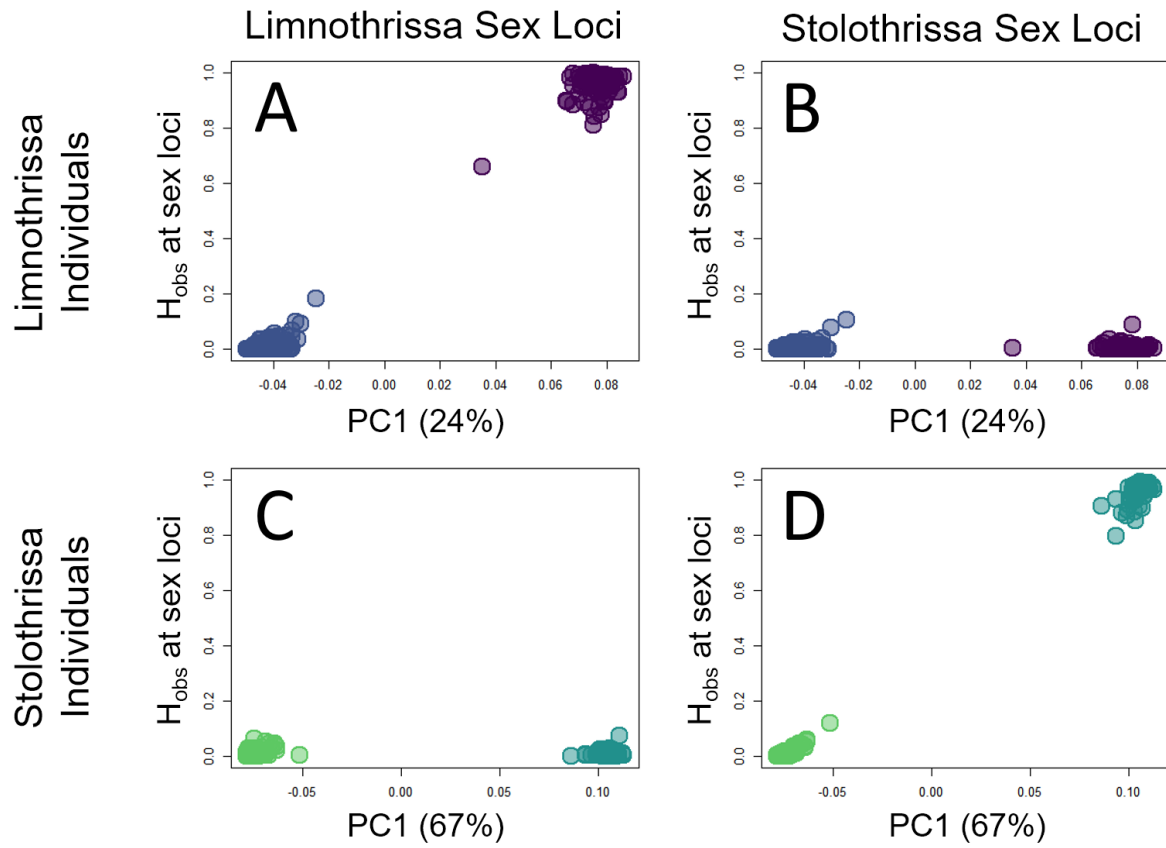

**Figure S6.** Observed heterozygosity of *Limnothrissa* individuals (A, B) and *Stolothrissa* individuals (C,D) at significant sex loci identified in *Limnothrissa* (A,C) and *Stolothrissa* (B,D), plotted against the first PC-axis for the species that the individuals belong to. Points are colored by genetically-identified sex, and PCAs were conducted on each species separately using the set of SNPs identified in the species-combined data set.

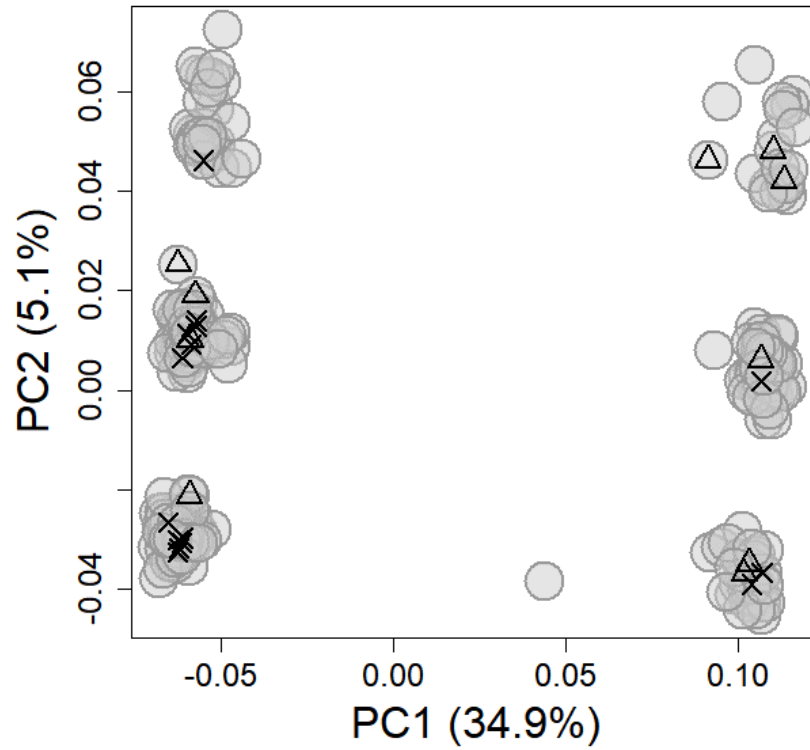

**Figure S7.** PCA of *Limnothrissa* individuals, highlighting a group of juvenile *Limnothrissa* (< 3cm) caught from the same school in Sibwesa (South Mahale) in 2015 (black X's), and nine *Limnothrissa* fry (< 2cm) caught in one scoop with a hand net in Kagunga in 2017 (black triangles). Both single-school samples included individuals from multiple different karyotypes.

**Table S1.** Sex determination in *Stolothrissa* and *Limnothrissa*

| <i>Stolothrissa</i> |             |                | <i>Limnothrissa</i> |             |                |
|---------------------|-------------|----------------|---------------------|-------------|----------------|
| Sample ID           | Genetic sex | Phenotypic sex | Sample ID           | Genetic sex | Phenotypic sex |
| 138863.IKO02        | female      | male           | 139100.KAS26        | male        | male           |
| 138864.IKO03        | male        | male           | 139122.KAS48        | female      | female         |
| 138866.IKO05        | female      | female         | 138826.KAT25        | female      | female         |
| 138867.IKO06        | female      | female         | 138827.KAT26        | female      | female         |
| 138868.IKO07        | male        | male           | 138828.KAT27        | female      | female         |
| 138869.IKO08        | male        | male           | 138831.KAT30        | female      | female         |
| 138870.IKO09        | female      | female         | 138832.KAT31        | female      | female         |
| 138872.IKO11        | male        | male           | 138836.KAT35        | female      | female         |
| 138873.IKO12        | female      | female         | 138842.KAT41        | female      | female         |
| 138874.IKO13        | female      | female         | 138919.IKO58        | male        | male           |
| 138883.IKO22        | male        | male           | 138955.IKO94        | male        | male           |
| 138889.IKO28        | male        | male           | 138982.KIP15        | female      | female         |
| 139217.KAG51        | female      | female         | 138994.KIP26        | female      | female         |
| 139219.KAG53        | female      | female         | 138998.KIP30        | female      | female         |
|                     |             |                | 139010.KIP42        | female      | female         |
|                     |             |                | 139011.KIP43        | female      | female         |
|                     |             |                | 139022.KIP54        | female      | female         |
|                     |             |                | 139098.KAS24        | male        | male           |
|                     |             |                | 139101.KAS27        | female      | female         |
|                     |             |                | 139117.KAS43        | female      | female         |
|                     |             |                | 139119.KAS45        | male        | male           |
|                     |             |                | 139137.KAS56        | male        | male           |
|                     |             |                | 139243.KAG77        | male        | male           |
|                     |             |                | 139245.KAG79        | female      | female         |
|                     |             |                | 139246.KAG80        | male        | male           |
|                     |             |                | 139252.KAG86        | male        | male           |
|                     |             |                | 64310.KIV01         | female      | female         |
|                     |             |                | 64311.KIV02         | female      | female         |
|                     |             |                | 64312.KIV03         | female      | female         |
|                     |             |                | 64445.KIV04         | male        | male           |
|                     |             |                | 64450.KIV05         | male        | male           |
|                     |             |                | 64452.KIV06         | male        | male           |
|                     |             |                | 64554.KIV07         | male        | male           |
|                     |             |                | 64555.KIV08         | male        | male           |
|                     |             |                | 64556.KIV09         | male        | male           |
|                     |             |                | 64557.KIV10         | female      | female         |
|                     |             |                | 64558.KIV11         | male        | male           |
|                     |             |                | 64559.KIV12         | male        | male           |
|                     |             |                | 64593.KIV13         | female      | female         |
|                     |             |                | 64595.KIV14         | female      | female         |
|                     |             |                | 64596.KIV15         | female      | female         |
|                     |             |                | 64597.KIV16         | female      | female         |
|                     |             |                | 64598.KIV17         | female      | female         |
|                     |             |                | 64599.KIV18         | female      | female         |
|                     |             |                | 64761.KIV19         | male        | male           |
